# Supplementary material for: Coronary arterial development is regulated by a Dll4-Jag1-EphrinB2 signaling cascade
Source: eLife. 2019 Dec 4;8:e49977. doi: 10.7554/eLife.49977 (PMC6917494; doi:10.7554/eLife.49977)
Supplement: Source data 1. [file elife-49977-data1.xlsx]

## Sheet: Figure 1_figure  suppl. 2
% Nfatc1+subepicardial coronary ECs at E12.5								% Nfatc1+ERG+ nuclei in SV at E12.5
		Right	Left	Table Analyzed	Data 1					Nfatc1
	Embryo 1	49.993	35.6685						Embryo 1	80
	Embryo 2	62.463	51.1696	Column B	Left				Embryo 2	77.4912
	Embryo 3	65.6328	43.2773	vs.	vs.
	Embryo 4	58.3333	56.25	Column A	Right
				Unpaired t test	N/A
				P value	N/A
				P value summary	N/A
				Significantly different (P < 0.05)?	N/A
				One- or two-tailed P value?	N/A
				t, df	N/A
				How big is the difference?	N/A
				Mean ± SEM of column A	59.11 ± 3.385, n=4
				Mean ± SEM of column B	46.59 ± 4.514, n=4
				Difference between means	N/A
				95% confidence interval	N/A
				R squared (eta squared)	N/A
					N/A
				F test to compare variances	N/A
				F, DFn, Dfd	N/A
				P value	N/A
				P value summary	N/A
				Significantly different (P < 0.05)?	N/A
				N/A: not applicable

## Sheet: Fig. 1
One-way Anova
Branching points J1 Dll4 Nfatc1 E12.5
	Control	Jag1Nfatc1	Dll4Nfatc1	Table Analyzed	Branching					Number of families	1
Embryo 1	85	11	201	Data sets analyzed	A : Control	B : Jag1Nfatc1	C : Dll4Nfatc1			Number of comparisons per family	3
Embryo 2	86	15	164							Alpha	0.05
Embryo 3	96	42	209	ANOVA summary
Embryo 4	123	33		F	64.85					Tukey's multiple comparisons test	Mean Diff.	95.00% CI of diff.	Significant?	Summary	Adjusted P Value
Embryo 5	83			P value	<0.0001
Embryo 6	102			P value summary	****					Control vs. Jag1Nfatc1	75.61	43.26 to 108	Yes	***	0.0002	A-B
Embryo 7	131			Significant diff. among means (P < 0.05)?	Yes					Control vs. Dll4Nfatc1	-90.48	-126.1 to -54.86	Yes	****	<0.0001	A-C
				R square	0.9218					Jag1Nfatc1 vs. Dll4Nfatc1	-166.1	-205.5 to -126.7	Yes	****	<0.0001	B-C
				Brown-Forsythe test
				F (DFn, DFd)	0.05652 (2, 11)					Test details	Mean 1	Mean 2	Mean Diff.	SE of diff.	n1	n2	q	DF
				P value	0.9453
				P value summary	ns					Control vs. Jag1Nfatc1	100.9	25.25	75.61	11.98	7	4	8.928	11
				Are SDs significantly different (P < 0.05)?	No					Control vs. Dll4Nfatc1	100.9	191.3	-90.48	13.19	7	3	9.704	11
										Jag1Nfatc1 vs. Dll4Nfatc1	25.25	191.3	-166.1	14.59	4	3	16.09	11
				Bartlett's test
				Bartlett's statistic (corrected)
				P value
				P value summary
				Are SDs significantly different (P < 0.05)?
				ANOVA table	SS	DF	MS	F (DFn, DFd)	P value
				Treatment (between columns)	47355	2	23677	F (2, 11) = 64.85	P<0.0001
				Residual (within columns)	4016	11	365.1
				Total	51371	13
				Data summary
				Number of treatments (columns)	3
				Number of values (total)	14
VM J1 Dll4 Nfatc1 E12.5
	Control	Jag1Nfatc1	Dll4Nfatc1	Table Analyzed	VM					Number of families	1
Embryo 1	0	3	2	Data sets analyzed	A : Control	B : Jag1Nfatc1	C : Dll4Nfatc1			Number of comparisons per family	3
Embryo 2	0	2	2							Alpha	0.05
Embryo 3	0	3	4	ANOVA summary
Embryo 4	0	2		F	34.79					Tukey's multiple comparisons test	Mean Diff.	95.00% CI of diff.	Significant?	Summary	Adjusted P Value
Embryo 5	0			P value	<0.0001
Embryo 6	0			P value summary	****					Control vs. Jag1Nfatc1	-2.5	-3.477 to -1.523	Yes	****	<0.0001	A-B
Embryo 7	0			Significant diff. among means (P < 0.05)?	Yes					Control vs. Dll4Nfatc1	-2.667	-3.743 to -1.591	Yes	****	<0.0001	A-C
				R square	0.8635					Jag1Nfatc1 vs. Dll4Nfatc1	-0.1667	-1.358 to 1.024	No	ns	0.9248	B-C
				Brown-Forsythe test
				F (DFn, DFd)	2.455 (2, 11)					Test details	Mean 1	Mean 2	Mean Diff.	SE of diff.	n1	n2	q	DF
				P value	0.1313
				P value summary	ns					Control vs. Jag1Nfatc1	0	2.5	-2.5	0.3619	7	4	9.77	11
				Are SDs significantly different (P < 0.05)?	No					Control vs. Dll4Nfatc1	0	2.667	-2.667	0.3984	7	3	9.466	11
										Jag1Nfatc1 vs. Dll4Nfatc1	2.5	2.667	-0.1667	0.441	4	3	0.5345	11
				Bartlett's test
				Bartlett's statistic (corrected)
				P value
				P value summary
				Are SDs significantly different (P < 0.05)?
				ANOVA table	SS	DF	MS	F (DFn, DFd)	P value
				Treatment (between columns)	23.19	2	11.6	F (2, 11) = 34.79	P<0.0001
				Residual (within columns)	3.667	11	0.3333
				Total	26.86	13
				Data summary
				Number of treatments (columns)	3
				Number of values (total)	14
EdU+ERG+ over all Dapi in Endomucin vessels
	Control	J1Nfatc1	Dll4Nfatc1
Embryo 1	0.178218	0.08	0.283105
Embryo 2	0.136	0.0526316	0.19797
Embryo 3	0.119403	0.046875	0.201681
			Table Analyzed	EdU J1Dll4Pan						Number of families	1
			Data sets analyzed	A : Control	B : J1Pan	C : Dll4Pan				Number of comparisons per family	3
										Alpha	0.05
			ANOVA summary
			F	17.85						Tukey's multiple comparisons test	Mean Diff.	95.00% CI of diff.	Significant?	Summary	Adjusted P Value
			P value	0.003
			P value summary	**						Control vs. J1Pan	0.0847	-0.00145 to 0.1709	No	ns	0.0533	A-B
			Significant diff. among means (P < 0.05)?	Yes						Control vs. Dll4Pan	-0.08304	-0.1692 to 0.00311	No	ns	0.0573	A-C
			R square	0.8561						J1Pan vs. Dll4Pan	-0.1677	-0.2539 to -0.08159	Yes	**	0.0024	B-C
			Brown-Forsythe test
			F (DFn, DFd)	0.2438 (2, 6)						Test details	Mean 1	Mean 2	Mean Diff.	SE of diff.	n1	n2	q	DF
			P value	0.7911
			P value summary	ns						Control vs. J1Pan	0.1445	0.05984	0.0847	0.02808	3	3	4.266	6
			Are SDs significantly different (P < 0.05)?	No						Control vs. Dll4Pan	0.1445	0.2276	-0.08304	0.02808	3	3	4.183	6
										J1Pan vs. Dll4Pan	0.05984	0.2276	-0.1677	0.02808	3	3	8.449	6
			Bartlett's test
			Bartlett's statistic (corrected)
			P value
			P value summary
			Are SDs significantly different (P < 0.05)?
			ANOVA table	SS	DF	MS	F (DFn, DFd)	P value
			Treatment (between columns)	0.04221	2	0.02111	F (2, 6) = 17.85	P=0.0030
			Residual (within columns)	0.007096	6	0.001183
			Total	0.04931	8
			Data summary
			Number of treatments (columns)	3
			Number of values (total)	9

## Sheet: Figure 1_figure suppl. 4
CM thickness
	Control	Jag1	Dll4	Table Analyzed						Number of families	1
	66.6501	26.6933	26.0153	Data sets analyzed	A : Control	B : Jag1	C : Dll4			Number of comparisons per family	3
	71.6113	23.1373	32.8095							Alpha	0.05
	74.6278	22.4375	37.6364	ANOVA summary
	67.5127	36.7253		F	74.65					Tukey's multiple comparisons test	Mean Diff.	95.00% CI of diff.	Significant?	Summary	Adjusted P Value
		19.4752		P value	<0.0001
				P value summary	****					Control vs. Jag1	44.41	33.81 to 55	Yes	****	<0.0001	A-B
				Significant diff. among means (P < 0.05)?	Yes					Control vs. Dll4	37.95	25.88 to 50.01	Yes	****	<0.0001	A-C
				R square	0.9431					Jag1 vs. Dll4	-6.46	-18 to 5.075	No	ns	0.3091	B-C
				Brown-Forsythe test
				F (DFn, DFd)	0.1115 (2, 9)					Test details	Mean 1	Mean 2	Mean Diff.	SE of diff.	n1	n2	q	DF
				P value	0.8957
				P value summary	ns					Control vs. Jag1	70.1	25.69	44.41	3.795	4	5	16.55	9
				Are SDs significantly different (P < 0.05)?	No					Control vs. Dll4	70.1	32.15	37.95	4.321	4	3	12.42	9
										Jag1 vs. Dll4	25.69	32.15	-6.46	4.132	5	3	2.211	9
				Bartlett's test
				Bartlett's statistic (corrected)
				P value
				P value summary
				Are SDs significantly different (P < 0.05)?
				ANOVA table	SS	DF	MS	F (DFn, DFd)	P value
				Treatment (between columns)	4779	2	2389	F (2, 9) = 74.65	P<0.0001
				Residual (within columns)	288.1	9	32.01
				Total	5067	11
				Data summary
				Number of treatments (columns)	3
				Number of values (total)	12

## Sheet: Fig. 2
	p27 in CM
		Control	Jag1Nfatc1	Dll4Nfatc1	Table Analyzed	J1PanDll4pan p27						Number of families	1
	Embryo 1	10.6807	39.0086	33.7884	Data sets analyzed	A : Control	B : Jag1Nfatc1	C : Dll4Nfatc1				Number of comparisons per family	3
	Embryo 2	13.2771	37.8311	28.4314								Alpha	0.05
	Embryo 3	11.2889	25.25	34.355	ANOVA summary
	Embryo 4	21.3194			F	13.08						Tukey's multiple comparisons test	Mean Diff.	95.00% CI of diff.	Significant?	Summary	Adjusted P Value
	Embryo 5	24.9435			P value	0.0022
	Embryo 6	13.2771			P value summary	**						Control vs. Jag1Nfatc1	-18.23	-29.84 to -6.626	Yes	**	0.0045	A-B
					Significant diff. among means (P < 0.05)?	Yes						Control vs. Dll4Nfatc1	-16.39	-28 to -4.788	Yes	**	0.0085	A-C
					R square	0.7441						Jag1Nfatc1 vs. Dll4Nfatc1	1.838	-11.56 to 15.24	No	ns	0.923	B-C
					Brown-Forsythe test
	minimum of 3 sections for each embryo				F (DFn, DFd)	0.2379 (2, 9)						Test details	Mean 1	Mean 2	Mean Diff.	SE of diff.	n1	n2	q	DF
					P value	0.7931
					P value summary	ns						Control vs. Jag1Nfatc1	15.8	34.03	-18.23	4.157	6	3	6.203	9
					Are SDs significantly different (P < 0.05)?	No						Control vs. Dll4Nfatc1	15.8	32.19	-16.39	4.157	6	3	5.577	9
												Jag1Nfatc1 vs. Dll4Nfatc1	34.03	32.19	1.838	4.8	3	3	0.5416	9
					Bartlett's test
					Bartlett's statistic (corrected)
					P value
					P value summary
					Are SDs significantly different (P < 0.05)?
					ANOVA table	SS	DF	MS	F (DFn, DFd)	P value
					Treatment (between columns)	904.3	2	452.1	F (2, 9) = 13.08	P=0.0022
					Residual (within columns)	311	9	34.56
					Total	1215	11
					Data summary
					Number of treatments (columns)	3
					Number of values (total)	12

## Sheet:  Figure 3_figure suppl. 1
% Dll4+ or Jag1+ coronary area in CM
Control	Dll4fl PDGF-Cre		Table Analyzed	Data 1		Table Analyzed	Data 2
1.173	0.018
0.882	0.335		Column B	Dll4fl PDGF-Cre		Column B	Jag1fl PDGF-Cre
			vs.	vs.		vs.	vs.
Control	Jag1fl PDGF-Cre		Column A	Control		Column A	Control
0.344	0.013
0.295	0.012		Unpaired t test			Unpaired t test
0.201	0.326		P value	0.0584		P value	0.0551
0.865	0.056		P value summary	ns		P value summary	ns
0.448	0.253		Significantly different (P < 0.05)?	No		Significantly different (P < 0.05)?	No
			One- or two-tailed P value?	Two-tailed		One- or two-tailed P value?	Two-tailed
			t, df	t=3.955 df=2		t, df	t=2.244 df=8
			How big is the difference?			How big is the difference?
			Mean ± SEM of column A	1.028 ± 0.1455, n=2		Mean ± SEM of column A	0.4306 ± 0.1157, n=5
			Mean ± SEM of column B	0.1765 ± 0.1585, n=2		Mean ± SEM of column B	0.132 ± 0.06581, n=5
			Difference between means	-0.851 ± 0.2152		Difference between means	-0.2986 ± 0.1331
			95% confidence interval	-1.777 to 0.07475		95% confidence interval	-0.6055 to 0.008291
			R squared (eta squared)	0.8866		R squared (eta squared)	0.3862
			F test to compare variances			F test to compare variances
			F, DFn, Dfd			F, DFn, Dfd	3.09, 4, 4
			P value			P value	0.3003
			P value summary			P value summary	ns
			Significantly different (P < 0.05)?			Significantly different (P < 0.05)?	No

## Sheet: Fig. 3
	WT	Jag1PdgfbCre		Table Analyzed	IsoB4 (Artery) Jag1			WT	Jag1PdgfbCre		Table Analyzed	Endomucin (Vein) Jag1			WT	Jag1PdgfbCre		Table Analyzed	N1ICD endothelium in Jag1			WT	Jag1Pdgfrb-Cre		Table Analyzed	SMA+/Notch3+ cells Jag1
Embryo 1	192257	64501		Column A	WT		Embryo 1	226149	270917		Column A	WT		Embryo 1	44.67	47.4933		Column A	WT		Embryo 1	62.6112	29.3493		Column A	WT
Embryo 2	109456	79349		vs	vs		Embryo 2	224276	214212		vs	vs		Embryo 2	39.3184	48.3742		vs	vs		Embryo 2	52.4512	29.4472		vs	vs
Embryo 3	106994	81898		Column B	Jag1PdgfbCre		Embryo 3	208237	278685		Column B	Jag1PdgfbCre		Embryo 3	42.8349	53.3186		Column B	Jagged1fl; Pdgfrb-Cre		Embryo 3	31.3006	10.9581		Column B	Jagged1fl; Pdgfrb-Cre
Embryo 4		27847					Embryo 4		231090					Embryo 4	43.9165	52.3835					Embryo 4	32.4842	18.668
				Unpaired t test							Unpaired t test							Unpaired t test							Unpaired t test
				P value	0,0465						P value	0,1848						P value	0,0062						P value	0,0442
				P value summary	*						P value summary	ns						P value summary	**						P value summary	*
				Are means signif. different? (P < 0.05)	Yes						Are means signif. different? (P < 0.05)	No						Are means signif. different? (P < 0.05)	Yes						Are means signif. different? (P < 0.05)	Yes
				One- or two-tailed P value?	Two-tailed						One- or two-tailed P value?	Two-tailed						One- or two-tailed P value?	Two-tailed						One- or two-tailed P value?	Two-tailed
				t, df	t=2.630 df=5						t, df	t=1.537 df=5						t, df	t=4.129 df=6						t, df	t=2.538 df=6
				How big is the difference?							How big is the difference?							How big is the difference?							How big is the difference?
				Mean ± SEM of column A	136200 ± 28020 N=3						Mean ± SEM of column A	219600 ± 5684 N=3						Mean ± SEM of column A	42.68 ± 1.184 N=4						Mean ± SEM of column A	44.71 ± 7.690 N=4
				Mean ± SEM of column B	63400 ± 12460 N=4						Mean ± SEM of column B	248700 ± 15520 N=4						Mean ± SEM of column B	50.39 ± 1.444 N=4						Mean ± SEM of column B	22.11 ± 4.495 N=4
				Difference between means	72840 ± 27690						Difference between means	-29170 ± 18970						Difference between means	-7.707 ± 1.867						Difference between means	22.61 ± 8.907
				95% confidence interval	1644 to 144000						95% confidence interval	-77960 to 19610						95% confidence interval	-12.28 to -3.140						95% confidence interval	0.8096 to 44.40
				R squared	0,5805						R squared	0,3210						R squared	0,7397						R squared	0,5177
				F test to compare variances							F test to compare variances							F test to compare variances							F test to compare variances
				F,DFn, Dfd	3.795, 2, 3						F,DFn, Dfd	9.946, 3, 2						F,DFn, Dfd	1.487, 3, 3						F,DFn, Dfd	2.927, 3, 3
				P value	0,3015						P value	0,1855						P value	0,7522						P value	0,4013
				P value summary	ns						P value summary	ns						P value summary	ns						P value summary	ns
				Are variances significantly different?	No						Are variances significantly different?	No						Are variances significantly different?	No						Are variances significantly different?	No
	WT	Dll4PdgfbCre		Table Analyzed	IsoB4 (Artery) Dll4			WT	Dll4PdgfbCre		Table Analyzed	Endomucin (Vein) Dll4			WT	Dll4PdgfrbCre		Table Analyzed	N1ICD endothelium in Dll4			WT	Dll4PdgfrbCre		Table Analyzed	SMA+/Notch3+ cells Dll4
Embryo 1	53178.1	26400.4		Column A	WT		Embryo 1	222600	105193		Column A	WT		Embryo 1	45.2376	37.8738		Column A	WT		Embryo 1	23.7349	8.14874		Column A	WT
Embryo 2	119697	35449.9		vs	vs		Embryo 2	182507	287587		vs	vs		Embryo 2	49.4177	39.3713		vs	vs		Embryo 2	32.1845	8.09659		vs	vs
Embryo 3	78162	20169.2		Column B	Dll4PdgfbCre		Embryo 3	191396	151848		Column B	Dll4Pdgfb		Embryo 3	61.1128	35.6512		Column B	Dll4PdgfrbCre		Embryo 3	14.6319	7.27679		Column B	Delta4fl; Pdgfrb-Cre
				Unpaired t test							Unpaired t test							Unpaired t test							Unpaired t test
				P value	0,0473						P value	0,7731						P value	0,0427						P value	0,0366
				P value summary	*						P value summary	ns						P value summary	*						P value summary	*
				Are means signif. different? (P < 0.05)	Yes						Are means signif. different? (P < 0.05)	No						Are means signif. different? (P < 0.05)	Yes						Are means signif. different? (P < 0.05)	Yes
				One- or two-tailed P value?	Two-tailed						One- or two-tailed P value?	Two-tailed						One- or two-tailed P value?	Two-tailed						One- or two-tailed P value?	Two-tailed
				t, df	t=2.831 df=4						t, df	t=0.3086 df=4						t, df	t=2.9 df=4						t, df	t=3.088 df=4
				How big is the difference?							How big is the difference?							How big is the difference?							How big is the difference?
				Mean ± SEM of column A	83680 ± 19400 N=3						Mean ± SEM of column A	198800 ± 12160 N=3						Mean ± SEM of column A	52 ± 4.8 N=3						Mean ± SEM of column A	23.52 ± 5.068 N=3
				Mean ± SEM of column B	27340 ± 4436 N=3						Mean ± SEM of column B	181500 ± 54710 N=3						Mean ± SEM of column B	38 ± 1.1 N=3						Mean ± SEM of column B	7.841 ± 0.2824 N=3
				Difference between means	56340 ± 19900						Difference between means	17290 ± 56040						Difference between means	14 ± 4.9						Difference between means	15.68 ± 5.076
				95% confidence interval	1096 to 111600						95% confidence interval	-138300 to 172900						95% confidence interval	0.77 to 28						95% confidence interval	1.585 to 29.77
				R squared	0,6671						R squared	0,02325						R squared	0,68						R squared	0,7045
				F test to compare variances							F test to compare variances							F test to compare variances							F test to compare variances
				F,DFn, Dfd	19.12, 2, 2						F,DFn, Dfd	20.25, 2, 2						F,DFn, Dfd	19, 2, 2						F,DFn, Dfd	322.2, 2, 2
				P value	0,0994						P value	0,0941						P value	0,0984						P value	0,0062
				P value summary	ns						P value summary	ns						P value summary	ns						P value summary	**
				Are variances significantly different?	No						Are variances significantly different?	No						Are variances significantly different?	No						Are variances significantly different?	Yes

## Sheet: Figure 3_figure suppl. 2
SM22+Notch3+/Notch3+
Control	Dll4fl; Pdgfrb-Cre			Table Analyzed	Data 1			Table Analyzed	Data 2
6.13	0.25
6.22	0.39			Column B	Dll4fl; Pdgfrb-Cre			Column B	Jag1fl; Pdgfrb-Cre
6.8	0.06			vs.	vs.			vs.	vs.
				Column A	Control			Column A	Control
Control	Jag1fl; Pdgfrb-Cre
5.41	1.85			Unpaired t test				Unpaired t test
5.71	0.46			P value	<0.0001			P value	0.0016
6.88	1.58			P value summary	****			P value summary	**
				Significantly different (P < 0.05)?	Yes			Significantly different (P < 0.05)?	Yes
				One- or two-tailed P value?	Two-tailed			One- or two-tailed P value?	Two-tailed
				t, df	t=26.66 df=4			t, df	t=7.608 df=4
				How big is the difference?				How big is the difference?
				Mean ± SEM of column A	6.383 ± 0.2099, n=3			Mean ± SEM of column A	6 ± 0.4484, n=3
				Mean ± SEM of column B	0.2333 ± 0.09563, n=3			Mean ± SEM of column B	1.297 ± 0.4255, n=3
				Difference between means	-6.15 ± 0.2307			Difference between means	-4.703 ± 0.6182
				95% confidence interval	-6.791 to -5.509			95% confidence interval	-6.42 to -2.987
				R squared (eta squared)	0.9944			R squared (eta squared)	0.9354
				F test to compare variances				F test to compare variances
				F, DFn, Dfd	4.82, 2, 2			F, DFn, Dfd	1.111, 2, 2
				P value	0.3436			P value	0.9476
				P value summary	ns			P value summary	ns
				Significantly different (P < 0.05)?	No			Significantly different (P < 0.05)?	No

## Sheet: Figure 3_figure suppl. 3
Jagged1VeCadERT
IsoB4 Area							Emcn Area														number of SMA+, Notch3+ double positive cells per number of intramyocardial vessels							number of SMA+, Notch3+ double positive cells per number of subepicardial vessels
	Control	Jag1VeCad		Table Analyzed	Artery area			Control	Jag1VeCad		Table Analyzed	Vein area		% N1ICD/Dapi								Control	Jag1VeCad		Table Analyzed	SMA+, Notch3+ cells in intramyocardial vessels			Control	Jag1VeCad		Table Analyzed	SMA+, Notch3+ cells in subepicardial vessels
Embryo 1	70663.1	49090					Embryo 1	266027	350253						Control	Jag1VeCad		Table Analyzed	Data 1		Embryo 1	0.137525	0.0177534					Embryo 1	0.0769048	0.026048
Embryo 2	110694	19319.8		Column B	Jag1VeCad		Embryo 2	298444	312233		Column B	Jag1VeCad		Embryo 1	26.9439	41.2346					Embryo 2	0.170279	0.053211		Column B	Control		Embryo 2	0.025	0.194779		Column B	Control
Embryo 3	83138.7	54500.2		vs.	vs.		Embryo 3	264462	322010		vs.	vs.		Embryo 2	28.4989	40.2475		Column B	Jag1		Embryo 3	0.10284	0.0239839		vs.	vs,		Embryo 3	0.0292787	0.0143638		vs.	vs,
				Column A	Control						Column A	Control		Embryo 3	38.9791	61.2337		vs.	vs.						Column A	Jag1VeCad						Column A	Jag1VeCad
														Embryo 4		52.9886		Column A	wt
				Unpaired t test							Unpaired t test														Unpaired t test							Unpaired t test
				P value	0.0428						P value	0.031						Unpaired t test							P value	0.0092						P value	0.598
				P value summary	*						P value summary	*						P value	0.0486						P value summary	**						P value summary	ns
				Significantly different? (P < 0.05)	Yes						Significantly different? (P < 0.05)	Yes						P value summary	*						Significantly different (P < 0.05)?	Yes						Significantly different (P < 0.05)?	No
				One- or two-tailed P value?	Two-tailed						One- or two-tailed P value?	Two-tailed						Significantly different (P < 0.05)?	Yes						One- or two-tailed P value?	Two-tailed						One- or two-tailed P value?	Two-tailed
				t, df	t=2.930 df=4						t, df	t=3.263 df=4						One- or two-tailed P value?	Two-tailed						t, df	t=4,713 df=4						t, df	t=0,5719 df=4
																		t, df	t=2.593 df=5
				How big is the difference?							How big is the difference?														How big is the difference?							How big is the difference?
				Mean ± SEM of column A	88165 ± 11826, n=3						Mean ± SEM of column A	276311 ± 11076, n=3						How big is the difference?							Mean ± SEM of column A	0,1369 ± 0,01947, n=3						Mean ± SEM of column A	0,04373 ± 0,01663, n=3
				Mean ± SEM of column B	40970 ± 10937, n=3						Mean ± SEM of column B	328165 ± 11399, n=3						Mean ± SEM of column A	31.47 ± 3.779, n=3						Mean ± SEM of column B	0,03165 ± 0,01093, n=3						Mean ± SEM of column B	0,0784 ± 0,05829, n=3
				Difference between means	-47195 ± 16108						Difference between means	51854 ± 15893						Mean ± SEM of column B	48.93 ± 5.02, n=4						Difference between means	-0,1052 ± 0,02233						Difference between means	0,03467 ± 0,06062
				95% confidence interval	-91920 to -2471						95% confidence interval	7727 to 95982						Difference between means	17.45 ± 6.729						95% confidence interval	-0,1672 to -0,04324						95% confidence interval	-0,1336 to 0,203
				R squared	0.6821						R squared	0.7269						95% confidence interval	0.1536 to 34.75						R squared (eta squared)	0.8474						R squared (eta squared)	0.0756
																		R squared (eta squared)	0.5736
				F test to compare variances							F test to compare variances														F test to compare variances							F test to compare variances
				F,DFn, Dfd	1.169, 2, 2						F,DFn, Dfd	1.059, 2, 2						F test to compare variances							F, DFn, Dfd	3,173, 2, 2						F, DFn, Dfd	12,28, 2, 2
				P value	0.922						P value	0.9712						F, DFn, Dfd	2.353, 3, 2						P value	0.4792						P value	0.1506
				P value summary	ns						P value summary	ns						P value	0.6243						P value summary	ns						P value summary	ns
				Significantly different? (P < 0.05)	No						Significantly different? (P < 0.05)	No						P value summary	ns						Significantly different (P < 0.05)?	No						Significantly different (P < 0.05)?	No
																		Significantly different (P < 0.05)?	No
Dll4VeCadERT
IsoB4 Area							Emcn Area														Caliber							number of SMA+, Notch3+ double positive cells per number of intramyocardial vessels
	Control	Dll4Vecad		Table Analyzed	Dll4 Artery micron			Control	Dll4Vecad		Table Analyzed	Dll4 Vein Micron		% N1ICD/Dapi				Table Analyzed	Data 1			Control	Dll4Vecad		Table Analyzed	Micron			Control	Dll4Vecad
Embryo 1	64644.8	12642.8					Embryo 1	338499	289487						Control	Dll4Vecad					Embryo 1	41.6491	60.4913					Embryo 1	0.108666	0.0371604		Table Analyzed	Data 1
Embryo 2	100264	6507		Column B	ko		Embryo 2	368982	333835		Column B	ko		Embryo 1	50.5192	16.8305		Column B	Dll4Vecad		Embryo 2	45.9025	61.9837		Column B	Dll4Vecad		Embryo 2	0.0860578	0.0408106
Embryo 3	118861	4387.5		vs.	vs.		Embryo 3	333868	211018		vs.	vs.		Embryo 2	33.8785	17.8213		vs.	vs.		Embryo 3	54.1933	59.6119		vs.	vs.		Embryo 3	0.0462022	0.0292039		Column B	Dl4fl,VecadCre
				Column A	wt						Column A	wt		Embryo 3	25.5898	6.64641		Column A	Control						Column A	wt						vs.	vs,
																																Column A	WT
				Unpaired t test							Unpaired t test							Unpaired t test							Unpaired t test
				P value	0.0057						P value	0.1401						P value	0.0484						P value	0.023						Unpaired t test
				P value summary	**						P value summary	ns						P value summary	*						P value summary	*						P value	0.0744
				Significantly different? (P < 0.05)	Yes						Significantly different? (P < 0.05)	No						Significantly different (P < 0.05)?	Yes						Significantly different? (P < 0.05)	Yes						P value summary	ns
				One- or two-tailed P value?	Two-tailed						One- or two-tailed P value?	Two-tailed						One- or two-tailed P value?	Two-tailed						One- or two-tailed P value?	Two-tailed						Significantly different (P < 0.05)?	No
				t, df	t=5.389 df=4						t, df	t=1.837 df=4						t, df	t=2.808 df=4						t, df	t=3.588 df=4						One- or two-tailed P value?	Two-tailed
																																t, df	t=2,4 df=4
				How big is the difference?							How big is the difference?							How big is the difference?							How big is the difference?
				Mean ± SEM of column A	94590 ± 15906, n=3						Mean ± SEM of column A	347117 ± 11014, n=3						Mean ± SEM of column A	36.66 ± 7.33, n=3						Mean ± SEM of column A	47.25 ± 3.683, n=3						How big is the difference?
				Mean ± SEM of column B	7846 ± 2475, n=3						Mean ± SEM of column B	278114 ± 35907, n=3						Mean ± SEM of column B	13.77 ± 3.571, n=3						Mean ± SEM of column B	60.70 ± 0.6923, n=3						Mean ± SEM of column A	0,08031 ± 0,01826, n=3
				Difference between means	-86744 ± 16097						Difference between means	-69003 ± 37558						Difference between means	-22.9 ± 8.154						Difference between means	13.45 ± 3.748						Mean ± SEM of column B	0,03572 ± 0,003427, n=3
				95% confidence interval	-131438 to -42051						95% confidence interval	-173282 to 35276						95% confidence interval	-45.53 to -0.2584						95% confidence interval	3.042 to 23.85						Difference between means	-0,04458 ± 0,01858
				R squared	0.8789						R squared	0.4577						R squared (eta squared)	0.6635						R squared	0.763						95% confidence interval	-0,09617 to 0,006998
																																R squared (eta squared)	0.5901
				F test to compare variances							F test to compare variances							F test to compare variances							F test to compare variances
				F,DFn, Dfd	41.29, 2, 2						F,DFn, Dfd	10.63, 2, 2						F, DFn, Dfd	4.213, 2, 2						F,DFn, Dfd	28.31, 2, 2						F test to compare variances
				P value	0.0473						P value	0.172						P value	0.3837						P value	0.0682						F, DFn, Dfd	28,4, 2, 2
				P value summary	*						P value summary	ns						P value summary	ns						P value summary	ns						P value	0.068
				Significantly different? (P < 0.05)	Yes						Significantly different? (P < 0.05)	No						Significantly different (P < 0.05)?	No						Significantly different? (P < 0.05)	No						P value summary	ns
																																Significantly different (P < 0.05)?	No

## Sheet: Figure 3_figure suppl. 4 
One-way Anova
Jag1-Dll4VeCadERT LV thickness (mm) E15.5
	Controll	Jag1	Dll4Vecad		Number of families	1
Embryo 1	199.526	143.022			Number of comparisons per family	2
Embryo 2	144.667	126.776			Alpha	0.05
Embryo 3	140.663	177.552
Embryo 4	168.374		107.336		Dunnett's multiple comparisons test	Mean Diff.	95.00% CI of diff.	Significant?	Summary	Adjusted P Value	A-?
Embryo 5	177.919		73.7608
Embryo 6	180.158		127.527		Controll vs. Jag1	19.43	-25.63 to 64.5	No	ns	0.4535	B	Jag1
					Controll vs. Dll4Vecad	65.68	20.61 to 110.7	Yes	**	0.0076	C	Dll4Vecad
					Test details	Mean 1	Mean 2	Mean Diff.	SE of diff.	n1	n2	q	DF
					Controll vs. Jag1	168.6	149.1	19.43	17.24	6	3	1.127	9
					Controll vs. Dll4Vecad	168.6	102.9	65.68	17.24	6	3	3.809	9
Jag1-Dll4VeCadERT RV thickness (mm) E15.5
	Controll	Jag1	Dll4Vecad		Number of families	1
Embryo 1	102.918	75.0603	95.9535		Number of comparisons per family	2
Embryo 2	165.106	77.4676	96.4775		Alpha	0.05
Embryo 3	155.322	97.0713	40.6379
Embryo 4	119.154				Dunnett's multiple comparisons test	Mean Diff.	95.00% CI of diff.	Significant?	Summary	Adjusted P Value	A-?
Embryo 5	104.732
Embryo 6	144.666				Controll vs. Jag1	48.78	1.433 to 96.13	Yes	*	0.044	B	Jag1
					Controll vs. Dll4Vecad	54.29	6.943 to 101.6	Yes	*	0.0271	C	Dll4Vecad
					Test details	Mean 1	Mean 2	Mean Diff.	SE of diff.	n1	n2	q	DF
					Controll vs. Jag1	132	83.2	48.78	18.11	6	3	2.693	9
					Controll vs. Dll4Vecad	132	77.69	54.29	18.11	6	3	2.997	9

## Sheet: Fig. 4
Dll4GofTie2Cre							Dll4GofTie2Cre E16.5															Dll4GofTie2Cre
E14.5							IsoB4 Area							Emcn Area								% N1ICD/Dapi
Emcn				Table Analyzed	Data 1			Control	Dll4Gof		Table Analyzed	Artery			Control	Dll4Gof		Table Analyzed	Vein				Control	Dll4Gof		Table Analyzed	Data 1
							Embryo 1	236515	49762.3					Embryo 1	295141	546380						Embryo 1	27.9886	51.6399
	Control	Dll4gof		Column B	D4gof		Embryo 2	207270	64008.1		Column B	Dll4GOFT2		Embryo 2	243905	458243		Column B	Dll4GOFT2			Embryo 2	18.4147	47.0738		Column B	Dll4Gof
Embryo 1	229430	301869		vs.	vs.		Embryo 3	245695			vs.	vs.		Embryo 3	266993			vs.	vs.			Embryo 3	36.6622	50.1895		vs.	vs.
Embryo 2	225110	250279		Column A	WT						Column A	Control						Column A	Control			Embryo 4		69.4874		Column A	Control
Embryo 3		273057
				Unpaired t test																						Unpaired t test
				P value	0.0899						Unpaired t test							Unpaired t test								P value	0.0152
				P value summary	ns						P value	0.0017						P value	0.0087							P value summary	*
				Significantly different (P < 0.05)?	No						P value summary	**						P value summary	**							Significantly different (P < 0.05)?	Yes
				One- or two-tailed P value?	Two-tailed						Significantly different (P < 0.05)?	Yes						Significantly different (P < 0.05)?	Yes							One- or two-tailed P value?	Two-tailed
				t, df	t=2.472 df=3						One- or two-tailed P value?	Two-tailed						One- or two-tailed P value?	Two-tailed							t, df	t=3.622 df=5
											t, df	t=10.9 df=3						t, df	t=6.147 df=3
				How big is the difference?																						How big is the difference?
				Mean ± SEM of column A	227270 ± 2160, n=2						How big is the difference?							How big is the difference?								Mean ± SEM of column A	27.69 ± 5.27, n=3
				Mean ± SEM of column B	275068 ± 14927, n=3						Mean ± SEM of column A	229827 ± 11585, n=3						Mean ± SEM of column A	268680 ± 14815, n=3							Mean ± SEM of column B	54.6 ± 5.054, n=4
				Difference between means	47798 ± 19337						Mean ± SEM of column B	56885 ± 7123, n=2						Mean ± SEM of column B	502312 ± 44068, n=2							Difference between means	26.91 ± 7.429
				95% confidence interval	-13742 to 109338						Difference between means	-172941 ± 15871						Difference between means	233632 ± 38009							95% confidence interval	7.811 to 46.01
				R squared (eta squared)	0.6707						95% confidence interval	-223450 to -122432						95% confidence interval	112670 to 354594							R squared (eta squared)	0.724
											R squared (eta squared)	0.9754						R squared (eta squared)	0.9264
				F test to compare variances																						F test to compare variances
				F, DFn, Dfd							F test to compare variances							F test to compare variances								F, DFn, Dfd	1.226, 3, 2
				P value							F, DFn, Dfd							F, DFn, Dfd								P value	0.9572
				P value summary							P value							P value								P value summary	ns
				Significantly different (P < 0.05)?							P value summary							P value summary								Significantly different (P < 0.05)?	No
							number of SMA+, Notch3+ double positive cells per number of intramyocardial vessels
								Control	Dll4Gof		Table Analyzed	SMA+, Notch3+ cells in intramyocardial vessels
							Embryo 1	0.187798	0.0187365
							Embryo 2	0.1012	0.0136014		Column B	Dl4GOF
							Embryo 3	0.142259	0.0266387		vs.	vs,
											Column A	WT
											Unpaired t test
											P value	0.008
											P value summary	**
											Significantly different (P < 0.05)?	Yes
											One- or two-tailed P value?	Two-tailed
											t, df	t=4,906 df=4
											How big is the difference?
											Mean ± SEM of column A	0,1438 ± 0,02501, n=3
											Mean ± SEM of column B	0,01966 ± 0,003792, n=3
											Difference between means	-0,1241 ± 0,0253
											95% confidence interval	-0,1943 to -0,05386
											R squared (eta squared)	0.8575
											F test to compare variances
											F, DFn, Dfd	43,51, 2, 2
											P value	0.0449
											P value summary	*
											Significantly different (P < 0.05)?	Yes

[truncated: 6 more sheets: Figure 4_figure suppl. 1, Fig. 5, Figure 5_figure suppl. 1, Fig. 6, Fig. 7, Figure 7_figure  suppl. 1]
