# Supplementary material for: Coronary arterial development is regulated by a Dll4-Jag1-EphrinB2 signaling cascade
Source: eLife. 2019 Dec 4;8:e49977. doi: 10.7554/eLife.49977 (PMC6917494; doi:10.7554/eLife.49977)
Supplement: Supplementary file 1. [file elife-49977-supp1.xlsx]

## Sheet: Jag1Nfatc1
Lethality phase of Jagged1;Nfatc1-Cre embryos. Genotypes obtained after breeding males Jag1flox/+;Nfatc1Cre/+ with females Jag1 flox/ flox.
				#total
					Jag1flox/flox;Nfatc1Cre	Jag1flox/flox;Nfatc1+/+	Jag1flox/+; Nfatc1Cre	Jag1flox/+;Nfatc1+/+
			E9.5	59(10)	14 (23.73%)	11 (18.64%)	10 (16.95%)	24 (40.68%)
			E10.5	28(3)	4 (14.29%)	5 (17.86%)	10 (35.71%)	9 (32.14%)
			E11.5	77(21)	13 (16.88%)	22 (28.57%)	17 (22.08%)	25 (32.471%)
			E12.5	134(36)	21 (15.67%)	40 (29.85%)	41 (30.60%)	52 (38.81%)
			E13.5	258(65)	12 (4.65%)	86 (33.33%)	79 (30.62%)	81 (31.40%)
			E14.5	90(25)	0 (0%)	28 (31.11%)	25 (27.77%)	37 (41.11%)
			E15.5	22(9)	0 (0%)	8 (36.36%)	6 (27.27%)	8 (36.36%)

## Sheet: Dll4Nfatc1
		Lethality phase of Dll4;Nfatc1-Cre embryos. Genotypes obtained after breeding males Dll4flox/+;Nfatc1-Cre/+ with females Dll4 flox/ flox.
					#total		Dll4flox/flox;Nfatc+/+		Dll4flox/+;Nfatc+/+
						Dll4flox/flox; Nfatc1CRE/+		Dll4flox/+;Nfatc1CRE/+
				E9.5	292	73 (25.00%)	70 (23.97%)	86 (29.45%)	63 (21.58%)
				E10.5	42	9 (21.43%)	7 (16.67%)	12 (28.57%)	14 (33.33%)
				E11.5	43	6 (13.95%)	9 (20.93%)	14 (32.56%)	14 (32.56%)
				E12.5	233	34 (14.59%)	65 ( 27.90%)	64 (27.47%)	70 (30.04%)

## Sheet: Jag1Pdgfb
Lethality phase of Jagged1;TgPdgfb-iCreERT2 IRES GFP embryos. Genotypes obtained after breeding males Jag1flox/+TgPdgfb-iCreERT2 IRES GFP/+ with females Jag1 flox/ flox
	and Jag1flox/flox;TgPdgfb-iCreERT2 IRES GFP/+
				#total
					Jag1flox/flox;TgPdgfb-iCreERT2 IRES GFP1Cre	Jag1flox/flox;TgPdgfb-iCreERT2 IRES GFP+/+	Jag1flox/+; TgPdgfb-iCreERT2 IRES GFPCre	Jag1flox/+;TgPdgfb-iCreERT2 IRES GFP+/+
			E16.5	36(4)	16	15	2	3

## Sheet: Dll4Pdgfb
Lethality phase of Delta4;TgPdgfb-iCreERT2 IRES GFP embryos. Genotypes obtained after breeding males Delta4flox/+TgPdgfb-iCreERT2 IRES GFP/+ with females Delta4 flox/ flox
	and Delta4flox/flox;TgPdgfb-iCreERT2 IRES GFP/+
				#total
					Delta4flox/flox;TgPdgfb-iCreERT2 IRES GFP1Cre	Delta4flox/flox;TgPdgfb-iCreERT2 IRES GFP+/+	Delta4flox/+; TgPdgfb-iCreERT2 IRES GFPCre	Delta4flox/+;TgPdgfb-iCreERT2 IRES GFP+/+
			E16.5	37(9)	4	12	10	11

## Sheet: Dlll4Cdh5
			Lethality phase of Dll4;Cdh5-CreERT embryos. Genotypes obtained after breeding males Dll4flox/+;Cdh5CreERT/+ with females Dll4 flox/ flox.
					#total	Dll4flox/flox;Cdh5Cre/+	Dll4flox/flox; Cdh5+/+	Dll4flox/+;Cdh5Cre/+	Dll4flox/+; Cdh5+/+
				E14.5	4	1 (25.00%)	0 (0%)	1 (25%)	2 (25%)
				E15.5	321	47 (14.64%)	93 (28.97%)	86 (26.79%)	95 (29.60%)
				E16.5	53	6 (11.32%)	20 (37.74%)	13 (24.53%)	14 (26.42%)

## Sheet: ManicFringeTie2
			Lethality phase of ManicFringeGOF;Tie2-Cre embryos. Genotypes obtained after breeding males ManicFringeGOF/+;Tie2Cre/+ with females ManicFringeGOF/GOF
					#total	ManicFringeGOF/GOF;Tie2CRE/+	ManicFringeGof/GOF;Tie2+/+	ManicFringeGOF/+; Tie2Cre/+	ManicFringe+/+;Tie2+/+
				E13,5	46	13 (25.8%)	11 (23.91%)	9 (19.57%)	13 (28.26%)
				E14-E15,5	225	48 (21.33%)	60 (26.67%)	63 (28.00%)	54 (24.00%)
				E16,5	442	85 (19.23%)	110 (24.89%)	113 (25.57%)	134 (30.32%)
				P1	44	4 (9.09%)	20 (45.45%)	7 (15.91%)	13 (29.55%)

## Sheet: Efnb2Nfatc1
		Lethality phase of Efnb2;Nfatc1-Cre embryos. Genotypes obtained after breeding males Efnb2flox/+;Nfatc1Cre/+ with females Efnb2flox/ flox.
				#total	Efnb2flox/flox;	EfnB2flox/flox; Nfatc1+/+	Efnb2flox/+; Nfatc1CRE/+	Efnb2flox/+;
					Nfatc1CRE/+			Nfatc1+/+
			E9.5	14 (2)	3 (21.4%)	4 (18.7%)	3 (21.4%)	4 (28.6%)
			E11.5	8 (1)	2 (25.0%)	3 (37.5%)	1 (12.5%)	2 (25.0%)
			E12.5	11 (2)	2 (18.2%)	2 (11.0%)	5 (45.5%)	2 (18.2%)
			E13.5	67 (9)	12 (17.9%)	16 (23.9%)	13 (19.4%)	26 (38.8%)
			E14.5	62 (9)	16 (25.8%)	18 (29.0%)	11 (17.7%)	17 (27.4%)
			E15.5	245 (31)	57(23.3%)	60 (24.5%)	62 (25.3%)	66 (26.9%)
			E16.5	379 (53)	86 (22.7%)	101 (26.6%)	99 (26.1%)	93 (24.5%)
			E17.5	178 (23)	33 (18.5%)	55 (30.9%)	40 (22.5%)	50 (28.1%)
			P1	142 (20)	23 (16.2%)	35 (24.6%)	42 (29.6%)	42 (29.6%)
			P21	119	0 (0%)	35	42	42
