# Supplementary material for: Coronary arterial development is regulated by a Dll4-Jag1-EphrinB2 signaling cascade
Source: eLife. 2019 Dec 4;8:e49977. doi: 10.7554/eLife.49977 (PMC6917494; doi:10.7554/eLife.49977)
Supplement: Supplementary file 2. — Upregulated genes appear in red background and downregulated genes in blue. [file elife-49977-supp2.xlsx]

## Sheet: Jag1Nfatc1 211Deg
ID	logFC	adj.P.Val	mgi_symbol	description	gene_biotype	ensembl_transcript_id
ENSMUSG00000031762	3.07915	0.0288028	Mt2	metallothionein 2 [Source:MGI Symbol;Acc:MGI:97172]	protein_coding	ENSMUST00000034214
ENSMUSG00000031765	1.75013	0.0254929	Mt1	metallothionein 1 [Source:MGI Symbol;Acc:MGI:97171]	protein_coding	ENSMUST00000034215
ENSMUSG00000061723	1.65651	0.0224504	Tnnt3	troponin T3, skeletal, fast [Source:MGI Symbol;Acc:MGI:109550]	protein_coding	ENSMUST00000074187,ENSMUST00000078497,ENSMUST00000105941,ENSMUST00000105942,ENSMUST00000105943,ENSMUST00000105944,ENSMUST00000105945,ENSMUST00000105946,ENSMUST00000105947,ENSMUST00000105948,ENSMUST00000105949,ENSMUST00000105950,ENSMUST00000105952,ENSMUST00000105953,ENSMUST00000105954,ENSMUST00000105955,ENSMUST00000105957,ENSMUST00000105958,ENSMUST00000125649,ENSMUST00000128294,ENSMUST00000144259,…
ENSMUSG00000038242	1.61794	0.0322344	Aox4	aldehyde oxidase 4 [Source:MGI Symbol;Acc:MGI:1919122]	protein_coding	ENSMUST00000040442,ENSMUST00000159240,ENSMUST00000161833,ENSMUST00000161926,ENSMUST00000189059
ENSMUSG00000039114	1.60757	0.0353336	Nrn1	neuritin 1 [Source:MGI Symbol;Acc:MGI:1915654]	protein_coding	ENSMUST00000037623,ENSMUST00000122286
ENSMUSG00000056423	1.53217	0.0288028	Uts2b	urotensin 2B [Source:MGI Symbol;Acc:MGI:2677064]	protein_coding	ENSMUST00000070531
ENSMUSG00000050335	1.37741	0.0373729	Lgals3	lectin, galactose binding, soluble 3 [Source:MGI Symbol;Acc:MGI:96778]	protein_coding	ENSMUST00000142734,ENSMUST00000144794,ENSMUST00000146468,ENSMUST00000150290,ENSMUST00000151405
ENSMUSG00000032238	1.36374	0.046181	Rora	RAR-related orphan receptor alpha [Source:MGI Symbol;Acc:MGI:104661]	protein_coding	ENSMUST00000034766,ENSMUST00000113624,ENSMUST00000132355,ENSMUST00000140351,ENSMUST00000143507,ENSMUST00000174296
ENSMUSG00000035105	1.27837	0.0322344	Egln3	egl-9 family hypoxia-inducible factor 3 [Source:MGI Symbol;Acc:MGI:1932288]	protein_coding	ENSMUST00000039516
ENSMUSG00000030111	1.19222	0.0288028	A2m	alpha-2-macroglobulin [Source:MGI Symbol;Acc:MGI:2449119]	protein_coding	ENSMUST00000032203
ENSMUSG00000031297	1.16027	0.0422848	Slc7a3	solute carrier family 7 (cationic amino acid transporter, y+ system), member 3 [Source:MGI Symbol;Acc:MGI:1100521]	protein_coding	ENSMUST00000073927,ENSMUST00000101362,ENSMUST00000113710,ENSMUST00000126282,ENSMUST00000138162,ENSMUST00000144410,ENSMUST00000151922
ENSMUSG00000037161	1.15674	0.0224504	Mgarp	mitochondria localized glutamic acid rich protein [Source:MGI Symbol;Acc:MGI:1914999]	protein_coding	ENSMUST00000038154,ENSMUST00000108046,ENSMUST00000141156,ENSMUST00000145938,ENSMUST00000157054
ENSMUSG00000003153	1.14256	0.0438282	Slc2a3	solute carrier family 2 (facilitated glucose transporter), member 3 [Source:MGI Symbol;Acc:MGI:95757]	protein_coding	ENSMUST00000032476,ENSMUST00000165884,ENSMUST00000166135,ENSMUST00000168704,ENSMUST00000168801,ENSMUST00000169979,ENSMUST00000170724,ENSMUST00000171541
ENSMUSG00000035459	1.13781	0.0301349	Stab2	stabilin 2 [Source:MGI Symbol;Acc:MGI:2178743]	protein_coding	ENSMUST00000035288,ENSMUST00000099390,ENSMUST00000159023,ENSMUST00000159118,ENSMUST00000160580,ENSMUST00000161560,ENSMUST00000163045
ENSMUSG00000023951	1.10742	0.0479543	Vegfa	vascular endothelial growth factor A [Source:MGI Symbol;Acc:MGI:103178]	protein_coding	ENSMUST00000024747,ENSMUST00000071648,ENSMUST00000113519,ENSMUST00000113520,ENSMUST00000133605,ENSMUST00000142321,ENSMUST00000142351,ENSMUST00000143985,ENSMUST00000146149,ENSMUST00000150327,ENSMUST00000167860
ENSMUSG00000030428	1.04156	0.0358744	Ttyh1	tweety homolog 1 (Drosophila) [Source:MGI Symbol;Acc:MGI:1889007]	protein_coding	ENSMUST00000032594,ENSMUST00000079415,ENSMUST00000119661,ENSMUST00000126971,ENSMUST00000128317,ENSMUST00000129423,ENSMUST00000130150,ENSMUST00000132400,ENSMUST00000134536,ENSMUST00000139789,ENSMUST00000140637,ENSMUST00000148760,ENSMUST00000148951,ENSMUST00000151959,ENSMUST00000153673
ENSMUSG00000061576	1.02705	0.0254929	Dpp6	dipeptidylpeptidase 6 [Source:MGI Symbol;Acc:MGI:94921]	protein_coding	ENSMUST00000071500,ENSMUST00000101471,ENSMUST00000120555,ENSMUST00000122171,ENSMUST00000134175,ENSMUST00000136574,ENSMUST00000148039,ENSMUST00000149678
ENSMUSG00000097439	1.02449	0.047846	Gm16754	predicted gene, 16754 [Source:MGI Symbol;Acc:MGI:4439678]	lincRNA	ENSMUST00000181222
ENSMUSG00000040280	1.01566	0.0288028	Ndufa4l2	NADH dehydrogenase (ubiquinone) 1 alpha subcomplex, 4-like 2 [Source:MGI Symbol;Acc:MGI:3039567]	protein_coding	ENSMUST00000035735
ENSMUSG00000001494	0.990804	0.0132014	Sost	sclerostin [Source:MGI Symbol;Acc:MGI:1921749]	protein_coding	ENSMUST00000001534
ENSMUSG00000022579	0.96681	0.0480378	Gpihbp1	GPI-anchored HDL-binding protein 1 [Source:MGI Symbol;Acc:MGI:1915703]	protein_coding	ENSMUST00000023243,ENSMUST00000186934,ENSMUST00000189874,ENSMUST00000189944,ENSMUST00000190119
ENSMUSG00000009654	0.957644	0.031265	Oit3	oncoprotein induced transcript 3 [Source:MGI Symbol;Acc:MGI:1201782]	protein_coding	ENSMUST00000009798,ENSMUST00000162493
ENSMUSG00000079560	0.942161	0.0410327	Hoxa3	homeobox A3 [Source:MGI Symbol;Acc:MGI:96175]	protein_coding	ENSMUST00000114434,ENSMUST00000134831,ENSMUST00000142764,ENSMUST00000148446
ENSMUSG00000030046	0.904893	0.0288028	Bmp10	bone morphogenetic protein 10 [Source:MGI Symbol;Acc:MGI:1338820]	protein_coding	ENSMUST00000032125
ENSMUSG00000024164	0.893341	0.0358506	C3	complement component 3 [Source:MGI Symbol;Acc:MGI:88227]	protein_coding	ENSMUST00000024988,ENSMUST00000176457,ENSMUST00000177046,ENSMUST00000177425
ENSMUSG00000048249	0.851934	0.0464005	Crebrf	CREB3 regulatory factor [Source:MGI Symbol;Acc:MGI:1924378]	protein_coding	ENSMUST00000062519,ENSMUST00000132972,ENSMUST00000142539,ENSMUST00000144221,ENSMUST00000151681,ENSMUST00000176845
ENSMUSG00000042826	0.841505	0.0224504	Fgf11	fibroblast growth factor 11 [Source:MGI Symbol;Acc:MGI:109167]	protein_coding	ENSMUST00000011285,ENSMUST00000102585
ENSMUSG00000021831	0.840292	0.0412639	Ero1l	ERO1-like (S. cerevisiae) [Source:MGI Symbol;Acc:MGI:1354385]	protein_coding	ENSMUST00000022378
ENSMUSG00000022054	0.823854	0.046181	Nefm	neurofilament, medium polypeptide [Source:MGI Symbol;Acc:MGI:97314]	protein_coding	ENSMUST00000022638,ENSMUST00000111089
ENSMUSG00000031461	0.818337	0.0358744	Myom2	myomesin 2 [Source:MGI Symbol;Acc:MGI:1328358]	protein_coding	ENSMUST00000033842,ENSMUST00000131251,ENSMUST00000135393,ENSMUST00000135908,ENSMUST00000140033
ENSMUSG00000017390	0.801696	0.046181	Aldoc	aldolase C, fructose-bisphosphate [Source:MGI Symbol;Acc:MGI:101863]	protein_coding	ENSMUST00000017534,ENSMUST00000102478,ENSMUST00000124090,ENSMUST00000128032,ENSMUST00000148689,ENSMUST00000156039
ENSMUSG00000078566	0.795921	0.0288028	Bnip3	BCL2/adenovirus E1B interacting protein 3 [Source:MGI Symbol;Acc:MGI:109326]	protein_coding	ENSMUST00000106112,ENSMUST00000125359,ENSMUST00000130500,ENSMUST00000141223,ENSMUST00000148970
ENSMUSG00000022742	0.783311	0.0288028	Cpox	coproporphyrinogen oxidase [Source:MGI Symbol;Acc:MGI:104841]	protein_coding	ENSMUST00000060077
ENSMUSG00000038725	0.780949	0.0495677	Pkhd1l1	polycystic kidney and hepatic disease 1-like 1 [Source:MGI Symbol;Acc:MGI:2183153]	protein_coding	ENSMUST00000038336,ENSMUST00000166957
ENSMUSG00000053025	0.779272	0.0439384	Sv2b	synaptic vesicle glycoprotein 2 b [Source:MGI Symbol;Acc:MGI:1927338]	protein_coding	ENSMUST00000085164,ENSMUST00000165175
ENSMUSG00000035165	0.778651	0.0402078	Kcne3	potassium voltage-gated channel, Isk-related subfamily, gene 3 [Source:MGI Symbol;Acc:MGI:1891124]	protein_coding	ENSMUST00000049333,ENSMUST00000170954,ENSMUST00000178946,ENSMUST00000179842
ENSMUSG00000062515	0.768235	0.0476458	Fabp4	fatty acid binding protein 4, adipocyte [Source:MGI Symbol;Acc:MGI:88038]	protein_coding	ENSMUST00000029041
ENSMUSG00000079362	0.761357	0.046181	Gbp6	guanylate binding protein 6 [Source:MGI Symbol;Acc:MGI:2140937]	protein_coding	ENSMUST00000050011,ENSMUST00000065588
ENSMUSG00000052726	0.758426	0.0480378	Kcnt2	potassium channel, subfamily T, member 2 [Source:MGI Symbol;Acc:MGI:3036273]	protein_coding	ENSMUST00000060201,ENSMUST00000119786,ENSMUST00000120709,ENSMUST00000120796,ENSMUST00000145077,ENSMUST00000154966
ENSMUSG00000019916	0.752602	0.0439384	P4ha1	procollagen-proline, 2-oxoglutarate 4-dioxygenase (proline 4-hydroxylase), alpha 1 polypeptide [Source:MGI Symbol;Acc:MGI:97463]	protein_coding	ENSMUST00000009789,ENSMUST00000092512,ENSMUST00000105466
ENSMUSG00000032374	0.742678	0.014299	Plod2	procollagen lysine, 2-oxoglutarate 5-dioxygenase 2 [Source:MGI Symbol;Acc:MGI:1347007]	protein_coding	ENSMUST00000070522,ENSMUST00000160142,ENSMUST00000160359,ENSMUST00000161906,ENSMUST00000190075
ENSMUSG00000037818	0.737022	0.0439384	3110057O12Rik	RIKEN cDNA 3110057O12 gene [Source:MGI Symbol;Acc:MGI:1915468]	protein_coding	ENSMUST00000060415,ENSMUST00000108077,ENSMUST00000108078,ENSMUST00000159057,ENSMUST00000159227,ENSMUST00000159274,ENSMUST00000159421,ENSMUST00000159774,ENSMUST00000161111
ENSMUSG00000009876	0.732366	0.0457824	Cox4i2	cytochrome c oxidase subunit IV isoform 2 [Source:MGI Symbol;Acc:MGI:2135755]	protein_coding	ENSMUST00000010020,ENSMUST00000109821
ENSMUSG00000055493	0.730147	0.0479543	Epm2a	epilepsy, progressive myoclonic epilepsy, type 2 gene alpha [Source:MGI Symbol;Acc:MGI:1341085]	protein_coding	ENSMUST00000069106,ENSMUST00000161438
ENSMUSG00000061232	0.724166	0.0480378	H2-K1	histocompatibility 2, K1, K region [Source:MGI Symbol;Acc:MGI:95904]	protein_coding	ENSMUST00000025181,ENSMUST00000087189,ENSMUST00000114311,ENSMUST00000172782,ENSMUST00000172912,ENSMUST00000173075,ENSMUST00000173317,ENSMUST00000173543,ENSMUST00000173602
ENSMUSG00000042599	0.720375	0.0457487	Kdm7a	lysine (K)-specific demethylase 7A [Source:MGI Symbol;Acc:MGI:2443388]	protein_coding	ENSMUST00000002305,ENSMUST00000127036
ENSMUSG00000051811	0.717845	0.031265	Cox6b2	cytochrome c oxidase subunit VIb polypeptide 2 [Source:MGI Symbol;Acc:MGI:3044182]	protein_coding	ENSMUST00000063324,ENSMUST00000182048,ENSMUST00000182111,ENSMUST00000182173,ENSMUST00000182272,ENSMUST00000182738,ENSMUST00000183334,ENSMUST00000183971,ENSMUST00000184143
ENSMUSG00000063011	0.708191	0.0254929	Msln	mesothelin [Source:MGI Symbol;Acc:MGI:1888992]	protein_coding	ENSMUST00000075884
ENSMUSG00000028150	0.705653	0.046181	Rorc	RAR-related orphan receptor gamma [Source:MGI Symbol;Acc:MGI:104856]	protein_coding	ENSMUST00000029795,ENSMUST00000098877,ENSMUST00000107292,ENSMUST00000126783
ENSMUSG00000035566	0.699267	0.0288028	Pcdh17	protocadherin 17 [Source:MGI Symbol;Acc:MGI:2684924]	protein_coding	ENSMUST00000071370
ENSMUSG00000052353	0.695022	0.0254929	Cemip	cell migration inducing protein, hyaluronan binding [Source:MGI Symbol;Acc:MGI:2443629]	protein_coding	ENSMUST00000064174,ENSMUST00000142518,ENSMUST00000145171,ENSMUST00000147578,ENSMUST00000150495
ENSMUSG00000026100	0.692884	0.046181	Mstn	myostatin [Source:MGI Symbol;Acc:MGI:95691]	protein_coding	ENSMUST00000027269,ENSMUST00000191197
ENSMUSG00000041695	0.689166	0.0439384	Kcnj2	potassium inwardly-rectifying channel, subfamily J, member 2 [Source:MGI Symbol;Acc:MGI:104744]	protein_coding	ENSMUST00000042970
ENSMUSG00000020572	0.646925	0.0322344	Nampt	nicotinamide phosphoribosyltransferase [Source:MGI Symbol;Acc:MGI:1929865]	protein_coding	ENSMUST00000020886
ENSMUSG00000023886	0.645835	0.0428742	Smoc2	SPARC related modular calcium binding 2 [Source:MGI Symbol;Acc:MGI:1929881]	protein_coding	ENSMUST00000024660
ENSMUSG00000035992	0.629044	0.0420339	Fnip1	folliculin interacting protein 1 [Source:MGI Symbol;Acc:MGI:2444668]	protein_coding	ENSMUST00000046835,ENSMUST00000143650
ENSMUSG00000030653	0.628407	0.0456872	Pde2a	phosphodiesterase 2A, cGMP-stimulated [Source:MGI Symbol;Acc:MGI:2446107]	protein_coding	ENSMUST00000084894,ENSMUST00000163751,ENSMUST00000166652
ENSMUSG00000058443	0.608635	0.046181	Rpl10-ps3	ribosomal protein L10, pseudogene 3 [Source:MGI Symbol;Acc:MGI:3704336]	protein_coding	ENSMUST00000076364
ENSMUSG00000027070	0.607108	0.0254929	Lrp2	low density lipoprotein receptor-related protein 2 [Source:MGI Symbol;Acc:MGI:95794]	protein_coding	ENSMUST00000080953,ENSMUST00000092551,ENSMUST00000100051,ENSMUST00000128742
ENSMUSG00000025584	0.598954	0.0265516	Pde8a	phosphodiesterase 8A [Source:MGI Symbol;Acc:MGI:1277116]	protein_coding	ENSMUST00000026672,ENSMUST00000128154,ENSMUST00000130494
ENSMUSG00000005413	0.576457	0.0254929	Hmox1	heme oxygenase (decycling) 1 [Source:MGI Symbol;Acc:MGI:96163]	protein_coding	ENSMUST00000005548,ENSMUST00000159631,ENSMUST00000160341
ENSMUSG00000041075	0.559326	0.0102162	Fzd7	frizzled homolog 7 (Drosophila) [Source:MGI Symbol;Acc:MGI:108570]	protein_coding	ENSMUST00000114246
ENSMUSG00000027796	0.553569	0.0353336	Smad9	SMAD family member 9 [Source:MGI Symbol;Acc:MGI:1859993]	protein_coding	ENSMUST00000029371
ENSMUSG00000030772	0.552605	0.00493144	Dkk3	dickkopf homolog 3 (Xenopus laevis) [Source:MGI Symbol;Acc:MGI:1354952]	protein_coding	ENSMUST00000033036
ENSMUSG00000090698	0.534352	0.0358744	Apold1	apolipoprotein L domain containing 1 [Source:MGI Symbol;Acc:MGI:2685921]	protein_coding	ENSMUST00000167323
ENSMUSG00000027238	0.530752	0.0439384	Frmd5	FERM domain containing 5 [Source:MGI Symbol;Acc:MGI:2442557]	protein_coding	ENSMUST00000110592,ENSMUST00000110593,ENSMUST00000121219,ENSMUST00000128428,ENSMUST00000131092,ENSMUST00000133898,ENSMUST00000138157,ENSMUST00000142016,ENSMUST00000145075,ENSMUST00000153704,ENSMUST00000153932,ENSMUST00000155570
ENSMUSG00000035840	0.530706	0.047846	Lysmd3	LysM, putative peptidoglycan-binding, domain containing 3 [Source:MGI Symbol;Acc:MGI:1915906]	protein_coding	ENSMUST00000049055
ENSMUSG00000045690	0.504219	0.0457487	Wdr89	WD repeat domain 89 [Source:MGI Symbol;Acc:MGI:1919588]	protein_coding	ENSMUST00000062370,ENSMUST00000187307
ENSMUSG00000023087	0.50325	0.00537241	Ccrn4l	CCR4 carbon catabolite repression 4-like (S. cerevisiae) [Source:MGI Symbol;Acc:MGI:109382]	protein_coding	ENSMUST00000023849,ENSMUST00000144826,ENSMUST00000167780
ENSMUSG00000006494	0.502977	0.00558126	Pdk1	pyruvate dehydrogenase kinase, isoenzyme 1 [Source:MGI Symbol;Acc:MGI:1926119]	protein_coding	ENSMUST00000006669,ENSMUST00000129427,ENSMUST00000129887,ENSMUST00000134362,ENSMUST00000148249,ENSMUST00000151358,ENSMUST00000152696,ENSMUST00000156036
ENSMUSG00000062901	0.502727	0.04657	Klhl24	kelch-like 24 [Source:MGI Symbol;Acc:MGI:1923035]	protein_coding	ENSMUST00000023509
ENSMUSG00000020300	0.501218	0.046181	Cpeb4	cytoplasmic polyadenylation element binding protein 4 [Source:MGI Symbol;Acc:MGI:1914829]	protein_coding	ENSMUST00000020543,ENSMUST00000109412,ENSMUST00000155278
ENSMUSG00000045294	0.500737	0.0430241	Insig1	insulin induced gene 1 [Source:MGI Symbol;Acc:MGI:1916289]	protein_coding	ENSMUST00000059155
ENSMUSG00000060961	0.497189	0.031265	Slc4a4	solute carrier family 4 (anion exchanger), member 4 [Source:MGI Symbol;Acc:MGI:1927555]	protein_coding	ENSMUST00000113216,ENSMUST00000113218,ENSMUST00000130041,ENSMUST00000134303,ENSMUST00000135283,ENSMUST00000144713,ENSMUST00000148750,ENSMUST00000156238
ENSMUSG00000039004	0.484675	0.0288028	Bmp6	bone morphogenetic protein 6 [Source:MGI Symbol;Acc:MGI:88182]	protein_coding	ENSMUST00000171970
ENSMUSG00000040447	0.483203	0.0358506	Spns2	spinster homolog 2 [Source:MGI Symbol;Acc:MGI:2384936]	protein_coding	ENSMUST00000045303,ENSMUST00000126452,ENSMUST00000129274,ENSMUST00000144940,ENSMUST00000147418,ENSMUST00000150491
ENSMUSG00000024597	0.479388	0.0430241	Slc12a2	solute carrier family 12, member 2 [Source:MGI Symbol;Acc:MGI:101924]	protein_coding	ENSMUST00000115366
ENSMUSG00000039145	0.474591	0.0495677	Camk1d	calcium/calmodulin-dependent protein kinase ID [Source:MGI Symbol;Acc:MGI:2442190]	protein_coding	ENSMUST00000044009,ENSMUST00000114987,ENSMUST00000130470,ENSMUST00000155927
ENSMUSG00000079445	0.470898	0.0480378	B3gnt7	UDP-GlcNAc:betaGal beta-1,3-N-acetylglucosaminyltransferase 7 [Source:MGI Symbol;Acc:MGI:2384394]	protein_coding	ENSMUST00000113306,ENSMUST00000188695,ENSMUST00000189618
ENSMUSG00000028527	0.463702	0.0322344	Ak4	adenylate kinase 4 [Source:MGI Symbol;Acc:MGI:87979]	protein_coding	ENSMUST00000102780,ENSMUST00000106945,ENSMUST00000106946,ENSMUST00000131397,ENSMUST00000133055,ENSMUST00000151561,ENSMUST00000155749
ENSMUSG00000020263	0.460794	0.0495677	Appl2	adaptor protein, phosphotyrosine interaction, PH domain and leucine zipper containing 2 [Source:MGI Symbol;Acc:MGI:2384914]	protein_coding	ENSMUST00000020500,ENSMUST00000127788,ENSMUST00000130285,ENSMUST00000133719,ENSMUST00000141048,ENSMUST00000146876,ENSMUST00000147118,ENSMUST00000147582,ENSMUST00000148096,ENSMUST00000150351,ENSMUST00000150685,ENSMUST00000176294,ENSMUST00000176675,ENSMUST00000177187
ENSMUSG00000042742	0.452872	0.0495677	B630005N14Rik	RIKEN cDNA B630005N14 gene [Source:MGI Symbol;Acc:MGI:2141466]	protein_coding	ENSMUST00000045235
ENSMUSG00000042842	0.445181	0.0224504	Serpinb6b	serine (or cysteine) peptidase inhibitor, clade B, member 6b [Source:MGI Symbol;Acc:MGI:894688]	protein_coding	ENSMUST00000017184,ENSMUST00000110293,ENSMUST00000164541
ENSMUSG00000025880	0.44511	0.0433789	Smad7	SMAD family member 7 [Source:MGI Symbol;Acc:MGI:1100518]	protein_coding	ENSMUST00000026999,ENSMUST00000168918,ENSMUST00000172718,ENSMUST00000174411,ENSMUST00000174843
ENSMUSG00000037434	0.445056	0.0224504	Slc30a1	solute carrier family 30 (zinc transporter), member 1 [Source:MGI Symbol;Acc:MGI:1345281]	protein_coding	ENSMUST00000044954,ENSMUST00000161756
ENSMUSG00000024378	0.436921	0.0358506	Stard4	StAR-related lipid transfer (START) domain containing 4 [Source:MGI Symbol;Acc:MGI:2156764]	protein_coding	ENSMUST00000025236,ENSMUST00000118990,ENSMUST00000119991,ENSMUST00000141617
ENSMUSG00000087579	0.433705	0.0422848	1500017E21Rik	RIKEN cDNA 1500017E21 gene [Source:MGI Symbol;Acc:MGI:1919243]	processed_transcript	ENSMUST00000128603,ENSMUST00000129953,ENSMUST00000142067,ENSMUST00000144045,ENSMUST00000146407,ENSMUST00000147754,ENSMUST00000149601,ENSMUST00000150138
ENSMUSG00000062151	0.432445	0.0457824	Unc13c	unc-13 homolog C (C. elegans) [Source:MGI Symbol;Acc:MGI:2149021]	protein_coding	ENSMUST00000075245,ENSMUST00000184666
ENSMUSG00000029752	0.432134	0.0495677	Asns	asparagine synthetase [Source:MGI Symbol;Acc:MGI:1350929]	protein_coding	ENSMUST00000031766,ENSMUST00000115542,ENSMUST00000126303,ENSMUST00000133972,ENSMUST00000139596,ENSMUST00000140097,ENSMUST00000148349
ENSMUSG00000070867	0.432031	0.0457487	Trabd2b	TraB domain containing 2B [Source:MGI Symbol;Acc:MGI:3650152]	protein_coding	ENSMUST00000094894
ENSMUSG00000021069	0.425588	0.0420339	Pygl	liver glycogen phosphorylase [Source:MGI Symbol;Acc:MGI:97829]	protein_coding	ENSMUST00000071250,ENSMUST00000161083,ENSMUST00000161840,ENSMUST00000162613,ENSMUST00000166609
ENSMUSG00000028630	0.41613	0.0358506	Dyrk2	dual-specificity tyrosine-(Y)-phosphorylation regulated kinase 2 [Source:MGI Symbol;Acc:MGI:1330301]	protein_coding	ENSMUST00000004281
ENSMUSG00000022051	0.41597	0.0457824	Bnip3l	BCL2/adenovirus E1B interacting protein 3-like [Source:MGI Symbol;Acc:MGI:1332659]	protein_coding	ENSMUST00000022634,ENSMUST00000111115,ENSMUST00000129605,ENSMUST00000135703,ENSMUST00000138160,ENSMUST00000142593,ENSMUST00000151059
ENSMUSG00000027381	0.413942	0.046181	Bcl2l11	BCL2-like 11 (apoptosis facilitator) [Source:MGI Symbol;Acc:MGI:1197519]	protein_coding	ENSMUST00000019281,ENSMUST00000089634,ENSMUST00000103210,ENSMUST00000103211,ENSMUST00000110341,ENSMUST00000129206,ENSMUST00000132201,ENSMUST00000146023
ENSMUSG00000026674	0.409141	0.0457487	Ddr2	discoidin domain receptor family, member 2 [Source:MGI Symbol;Acc:MGI:1345277]	protein_coding	ENSMUST00000027985,ENSMUST00000170800
ENSMUSG00000035967	0.404067	0.0467433	Ddx26b	DEAD/H (Asp-Glu-Ala-Asp/His) box polypeptide 26B [Source:MGI Symbol;Acc:MGI:2442593]	protein_coding	ENSMUST00000039374,ENSMUST00000101553,ENSMUST00000132428,ENSMUST00000134138,ENSMUST00000142624,ENSMUST00000143142,ENSMUST00000186445
ENSMUSG00000016458	0.40225	0.0456872	Wt1	Wilms tumor 1 homolog [Source:MGI Symbol;Acc:MGI:98968]	protein_coding	ENSMUST00000111098,ENSMUST00000111099,ENSMUST00000133470,ENSMUST00000139585,ENSMUST00000143043,ENSMUST00000145107,ENSMUST00000146842,ENSMUST00000153944
ENSMUSG00000031488	0.397703	0.0456872	Rab11fip1	RAB11 family interacting protein 1 (class I) [Source:MGI Symbol;Acc:MGI:1923017]	protein_coding	ENSMUST00000033878,ENSMUST00000054212
ENSMUSG00000004319	0.396238	0.046181	Clcn3	chloride channel 3 [Source:MGI Symbol;Acc:MGI:103555]	protein_coding	ENSMUST00000004430,ENSMUST00000056508,ENSMUST00000093490,ENSMUST00000110301,ENSMUST00000110302,ENSMUST00000129672,ENSMUST00000132234,ENSMUST00000145493,ENSMUST00000145741,ENSMUST00000147824
ENSMUSG00000052539	0.393505	0.047846	Magi3	membrane associated guanylate kinase, WW and PDZ domain containing 3 [Source:MGI Symbol;Acc:MGI:1923484]	protein_coding	ENSMUST00000064371,ENSMUST00000121198,ENSMUST00000122303
ENSMUSG00000032289	0.393061	0.0422848	Thsd4	thrombospondin, type I, domain containing 4 [Source:MGI Symbol;Acc:MGI:2672033]	protein_coding	ENSMUST00000034829,ENSMUST00000098660,ENSMUST00000126347,ENSMUST00000140824,ENSMUST00000146099,ENSMUST00000171654
ENSMUSG00000039891	0.37765	0.0457824	Txlnb	taxilin beta [Source:MGI Symbol;Acc:MGI:2671945]	protein_coding	ENSMUST00000037964,ENSMUST00000175676
ENSMUSG00000022253	0.375707	0.031265	Nadk2	NAD kinase 2, mitochondrial [Source:MGI Symbol;Acc:MGI:1915896]	protein_coding	ENSMUST00000067760,ENSMUST00000100789,ENSMUST00000100790,ENSMUST00000186069,ENSMUST00000188194,ENSMUST00000189211,ENSMUST00000189437,ENSMUST00000190591,ENSMUST00000190874
ENSMUSG00000003031	0.374109	0.0325746	Cdkn1b	cyclin-dependent kinase inhibitor 1B [Source:MGI Symbol;Acc:MGI:104565]	protein_coding	ENSMUST00000003115,ENSMUST00000067327
ENSMUSG00000030788	0.372003	0.0480378	Rnf141	ring finger protein 141 [Source:MGI Symbol;Acc:MGI:1914400]	protein_coding	ENSMUST00000106682,ENSMUST00000148367,ENSMUST00000175648,ENSMUST00000175981,ENSMUST00000176048,ENSMUST00000176210,ENSMUST00000176716,ENSMUST00000176746,ENSMUST00000177236,ENSMUST00000177462,ENSMUST00000177520
ENSMUSG00000041685	0.366515	0.0467433	Fcho2	FCH domain only 2 [Source:MGI Symbol;Acc:MGI:3505790]	protein_coding	ENSMUST00000040340,ENSMUST00000099277,ENSMUST00000109403,ENSMUST00000179563
ENSMUSG00000038668	0.356386	0.0428742	Lpar1	lysophosphatidic acid receptor 1 [Source:MGI Symbol;Acc:MGI:108429]	protein_coding	ENSMUST00000055018,ENSMUST00000107570,ENSMUST00000107571,ENSMUST00000107574,ENSMUST00000107575,ENSMUST00000145361,ENSMUST00000147354,ENSMUST00000155170
ENSMUSG00000044712	0.35489	0.0495677	Slc38a6	solute carrier family 38, member 6 [Source:MGI Symbol;Acc:MGI:3648156]	protein_coding	ENSMUST00000058139,ENSMUST00000101313,ENSMUST00000122920,ENSMUST00000126488,ENSMUST00000134247,ENSMUST00000140523,ENSMUST00000150996,ENSMUST00000153941
ENSMUSG00000040297	0.353048	0.0457487	Suco	SUN domain containing ossification factor [Source:MGI Symbol;Acc:MGI:2138346]	protein_coding	ENSMUST00000048377
ENSMUSG00000010066	0.344726	0.046181	Cacna2d2	calcium channel, voltage-dependent, alpha 2/delta subunit 2 [Source:MGI Symbol;Acc:MGI:1929813]	protein_coding	ENSMUST00000010210,ENSMUST00000085092,ENSMUST00000164988,ENSMUST00000166799,ENSMUST00000168532,ENSMUST00000168959,ENSMUST00000169354,ENSMUST00000170737,ENSMUST00000171809
ENSMUSG00000042302	0.344587	0.031265	Ehbp1	EH domain binding protein 1 [Source:MGI Symbol;Acc:MGI:2667252]	protein_coding	ENSMUST00000045167,ENSMUST00000109563,ENSMUST00000134293,ENSMUST00000136762,ENSMUST00000137594,ENSMUST00000152372,ENSMUST00000180360
ENSMUSG00000002944	0.339485	0.046181	Cd36	CD36 antigen [Source:MGI Symbol;Acc:MGI:107899]	protein_coding	ENSMUST00000082367,ENSMUST00000165232,ENSMUST00000169095,ENSMUST00000170051
ENSMUSG00000028289	0.338666	0.0457487	Epha7	Eph receptor A7 [Source:MGI Symbol;Acc:MGI:95276]	protein_coding	ENSMUST00000029964,ENSMUST00000080934,ENSMUST00000108191,ENSMUST00000108194,ENSMUST00000129029,ENSMUST00000129912,ENSMUST00000136827,ENSMUST00000149030
ENSMUSG00000051790	0.324148	0.0457487	Nlgn2	neuroligin 2 [Source:MGI Symbol;Acc:MGI:2681835]	protein_coding	ENSMUST00000056484,ENSMUST00000108634,ENSMUST00000139893,ENSMUST00000140477
ENSMUSG00000027589	0.318909	0.047846	Pcmtd2	protein-L-isoaspartate (D-aspartate) O-methyltransferase domain containing 2 [Source:MGI Symbol;Acc:MGI:1923927]	protein_coding	ENSMUST00000029116,ENSMUST00000108754,ENSMUST00000122811,ENSMUST00000124346,ENSMUST00000137893,ENSMUST00000139434,ENSMUST00000142989,ENSMUST00000145475,ENSMUST00000155970
ENSMUSG00000037826	0.317923	0.046181	Ppm1k	protein phosphatase 1K (PP2C domain containing) [Source:MGI Symbol;Acc:MGI:2442111]	protein_coding	ENSMUST00000042766
ENSMUSG00000037306	0.309899	0.0428795	Man1c1	mannosidase, alpha, class 1C, member 1 [Source:MGI Symbol;Acc:MGI:2446214]	protein_coding	ENSMUST00000038628,ENSMUST00000054096,ENSMUST00000176606
ENSMUSG00000040732	0.309665	0.0495677	Erg	avian erythroblastosis virus E-26 (v-ets) oncogene related [Source:MGI Symbol;Acc:MGI:95415]	protein_coding	ENSMUST00000077773,ENSMUST00000113846,ENSMUST00000113848,ENSMUST00000118113,ENSMUST00000121809,ENSMUST00000122199,ENSMUST00000171646,ENSMUST00000176345,ENSMUST00000177450
ENSMUSG00000020866	0.308522	0.0495677	Cacna1g	calcium channel, voltage-dependent, T type, alpha 1G subunit [Source:MGI Symbol;Acc:MGI:1201678]	protein_coding	ENSMUST00000021234,ENSMUST00000100561,ENSMUST00000103166,ENSMUST00000107785,ENSMUST00000107786,ENSMUST00000107788,ENSMUST00000107789,ENSMUST00000107790,ENSMUST00000107791,ENSMUST00000107792,ENSMUST00000107793,ENSMUST00000133000,ENSMUST00000133331,ENSMUST00000142190,ENSMUST00000146160,ENSMUST00000152811
ENSMUSG00000005220	0.306566	0.046181	Corin	corin [Source:MGI Symbol;Acc:MGI:1349451]	protein_coding	ENSMUST00000005352,ENSMUST00000167460,ENSMUST00000175766,ENSMUST00000176320,ENSMUST00000176439,ENSMUST00000176974,ENSMUST00000177290
ENSMUSG00000021215	0.305754	0.046181	Net1	neuroepithelial cell transforming gene 1 [Source:MGI Symbol;Acc:MGI:1927138]	protein_coding	ENSMUST00000091853,ENSMUST00000099946
ENSMUSG00000047412	0.305708	0.046181	Zbtb44	zinc finger and BTB domain containing 44 [Source:MGI Symbol;Acc:MGI:1925123]	protein_coding	ENSMUST00000115222,ENSMUST00000167346
ENSMUSG00000022462	0.294731	0.045108	Slc38a2	solute carrier family 38, member 2 [Source:MGI Symbol;Acc:MGI:1915010]	protein_coding	ENSMUST00000023099
ENSMUSG00000028381	0.293196	0.0402078	Ugcg	UDP-glucose ceramide glucosyltransferase [Source:MGI Symbol;Acc:MGI:1332243]	protein_coding	ENSMUST00000030074,ENSMUST00000128227,ENSMUST00000133996,ENSMUST00000155153
ENSMUSG00000036377	0.292054	0.0301349	C530008M17Rik	RIKEN cDNA C530008M17 gene [Source:MGI Symbol;Acc:MGI:2444817]	protein_coding	ENSMUST00000086909,ENSMUST00000120639,ENSMUST00000120818,ENSMUST00000121160,ENSMUST00000121851,ENSMUST00000125922,ENSMUST00000128112,ENSMUST00000149216,ENSMUST00000151567,ENSMUST00000152373,ENSMUST00000163347,ENSMUST00000187287
ENSMUSG00000018425	0.287223	0.0457824	Dhx40	DEAH (Asp-Glu-Ala-His) box polypeptide 40 [Source:MGI Symbol;Acc:MGI:1914737]	protein_coding	ENSMUST00000018569,ENSMUST00000131798,ENSMUST00000136977,ENSMUST00000148263
ENSMUSG00000063015	0.285988	0.0467433	Ccni	cyclin I [Source:MGI Symbol;Acc:MGI:1341077]	protein_coding	ENSMUST00000058550,ENSMUST00000123033,ENSMUST00000144514,ENSMUST00000151568
ENSMUSG00000034205	0.282158	0.0325746	Loxl2	lysyl oxidase-like 2 [Source:MGI Symbol;Acc:MGI:2137913]	protein_coding	ENSMUST00000022660,ENSMUST00000100420
ENSMUSG00000045414	0.280484	0.0412639	1190002N15Rik	RIKEN cDNA 1190002N15 gene [Source:MGI Symbol;Acc:MGI:1916111]	protein_coding	ENSMUST00000113028
ENSMUSG00000016386	0.271444	0.0480378	Mpped2	metallophosphoesterase domain containing 2 [Source:MGI Symbol;Acc:MGI:1924265]	protein_coding	ENSMUST00000016530,ENSMUST00000111063,ENSMUST00000124461,ENSMUST00000125023,ENSMUST00000133401,ENSMUST00000144155
ENSMUSG00000016319	-0.21387	0.0480378	Slc25a5	solute carrier family 25 (mitochondrial carrier, adenine nucleotide translocator), member 5 [Source:MGI Symbol;Acc:MGI:1353496]	protein_coding	ENSMUST00000016463,ENSMUST00000126608,ENSMUST00000156672
ENSMUSG00000028633	-0.22826	0.0457487	Ctps	cytidine 5'-triphosphate synthase [Source:MGI Symbol;Acc:MGI:1858304]	protein_coding	ENSMUST00000030381,ENSMUST00000140891,ENSMUST00000147980
ENSMUSG00000074088	-0.23811	0.0495677	Snrnp40	small nuclear ribonucleoprotein 40 (U5) [Source:MGI Symbol;Acc:MGI:1913835]	protein_coding	ENSMUST00000105994,ENSMUST00000180577,ENSMUST00000181161,ENSMUST00000181560
ENSMUSG00000030603	-0.245754	0.0457487	Psmc4	proteasome (prosome, macropain) 26S subunit, ATPase, 4 [Source:MGI Symbol;Acc:MGI:1346093]	protein_coding	ENSMUST00000032824,ENSMUST00000126528,ENSMUST00000134486,ENSMUST00000135482,ENSMUST00000138512,ENSMUST00000140053
ENSMUSG00000025580	-0.255911	0.0439384	Eif4a3	eukaryotic translation initiation factor 4A3 [Source:MGI Symbol;Acc:MGI:1923731]	protein_coding	ENSMUST00000026667,ENSMUST00000106253,ENSMUST00000129044,ENSMUST00000134743,ENSMUST00000135294,ENSMUST00000138849
ENSMUSG00000039994	-0.261404	0.047846	Timeless	timeless circadian clock 1 [Source:MGI Symbol;Acc:MGI:1321393]	protein_coding	ENSMUST00000055539,ENSMUST00000105240,ENSMUST00000105242,ENSMUST00000105243,ENSMUST00000105244,ENSMUST00000105245,ENSMUST00000125289,ENSMUST00000129147,ENSMUST00000135376,ENSMUST00000135538,ENSMUST00000136854,ENSMUST00000142149,ENSMUST00000142484,ENSMUST00000145710,ENSMUST00000146945
ENSMUSG00000013629	-0.262408	0.046181	Cad	carbamoyl-phosphate synthetase 2, aspartate transcarbamylase, and dihydroorotase [Source:MGI Symbol;Acc:MGI:1916969]	protein_coding	ENSMUST00000013773,ENSMUST00000031049,ENSMUST00000114646,ENSMUST00000126382,ENSMUST00000137541,ENSMUST00000139994,ENSMUST00000148145,ENSMUST00000152004,ENSMUST00000152509,ENSMUST00000155001,ENSMUST00000170329,ENSMUST00000174367
ENSMUSG00000056201	-0.267559	0.0439384	Cfl1	cofilin 1, non-muscle [Source:MGI Symbol;Acc:MGI:101757]	protein_coding	ENSMUST00000116560
ENSMUSG00000036054	-0.269795	0.046181	Sugp2	SURP and G patch domain containing 2 [Source:MGI Symbol;Acc:MGI:2678085]	protein_coding	ENSMUST00000093458,ENSMUST00000126239,ENSMUST00000129402,ENSMUST00000130492,ENSMUST00000131489,ENSMUST00000133924,ENSMUST00000135640,ENSMUST00000136391,ENSMUST00000136758,ENSMUST00000145078,ENSMUST00000148378,ENSMUST00000155771,ENSMUST00000156330,ENSMUST00000164403
ENSMUSG00000042541	-0.276523	0.0358506	Shfm1	split hand/foot malformation (ectrodactyly) type 1 [Source:MGI Symbol;Acc:MGI:109238]	protein_coding	ENSMUST00000041111
ENSMUSG00000029147	-0.279316	0.0301349	Ppm1g	protein phosphatase 1G (formerly 2C), magnesium-dependent, gamma isoform [Source:MGI Symbol;Acc:MGI:106065]	protein_coding	ENSMUST00000031032
ENSMUSG00000031683	-0.282594	0.0325746	Lsm6	LSM6 homolog, U6 small nuclear RNA associated (S. cerevisiae) [Source:MGI Symbol;Acc:MGI:1925901]	protein_coding	ENSMUST00000051867,ENSMUST00000126174,ENSMUST00000130325,ENSMUST00000146824
ENSMUSG00000006095	-0.283472	0.0457487	Tbcb	tubulin folding cofactor B [Source:MGI Symbol;Acc:MGI:1913661]	protein_coding	ENSMUST00000006254,ENSMUST00000141608,ENSMUST00000169358
ENSMUSG00000037664	-0.28399	0.0480378	Cdkn1c	cyclin-dependent kinase inhibitor 1C (P57) [Source:MGI Symbol;Acc:MGI:104564]	protein_coding	ENSMUST00000037287,ENSMUST00000167912
ENSMUSG00000028622	-0.284832	0.0325746	Mrpl37	mitochondrial ribosomal protein L37 [Source:MGI Symbol;Acc:MGI:1926268]	protein_coding	ENSMUST00000030365,ENSMUST00000125157,ENSMUST00000125397,ENSMUST00000138788,ENSMUST00000141150
ENSMUSG00000034192	-0.288125	0.046181	Lsm3	LSM3 homolog, U6 small nuclear RNA associated (S. cerevisiae) [Source:MGI Symbol;Acc:MGI:1914928]	protein_coding	ENSMUST00000040607,ENSMUST00000123569,ENSMUST00000126253
ENSMUSG00000059791	-0.289013	0.0439384	Nrm	nurim (nuclear envelope membrane protein) [Source:MGI Symbol;Acc:MGI:2146855]	protein_coding	ENSMUST00000074259,ENSMUST00000172931,ENSMUST00000174873
ENSMUSG00000028318	-0.291765	0.0495677	Polr1e	polymerase (RNA) I polypeptide E [Source:MGI Symbol;Acc:MGI:1929022]	protein_coding	ENSMUST00000029999,ENSMUST00000054723,ENSMUST00000107814,ENSMUST00000133157,ENSMUST00000149284,ENSMUST00000150663,ENSMUST00000153252
ENSMUSG00000026879	-0.292053	0.047846	Gsn	gelsolin [Source:MGI Symbol;Acc:MGI:95851]	protein_coding	ENSMUST00000028239,ENSMUST00000124323,ENSMUST00000139867,ENSMUST00000142324
ENSMUSG00000041476	-0.293113	0.0353336	Smpx	small muscle protein, X-linked [Source:MGI Symbol;Acc:MGI:1913356]	protein_coding	ENSMUST00000038007,ENSMUST00000112520,ENSMUST00000112521,ENSMUST00000126418,ENSMUST00000132805,ENSMUST00000136141,ENSMUST00000147283,ENSMUST00000190091
ENSMUSG00000024644	-0.296964	0.046181	Cndp2	CNDP dipeptidase 2 (metallopeptidase M20 family) [Source:MGI Symbol;Acc:MGI:1913304]	protein_coding	ENSMUST00000025546,ENSMUST00000168419
ENSMUSG00000033020	-0.297851	0.040984	Polr2f	polymerase (RNA) II (DNA directed) polypeptide F [Source:MGI Symbol;Acc:MGI:1349393]	protein_coding	ENSMUST00000040077
ENSMUSG00000059741	-0.298076	0.0428742	Myl3	myosin, light polypeptide 3 [Source:MGI Symbol;Acc:MGI:97268]	protein_coding	ENSMUST00000079784,ENSMUST00000124267,ENSMUST00000136695,ENSMUST00000153142
ENSMUSG00000035754	-0.30471	0.0395929	Wdr18	WD repeat domain 18 [Source:MGI Symbol;Acc:MGI:2158400]	protein_coding	ENSMUST00000045247
ENSMUSG00000062421	-0.306923	0.0457487	Arf2	ADP-ribosylation factor 2 [Source:MGI Symbol;Acc:MGI:99595]	protein_coding	ENSMUST00000057921,ENSMUST00000063347,ENSMUST00000153092,ENSMUST00000154089
ENSMUSG00000035439	-0.306969	0.046181	Haus8	4HAUS augmin-like complex, subunit 8 [Source:MGI Symbol;Acc:MGI:1923728]	protein_coding	ENSMUST00000035960,ENSMUST00000110071,ENSMUST00000123495,ENSMUST00000128833,ENSMUST00000129455,ENSMUST00000134361,ENSMUST00000144726,ENSMUST00000157039
ENSMUSG00000022945	-0.307699	0.047846	Chaf1b	chromatin assembly factor 1, subunit B (p60) [Source:MGI Symbol;Acc:MGI:1314881]	protein_coding	ENSMUST00000023666,ENSMUST00000117099,ENSMUST00000120586,ENSMUST00000124313,ENSMUST00000128316,ENSMUST00000142316,ENSMUST00000143006,ENSMUST00000152980
ENSMUSG00000037570	-0.308519	0.0495677	Mcrs1	microspherule protein 1 [Source:MGI Symbol;Acc:MGI:1858420]	protein_coding	ENSMUST00000041190,ENSMUST00000163506
ENSMUSG00000028773	-0.309861	0.0457487	Fabp3	fatty acid binding protein 3, muscle and heart [Source:MGI Symbol;Acc:MGI:95476]	protein_coding	ENSMUST00000070532
ENSMUSG00000037740	-0.316065	0.0439384	Mrps26	mitochondrial ribosomal protein S26 [Source:MGI Symbol;Acc:MGI:1333830]	protein_coding	ENSMUST00000046149,ENSMUST00000145614
ENSMUSG00000060098	-0.322297	0.0480378	Prmt7	protein arginine N-methyltransferase 7 [Source:MGI Symbol;Acc:MGI:2384879]	protein_coding	ENSMUST00000071592,ENSMUST00000109296,ENSMUST00000109297,ENSMUST00000128201,ENSMUST00000134151,ENSMUST00000147063,ENSMUST00000153272
ENSMUSG00000015365	-0.324566	0.0428742	Mov10l1	Moloney leukemia virus 10-like 1 [Source:MGI Symbol;Acc:MGI:1891384]	protein_coding	ENSMUST00000015509,ENSMUST00000143030,ENSMUST00000146993,ENSMUST00000148198,ENSMUST00000156949
ENSMUSG00000050856	-0.331583	0.0465852	Atp5k	ATP synthase, H+ transporting, mitochondrial F1F0 complex, subunit E [Source:MGI Symbol;Acc:MGI:106636]	protein_coding	ENSMUST00000049628,ENSMUST00000118632,ENSMUST00000123184
ENSMUSG00000063694	-0.331717	0.0358506	Cycs	cytochrome c, somatic [Source:MGI Symbol;Acc:MGI:88578]	protein_coding	ENSMUST00000077766,ENSMUST00000161401
ENSMUSG00000021604	-0.334314	0.0480378	Irx4	Iroquois related homeobox 4 (Drosophila) [Source:MGI Symbol;Acc:MGI:1355275]	protein_coding	ENSMUST00000022095,ENSMUST00000176684
ENSMUSG00000004951	-0.336075	0.0480378	Hspb1	heat shock protein 1 [Source:MGI Symbol;Acc:MGI:96240]	protein_coding	ENSMUST00000005077,ENSMUST00000111155
ENSMUSG00000002068	-0.340402	0.0479543	Ccne1	cyclin E1 [Source:MGI Symbol;Acc:MGI:88316]	protein_coding	ENSMUST00000108023,ENSMUST00000124979,ENSMUST00000128785,ENSMUST00000130329,ENSMUST00000137097
ENSMUSG00000018845	-0.360556	0.0254929	Unc45b	unc-45 homolog B (C. elegans) [Source:MGI Symbol;Acc:MGI:2443377]	protein_coding	ENSMUST00000018989,ENSMUST00000108160,ENSMUST00000125499,ENSMUST00000142336,ENSMUST00000164945
ENSMUSG00000062694	-0.372774	0.0322344	Cav3	caveolin 3 [Source:MGI Symbol;Acc:MGI:107570]	protein_coding	ENSMUST00000075477
ENSMUSG00000074797	-0.374128	0.047846	Itpa	inosine triphosphatase (nucleoside triphosphate pyrophosphatase) [Source:MGI Symbol;Acc:MGI:96622]	protein_coding	ENSMUST00000103193,ENSMUST00000126714,ENSMUST00000133328,ENSMUST00000138963,ENSMUST00000156382
ENSMUSG00000035783	-0.374553	0.046181	Acta2	actin, alpha 2, smooth muscle, aorta [Source:MGI Symbol;Acc:MGI:87909]	protein_coding	ENSMUST00000039631
ENSMUSG00000016758	-0.376146	0.0483034	Bik	BCL2-interacting killer [Source:MGI Symbol;Acc:MGI:1206591]	protein_coding	ENSMUST00000016902
ENSMUSG00000005299	-0.38092	0.0457487	Letm1	leucine zipper-EF-hand containing transmembrane protein 1 [Source:MGI Symbol;Acc:MGI:1932557]	protein_coding	ENSMUST00000005431,ENSMUST00000144071,ENSMUST00000148451,ENSMUST00000149886
ENSMUSG00000070699	-0.385731	0.0456872	Sars2	seryl-aminoacyl-tRNA synthetase 2 [Source:MGI Symbol;Acc:MGI:1919234]	protein_coding	ENSMUST00000094632
ENSMUSG00000079677	-0.387556	0.0479543	Fdx1l	ferredoxin 1-like [Source:MGI Symbol;Acc:MGI:1915415]	protein_coding	ENSMUST00000010348
ENSMUSG00000021136	-0.38817	0.0439384	Smoc1	SPARC related modular calcium binding 1 [Source:MGI Symbol;Acc:MGI:1929878]	protein_coding	ENSMUST00000021564,ENSMUST00000110347,ENSMUST00000129362
ENSMUSG00000050503	-0.389386	0.0428978	Fbxl22	F-box and leucine-rich repeat protein 22 [Source:MGI Symbol;Acc:MGI:1921415]	protein_coding	ENSMUST00000056890
ENSMUSG00000058806	-0.391978	0.0325746	Col13a1	collagen, type XIII, alpha 1 [Source:MGI Symbol;Acc:MGI:1277201]	protein_coding	ENSMUST00000051826,ENSMUST00000105451,ENSMUST00000105452,ENSMUST00000105453,ENSMUST00000105454,ENSMUST00000145469,ENSMUST00000153120
ENSMUSG00000027364	-0.392888	0.0467433	Usp50	ubiquitin specific peptidase 50 [Source:MGI Symbol;Acc:MGI:1922333]	protein_coding	ENSMUST00000028842,ENSMUST00000099423,ENSMUST00000130356,ENSMUST00000136319,ENSMUST00000145194,ENSMUST00000151140
ENSMUSG00000002007	-0.398471	0.031265	Srpk3	serine/arginine-rich protein specific kinase 3 [Source:MGI Symbol;Acc:MGI:1891338]	protein_coding	ENSMUST00000002081,ENSMUST00000136664,ENSMUST00000137045,ENSMUST00000139630
ENSMUSG00000025792	-0.402392	0.046181	Slc25a10	solute carrier family 25 (mitochondrial carrier, dicarboxylate transporter), member 10 [Source:MGI Symbol;Acc:MGI:1353497]	protein_coding	ENSMUST00000026899,ENSMUST00000123373,ENSMUST00000127349,ENSMUST00000138874,ENSMUST00000144706,ENSMUST00000152187
ENSMUSG00000027004	-0.410408	0.0457487	Frzb	frizzled-related protein [Source:MGI Symbol;Acc:MGI:892032]	protein_coding	ENSMUST00000028389,ENSMUST00000142459
ENSMUSG00000069171	-0.41708	0.047846	Nr2f1	nuclear receptor subfamily 2, group F, member 1 [Source:MGI Symbol;Acc:MGI:1352451]	protein_coding	ENSMUST00000091458,ENSMUST00000125176,ENSMUST00000127137,ENSMUST00000135284,ENSMUST00000150498
ENSMUSG00000051851	-0.418283	0.0481104	Cxx1c	CAAX box 1C [Source:MGI Symbol;Acc:MGI:1920115]	protein_coding	ENSMUST00000063384
ENSMUSG00000037601	-0.418991	0.0254929	Nme1	NME/NM23 nucleoside diphosphate kinase 1 [Source:MGI Symbol;Acc:MGI:97355]	protein_coding	ENSMUST00000021220,ENSMUST00000107844,ENSMUST00000135884
ENSMUSG00000063564	-0.421358	0.014299	Col23a1	collagen, type XXIII, alpha 1 [Source:MGI Symbol;Acc:MGI:2653243]	protein_coding	ENSMUST00000102765,ENSMUST00000151098
ENSMUSG00000034845	-0.426634	0.0428742	Plvap	plasmalemma vesicle associated protein [Source:MGI Symbol;Acc:MGI:1890497]	protein_coding	ENSMUST00000048452
ENSMUSG00000020524	-0.430791	0.0457824	Gria1	glutamate receptor, ionotropic, AMPA1 (alpha 1) [Source:MGI Symbol;Acc:MGI:95808]	protein_coding	ENSMUST00000036315,ENSMUST00000094179,ENSMUST00000125292,ENSMUST00000151045,ENSMUST00000173531
ENSMUSG00000007877	-0.43788	0.0457487	Tcap	titin-cap [Source:MGI Symbol;Acc:MGI:1330233]	protein_coding	ENSMUST00000008021
ENSMUSG00000048007	-0.441265	0.0288028	Timm8a1	translocase of inner mitochondrial membrane 8A1 [Source:MGI Symbol;Acc:MGI:1353433]	protein_coding	ENSMUST00000054213
ENSMUSG00000024008	-0.468861	0.0438282	Cpne5	copine V [Source:MGI Symbol;Acc:MGI:2385908]	protein_coding	ENSMUST00000024805,ENSMUST00000124917,ENSMUST00000126755,ENSMUST00000126993,ENSMUST00000137727
ENSMUSG00000022490	-0.474402	0.0265516	Ppp1r1a	protein phosphatase 1, regulatory (inhibitor) subunit 1A [Source:MGI Symbol;Acc:MGI:1889595]	protein_coding	ENSMUST00000023133
ENSMUSG00000001313	-0.482481	0.046181	Rnd2	Rho family GTPase 2 [Source:MGI Symbol;Acc:MGI:1338755]	protein_coding	ENSMUST00000001347,ENSMUST00000134980,ENSMUST00000153185
ENSMUSG00000080893	-0.493582	0.0373729	Gm15920	predicted gene 15920 [Source:MGI Symbol;Acc:MGI:3801934]	pseudogene	ENSMUST00000118998
ENSMUSG00000039057	-0.501359	0.046181	Myo16	myosin XVI [Source:MGI Symbol;Acc:MGI:2685951]	protein_coding	ENSMUST00000042103
ENSMUSG00000027254	-0.502918	0.0465852	Map1a	microtubule-associated protein 1 A [Source:MGI Symbol;Acc:MGI:1306776]	protein_coding	ENSMUST00000094639,ENSMUST00000110639,ENSMUST00000131901,ENSMUST00000133283
ENSMUSG00000022658	-0.526278	0.046181	Tagln3	transgelin 3 [Source:MGI Symbol;Acc:MGI:1926784]	protein_coding	ENSMUST00000096057
ENSMUSG00000013936	-0.537516	0.00558126	Myl2	myosin, light polypeptide 2, regulatory, cardiac, slow [Source:MGI Symbol;Acc:MGI:97272]	protein_coding	ENSMUST00000014080,ENSMUST00000111750,ENSMUST00000111751,ENSMUST00000123913,ENSMUST00000126006,ENSMUST00000139213,ENSMUST00000146733,ENSMUST00000147178,ENSMUST00000150535,ENSMUST00000152744,ENSMUST00000153816,ENSMUST00000155612
ENSMUSG00000014773	-0.557206	0.0296994	Dll1	delta-like 1 (Drosophila) [Source:MGI Symbol;Acc:MGI:104659]	protein_coding	ENSMUST00000014917,ENSMUST00000124196,ENSMUST00000129395,ENSMUST00000140784,ENSMUST00000143460,ENSMUST00000152416
ENSMUSG00000101939	-0.564076	0.00558126			pseudogene	ENSMUST00000188299
ENSMUSG00000080875	-0.589116	0.046181	Gm7332	predicted gene 7332 [Source:MGI Symbol;Acc:MGI:3643344]	pseudogene	ENSMUST00000118351
ENSMUSG00000069516	-0.601652	0.0288028	Lyz2	lysozyme 2 [Source:MGI Symbol;Acc:MGI:96897]	protein_coding	ENSMUST00000092163
ENSMUSG00000098132	-0.63179	0.0467433	Rassf10	Ras association (RalGDS/AF-6) domain family (N-terminal) member 10 [Source:MGI Symbol;Acc:MGI:1925998]	protein_coding	ENSMUST00000182858
ENSMUSG00000027377	-0.669158	0.047846	Mall	mal, T cell differentiation protein-like [Source:MGI Symbol;Acc:MGI:2385152]	protein_coding	ENSMUST00000028856
ENSMUSG00000032744	-0.788585	0.0224504	Heyl	hairy/enhancer-of-split related with YRPW motif-like [Source:MGI Symbol;Acc:MGI:1860511]	protein_coding	ENSMUST00000040821,ENSMUST00000127172,ENSMUST00000151870
ENSMUSG00000027887	-0.792036	0.046181	Sypl2	synaptophysin-like 2 [Source:MGI Symbol;Acc:MGI:1328311]	protein_coding	ENSMUST00000029486,ENSMUST00000141387,ENSMUST00000156371
ENSMUSG00000027276	-0.832658	0.00677751	Jag1	jagged 1 [Source:MGI Symbol;Acc:MGI:1095416]	protein_coding	ENSMUST00000028735,ENSMUST00000133640
ENSMUSG00000024935	-0.870625	0.0438282	Slc1a1	solute carrier family 1 (neuronal/epithelial high affinity glutamate transporter, system Xag), member 1 [Source:MGI Symbol;Acc:MGI:105083]	protein_coding	ENSMUST00000025875,ENSMUST00000160702,ENSMUST00000161119,ENSMUST00000161340,ENSMUST00000162189
ENSMUSG00000010825	-1.08049	0.0467433	Grid2ip	glutamate receptor, ionotropic, delta 2 (Grid2) interacting protein 1 [Source:MGI Symbol;Acc:MGI:2176213]	protein_coding	ENSMUST00000010969,ENSMUST00000110733,ENSMUST00000120825,ENSMUST00000138948
ENSMUSG00000031849	-1.10095	0.0457487	Comp	cartilage oligomeric matrix protein [Source:MGI Symbol;Acc:MGI:88469]	protein_coding	ENSMUST00000003659
ENSMUSG00000082935	-5.54281	0.00493144	Gm7658	predicted gene 7658 [Source:MGI Symbol;Acc:MGI:3648029]	pseudogene	ENSMUST00000119064

## Sheet: Dll4Nfatc1 274Deg
ID	logFC	adj.P.Val	mgi_symbol	description	gene_biotype	ensembl_transcript_id
ENSMUSG00000058922	10.0919	0.0247175	Gm10052	predicted pseudogene 10052 [Source:MGI Symbol;Acc:MGI:3704348]	pseudogene	ENSMUST00000168019
ENSMUSG00000057886	6.95429	0.00988627	Gm6984	predicted gene 6984 [Source:MGI Symbol;Acc:MGI:3646710]	pseudogene	ENSMUST00000181108
ENSMUSG00000083261	5.7799	0.0013347	Gm7816	predicted pseudogene 7816 [Source:MGI Symbol;Acc:MGI:3646286]	pseudogene	ENSMUST00000119884
ENSMUSG00000071562	5.01187	0.0393896	Stfa1	stefin A1 [Source:MGI Symbol;Acc:MGI:106198]	protein_coding	ENSMUST00000042097
ENSMUSG00000031762	4.58745	0.00177552	Mt2	metallothionein 2 [Source:MGI Symbol;Acc:MGI:97172]	protein_coding	ENSMUST00000034214
ENSMUSG00000031765	2.96238	0.000967488	Mt1	metallothionein 1 [Source:MGI Symbol;Acc:MGI:97171]	protein_coding	ENSMUST00000034215
ENSMUSG00000074912	2.48057	0.0162428	Gm14207	predicted gene 14207 [Source:MGI Symbol;Acc:MGI:3649550]	processed_transcript	ENSMUST00000124439,ENSMUST00000147929,ENSMUST00000156538
ENSMUSG00000005125	2.2101	0.00157278	Ndrg1	N-myc downstream regulated gene 1 [Source:MGI Symbol;Acc:MGI:1341799]	protein_coding	ENSMUST00000005256,ENSMUST00000163496,ENSMUST00000164070,ENSMUST00000164675,ENSMUST00000165966,ENSMUST00000166420,ENSMUST00000167817,ENSMUST00000168542,ENSMUST00000168979,ENSMUST00000170903,ENSMUST00000171266,ENSMUST00000171569,ENSMUST00000172447
ENSMUSG00000030103	2.18457	0.0013347	Bhlhe40	basic helix-loop-helix family, member e40 [Source:MGI Symbol;Acc:MGI:1097714]	protein_coding	ENSMUST00000032194,ENSMUST00000163617,ENSMUST00000166346
ENSMUSG00000048489	2.13118	0.0248966	8430408G22Rik	RIKEN cDNA 8430408G22 gene [Source:MGI Symbol;Acc:MGI:1918730]	protein_coding	ENSMUST00000067354,ENSMUST00000178241
ENSMUSG00000004267	2.06721	0.027447	Eno2	enolase 2, gamma neuronal [Source:MGI Symbol;Acc:MGI:95394]	protein_coding	ENSMUST00000004378,ENSMUST00000112476,ENSMUST00000125436,ENSMUST00000127274,ENSMUST00000128598,ENSMUST00000128701,ENSMUST00000135626,ENSMUST00000138770,ENSMUST00000139763,ENSMUST00000146712,ENSMUST00000147004,ENSMUST00000147307,ENSMUST00000149652,ENSMUST00000151214,ENSMUST00000156033
ENSMUSG00000030790	1.87574	0.0013347	Adm	adrenomedullin [Source:MGI Symbol;Acc:MGI:108058]	protein_coding	ENSMUST00000033054,ENSMUST00000185766,ENSMUST00000186620
ENSMUSG00000035165	1.86675	0.0356398	Kcne3	potassium voltage-gated channel, Isk-related subfamily, gene 3 [Source:MGI Symbol;Acc:MGI:1891124]	protein_coding	ENSMUST00000049333,ENSMUST00000170954,ENSMUST00000178946,ENSMUST00000179842
ENSMUSG00000009350	1.81971	0.0467829	Mpo	myeloperoxidase [Source:MGI Symbol;Acc:MGI:97137]	protein_coding	ENSMUST00000020779,ENSMUST00000107930,ENSMUST00000121303,ENSMUST00000143021,ENSMUST00000146650,ENSMUST00000167903
ENSMUSG00000009654	1.8041	0.0013347	Oit3	oncoprotein induced transcript 3 [Source:MGI Symbol;Acc:MGI:1201782]	protein_coding	ENSMUST00000009798,ENSMUST00000162493
ENSMUSG00000035459	1.72659	0.0175234	Stab2	stabilin 2 [Source:MGI Symbol;Acc:MGI:2178743]	protein_coding	ENSMUST00000035288,ENSMUST00000099390,ENSMUST00000159023,ENSMUST00000159118,ENSMUST00000160580,ENSMUST00000161560,ENSMUST00000163045
ENSMUSG00000035105	1.65347	0.0199687	Egln3	egl-9 family hypoxia-inducible factor 3 [Source:MGI Symbol;Acc:MGI:1932288]	protein_coding	ENSMUST00000039516
ENSMUSG00000053175	1.64079	0.0260037	Bcl3	B cell leukemia/lymphoma 3 [Source:MGI Symbol;Acc:MGI:88140]	protein_coding	ENSMUST00000120537,ENSMUST00000123375,ENSMUST00000135609,ENSMUST00000139680,ENSMUST00000141996,ENSMUST00000146194,ENSMUST00000152768
ENSMUSG00000003541	1.63465	0.00157278	Ier3	immediate early response 3 [Source:MGI Symbol;Acc:MGI:104814]	protein_coding	ENSMUST00000003635
ENSMUSG00000025498	1.62767	0.02979	Irf7	interferon regulatory factor 7 [Source:MGI Symbol;Acc:MGI:1859212]	protein_coding	ENSMUST00000026571,ENSMUST00000097952,ENSMUST00000106023,ENSMUST00000123525,ENSMUST00000127161,ENSMUST00000127223,ENSMUST00000131399,ENSMUST00000146373,ENSMUST00000148414,ENSMUST00000155744,ENSMUST00000156938
ENSMUSG00000032373	1.62288	0.0393896	Car12	carbonic anyhydrase 12 [Source:MGI Symbol;Acc:MGI:1923709]	protein_coding	ENSMUST00000071889,ENSMUST00000085420,ENSMUST00000123195,ENSMUST00000134829,ENSMUST00000152011
ENSMUSG00000045999	1.59785	0.0150533	AY036118	cDNA sequence AY036118 [Source:MGI Symbol;Acc:MGI:2158419]	pseudogene	ENSMUST00000062783
ENSMUSG00000042116	1.59396	0.0206098	Vwa1	von Willebrand factor A domain containing 1 [Source:MGI Symbol;Acc:MGI:2179729]	protein_coding	ENSMUST00000042196
ENSMUSG00000030111	1.46714	0.0229882	A2m	alpha-2-macroglobulin [Source:MGI Symbol;Acc:MGI:2449119]	protein_coding	ENSMUST00000032203
ENSMUSG00000030159	1.44189	0.0260252	Clec1b	C-type lectin domain family 1, member b [Source:MGI Symbol;Acc:MGI:1913287]	protein_coding	ENSMUST00000032262,ENSMUST00000112079,ENSMUST00000112081,ENSMUST00000133061
ENSMUSG00000020303	1.40453	0.0364321	Stc2	stanniocalcin 2 [Source:MGI Symbol;Acc:MGI:1316731]	protein_coding	ENSMUST00000020546,ENSMUST00000134199,ENSMUST00000139991,ENSMUST00000149467,ENSMUST00000152094
ENSMUSG00000030653	1.35145	0.0123788	Pde2a	phosphodiesterase 2A, cGMP-stimulated [Source:MGI Symbol;Acc:MGI:2446107]	protein_coding	ENSMUST00000084894,ENSMUST00000163751,ENSMUST00000166652
ENSMUSG00000052821	1.3479	0.0393896	Cysltr1	cysteinyl leukotriene receptor 1 [Source:MGI Symbol;Acc:MGI:1926218]	protein_coding	ENSMUST00000064892,ENSMUST00000113480
ENSMUSG00000037161	1.33299	0.0348194	Mgarp	mitochondria localized glutamic acid rich protein [Source:MGI Symbol;Acc:MGI:1914999]	protein_coding	ENSMUST00000038154,ENSMUST00000108046,ENSMUST00000141156,ENSMUST00000145938,ENSMUST00000157054
ENSMUSG00000038550	1.29474	0.0376374	Ciart	circadian associated repressor of transcription [Source:MGI Symbol;Acc:MGI:2684975]	protein_coding	ENSMUST00000036418,ENSMUST00000159739,ENSMUST00000159863,ENSMUST00000161866,ENSMUST00000161867,ENSMUST00000161994
ENSMUSG00000005089	1.27989	0.0261045	Slc1a2	solute carrier family 1 (glial high affinity glutamate transporter), member 2 [Source:MGI Symbol;Acc:MGI:101931]	protein_coding	ENSMUST00000005220,ENSMUST00000080210,ENSMUST00000111212,ENSMUST00000111213,ENSMUST00000123759,ENSMUST00000125085,ENSMUST00000128622,ENSMUST00000136221,ENSMUST00000136488,ENSMUST00000137466,ENSMUST00000145921,ENSMUST00000154446
ENSMUSG00000023951	1.26222	0.00177552	Vegfa	vascular endothelial growth factor A [Source:MGI Symbol;Acc:MGI:103178]	protein_coding	ENSMUST00000024747,ENSMUST00000071648,ENSMUST00000113519,ENSMUST00000113520,ENSMUST00000133605,ENSMUST00000142321,ENSMUST00000142351,ENSMUST00000143985,ENSMUST00000146149,ENSMUST00000150327,ENSMUST00000167860
ENSMUSG00000029095	1.22853	0.0377685	Ablim2	actin-binding LIM protein 2 [Source:MGI Symbol;Acc:MGI:2385758]	protein_coding	ENSMUST00000054598,ENSMUST00000101280,ENSMUST00000114203,ENSMUST00000114204,ENSMUST00000114205,ENSMUST00000114206,ENSMUST00000114210,ENSMUST00000125378,ENSMUST00000129347,ENSMUST00000130209,ENSMUST00000130233,ENSMUST00000135885,ENSMUST00000150146,ENSMUST00000151322,ENSMUST00000151636,ENSMUST00000153025,ENSMUST00000153529
ENSMUSG00000010064	1.22202	0.0390817	Slc38a3	solute carrier family 38, member 3 [Source:MGI Symbol;Acc:MGI:1923507]	protein_coding	ENSMUST00000010208,ENSMUST00000167868,ENSMUST00000177567
ENSMUSG00000032860	1.21252	0.0456359	P2ry2	purinergic receptor P2Y, G-protein coupled 2 [Source:MGI Symbol;Acc:MGI:105107]	protein_coding	ENSMUST00000037540,ENSMUST00000178340
ENSMUSG00000032238	1.21058	0.0199687	Rora	RAR-related orphan receptor alpha [Source:MGI Symbol;Acc:MGI:104661]	protein_coding	ENSMUST00000034766,ENSMUST00000113624,ENSMUST00000132355,ENSMUST00000140351,ENSMUST00000143507,ENSMUST00000174296
ENSMUSG00000022876	1.17928	0.0248966	Samsn1	SAM domain, SH3 domain and nuclear localization signals, 1 [Source:MGI Symbol;Acc:MGI:1914992]	protein_coding	ENSMUST00000114239,ENSMUST00000114240,ENSMUST00000139691,ENSMUST00000147447,ENSMUST00000150248
ENSMUSG00000035385	1.16471	0.0260252	Ccl2	chemokine (C-C motif) ligand 2 [Source:MGI Symbol;Acc:MGI:98259]	protein_coding	ENSMUST00000000193,ENSMUST00000124479
ENSMUSG00000066026	1.15754	0.00157278	Dhrs3	dehydrogenase/reductase (SDR family) member 3 [Source:MGI Symbol;Acc:MGI:1315215]	protein_coding	ENSMUST00000084184,ENSMUST00000105744,ENSMUST00000128926,ENSMUST00000133265,ENSMUST00000142808,ENSMUST00000154208,ENSMUST00000171001
ENSMUSG00000079362	1.15253	0.0260252	Gbp6	guanylate binding protein 6 [Source:MGI Symbol;Acc:MGI:2140937]	protein_coding	ENSMUST00000050011,ENSMUST00000065588
ENSMUSG00000004939	1.14424	0.0188769	Nmrk2	nicotinamide riboside kinase 2 [Source:MGI Symbol;Acc:MGI:1916814]	protein_coding	ENSMUST00000005069
ENSMUSG00000034738	1.1195	0.0348194	Nostrin	nitric oxide synthase trafficker [Source:MGI Symbol;Acc:MGI:3606242]	protein_coding	ENSMUST00000041865,ENSMUST00000141276
ENSMUSG00000003153	1.10082	0.0377685	Slc2a3	solute carrier family 2 (facilitated glucose transporter), member 3 [Source:MGI Symbol;Acc:MGI:95757]	protein_coding	ENSMUST00000032476,ENSMUST00000165884,ENSMUST00000166135,ENSMUST00000168704,ENSMUST00000168801,ENSMUST00000169979,ENSMUST00000170724,ENSMUST00000171541
ENSMUSG00000020108	1.07676	0.00443465	Ddit4	DNA-damage-inducible transcript 4 [Source:MGI Symbol;Acc:MGI:1921997]	protein_coding	ENSMUST00000020308
ENSMUSG00000038884	1.07666	0.0254184	A230050P20Rik	RIKEN cDNA A230050P20 gene [Source:MGI Symbol;Acc:MGI:2441788]	protein_coding	ENSMUST00000043911,ENSMUST00000175820,ENSMUST00000176142,ENSMUST00000176990,ENSMUST00000177067
ENSMUSG00000030256	1.07603	0.00504698	Bhlhe41	basic helix-loop-helix family, member e41 [Source:MGI Symbol;Acc:MGI:1930704]	protein_coding	ENSMUST00000032386,ENSMUST00000111703
ENSMUSG00000025408	1.07234	0.0190094	Ddit3	DNA-damage inducible transcript 3 [Source:MGI Symbol;Acc:MGI:109247]	protein_coding	ENSMUST00000026475,ENSMUST00000134686,ENSMUST00000139091
ENSMUSG00000030157	1.05346	0.0466395	Clec2d	C-type lectin domain family 2, member d [Source:MGI Symbol;Acc:MGI:2135589]	protein_coding	ENSMUST00000032260
ENSMUSG00000025902	1.04342	0.0239263	Sox17	SRY (sex determining region Y)-box 17 [Source:MGI Symbol;Acc:MGI:107543]	protein_coding	ENSMUST00000027035,ENSMUST00000116652
ENSMUSG00000072902	1.03615	0.043817	Gm10435	predicted gene 10435 [Source:MGI Symbol;Acc:MGI:3642820]	antisense	ENSMUST00000101162,ENSMUST00000162526
ENSMUSG00000020178	1.01743	0.0404144	Adora2a	adenosine A2a receptor [Source:MGI Symbol;Acc:MGI:99402]	protein_coding	ENSMUST00000105420
ENSMUSG00000078566	1.00729	0.0240036	Bnip3	BCL2/adenovirus E1B interacting protein 3 [Source:MGI Symbol;Acc:MGI:109326]	protein_coding	ENSMUST00000106112,ENSMUST00000125359,ENSMUST00000130500,ENSMUST00000141223,ENSMUST00000148970
ENSMUSG00000046718	1.00202	0.0409117	Bst2	bone marrow stromal cell antigen 2 [Source:MGI Symbol;Acc:MGI:1916800]	protein_coding	ENSMUST00000051672
ENSMUSG00000033880	1.00047	0.0437883	Lgals3bp	lectin, galactoside-binding, soluble, 3 binding protein [Source:MGI Symbol;Acc:MGI:99554]	protein_coding	ENSMUST00000043722,ENSMUST00000106290,ENSMUST00000127054,ENSMUST00000141459,ENSMUST00000144529
ENSMUSG00000039377	0.998689	0.0437883	Hlx	H2.0-like homeobox [Source:MGI Symbol;Acc:MGI:96109]	protein_coding	ENSMUST00000048572,ENSMUST00000174257
ENSMUSG00000018906	0.952499	0.0224706	P4ha2	procollagen-proline, 2-oxoglutarate 4-dioxygenase (proline 4-hydroxylase), alpha II polypeptide [Source:MGI Symbol;Acc:MGI:894286]	protein_coding	ENSMUST00000019050,ENSMUST00000093107,ENSMUST00000125132,ENSMUST00000125651,ENSMUST00000126840,ENSMUST00000129499,ENSMUST00000135596,ENSMUST00000135653,ENSMUST00000138477,ENSMUST00000139315,ENSMUST00000141258,ENSMUST00000142583,ENSMUST00000151218,ENSMUST00000155299,ENSMUST00000174616
ENSMUSG00000018554	0.9483	0.0229882	Ybx2	Y box protein 2 [Source:MGI Symbol;Acc:MGI:1096372]	protein_coding	ENSMUST00000018698,ENSMUST00000108601,ENSMUST00000130377,ENSMUST00000148395,ENSMUST00000149194
ENSMUSG00000047180	0.947423	0.0393896	Neurl3	neuralized homolog 3 homolog (Drosophila) [Source:MGI Symbol;Acc:MGI:2429944]	protein_coding	ENSMUST00000056946,ENSMUST00000188666
ENSMUSG00000000628	0.938101	0.0240036	Hk2	hexokinase 2 [Source:MGI Symbol;Acc:MGI:1315197]	protein_coding	ENSMUST00000000642,ENSMUST00000168725,ENSMUST00000169270,ENSMUST00000170833
ENSMUSG00000068874	0.936628	0.0472395	Selenbp1	selenium binding protein 1 [Source:MGI Symbol;Acc:MGI:96825]	protein_coding	ENSMUST00000090839,ENSMUST00000134202,ENSMUST00000139949,ENSMUST00000140757,ENSMUST00000145551,ENSMUST00000153720
ENSMUSG00000043421	0.906369	0.02976	Hilpda	hypoxia inducible lipid droplet associated [Source:MGI Symbol;Acc:MGI:1916823]	protein_coding	ENSMUST00000054445,ENSMUST00000115289
ENSMUSG00000037405	0.903006	0.0114314	Icam1	intercellular adhesion molecule 1 [Source:MGI Symbol;Acc:MGI:96392]	protein_coding	ENSMUST00000086399
ENSMUSG00000061740	0.895059	0.0229882	Cyp2d22	cytochrome P450, family 2, subfamily d, polypeptide 22 [Source:MGI Symbol;Acc:MGI:1929474]	protein_coding	ENSMUST00000023083
ENSMUSG00000022754	0.894523	0.0224706	Tmem45a	transmembrane protein 45a [Source:MGI Symbol;Acc:MGI:1913122]	protein_coding	ENSMUST00000023435,ENSMUST00000135672,ENSMUST00000148452
ENSMUSG00000059824	0.892921	0.0274966	Dbp	D site albumin promoter binding protein [Source:MGI Symbol;Acc:MGI:94866]	protein_coding	ENSMUST00000080885,ENSMUST00000107740,ENSMUST00000107741,ENSMUST00000123587,ENSMUST00000155439
ENSMUSG00000019850	0.881609	0.0224706	Tnfaip3	tumor necrosis factor, alpha-induced protein 3 [Source:MGI Symbol;Acc:MGI:1196377]	protein_coding	ENSMUST00000019997,ENSMUST00000105527,ENSMUST00000122863,ENSMUST00000146388,ENSMUST00000154590,ENSMUST00000154749
ENSMUSG00000046447	0.870018	0.0248966	Camk2n1	calcium/calmodulin-dependent protein kinase II inhibitor 1 [Source:MGI Symbol;Acc:MGI:1913509]	protein_coding	ENSMUST00000050918
ENSMUSG00000042622	0.868382	0.0409117	Maff	v-maf musculoaponeurotic fibrosarcoma oncogene family, protein F (avian) [Source:MGI Symbol;Acc:MGI:96910]	protein_coding	ENSMUST00000096350,ENSMUST00000163691
ENSMUSG00000044197	0.84501	0.0102178	Gpr146	G protein-coupled receptor 146 [Source:MGI Symbol;Acc:MGI:1933113]	protein_coding	ENSMUST00000051293,ENSMUST00000053120,ENSMUST00000100514,ENSMUST00000137254,ENSMUST00000138631,ENSMUST00000188655
ENSMUSG00000074652	0.835916	0.0364321	Myh7b	myosin, heavy chain 7B, cardiac muscle, beta [Source:MGI Symbol;Acc:MGI:3710243]	protein_coding	ENSMUST00000092995,ENSMUST00000124415,ENSMUST00000154656
ENSMUSG00000018169	0.826714	0.0437883	Mfng	MFNG O-fucosylpeptide 3-beta-N-acetylglucosaminyltransferase [Source:MGI Symbol;Acc:MGI:1095404]	protein_coding	ENSMUST00000018313,ENSMUST00000123518,ENSMUST00000128389,ENSMUST00000136795
ENSMUSG00000021831	0.820164	0.0239263	Ero1l	ERO1-like (S. cerevisiae) [Source:MGI Symbol;Acc:MGI:1354385]	protein_coding	ENSMUST00000022378
ENSMUSG00000019970	0.818109	0.00661836	Sgk1	serum/glucocorticoid regulated kinase 1 [Source:MGI Symbol;Acc:MGI:1340062]	protein_coding	ENSMUST00000020145,ENSMUST00000092673,ENSMUST00000100036,ENSMUST00000120509,ENSMUST00000124203,ENSMUST00000124350,ENSMUST00000126560,ENSMUST00000135195,ENSMUST00000141218,ENSMUST00000142174,ENSMUST00000143094,ENSMUST00000150089,ENSMUST00000164659
ENSMUSG00000020937	0.817528	0.0178898	Plcd3	phospholipase C, delta 3 [Source:MGI Symbol;Acc:MGI:107451]	protein_coding	ENSMUST00000103077,ENSMUST00000124740,ENSMUST00000128650,ENSMUST00000142970,ENSMUST00000143012
ENSMUSG00000067279	0.803785	0.0123788	Ppp1r3c	protein phosphatase 1, regulatory (inhibitor) subunit 3C [Source:MGI Symbol;Acc:MGI:1858229]	protein_coding	ENSMUST00000087321
ENSMUSG00000026773	0.802593	0.0356398	Pfkfb3	6-phosphofructo-2-kinase/fructose-2,6-biphosphatase 3 [Source:MGI Symbol;Acc:MGI:2181202]	protein_coding	ENSMUST00000028114,ENSMUST00000049849,ENSMUST00000100411,ENSMUST00000114844,ENSMUST00000114845,ENSMUST00000114846,ENSMUST00000140580,ENSMUST00000144921,ENSMUST00000145970,ENSMUST00000150086,ENSMUST00000155167,ENSMUST00000170196,ENSMUST00000171188,ENSMUST00000179584,ENSMUST00000183869
ENSMUSG00000027339	0.789366	0.0466377	Rassf2	Ras association (RalGDS/AF-6) domain family member 2 [Source:MGI Symbol;Acc:MGI:2442060]	protein_coding	ENSMUST00000028814,ENSMUST00000103182,ENSMUST00000139047,ENSMUST00000140791,ENSMUST00000155829
ENSMUSG00000037379	0.779815	0.00942067	Spon2	spondin 2, extracellular matrix protein [Source:MGI Symbol;Acc:MGI:1923724]	protein_coding	ENSMUST00000046186
ENSMUSG00000019916	0.777367	0.00157278	P4ha1	procollagen-proline, 2-oxoglutarate 4-dioxygenase (proline 4-hydroxylase), alpha 1 polypeptide [Source:MGI Symbol;Acc:MGI:97463]	protein_coding	ENSMUST00000009789,ENSMUST00000092512,ENSMUST00000105466
ENSMUSG00000045294	0.776201	0.0248445	Insig1	insulin induced gene 1 [Source:MGI Symbol;Acc:MGI:1916289]	protein_coding	ENSMUST00000059155
ENSMUSG00000020889	0.753116	0.0342749	Nr1d1	nuclear receptor subfamily 1, group D, member 1 [Source:MGI Symbol;Acc:MGI:2444210]	protein_coding	ENSMUST00000064941,ENSMUST00000139220
ENSMUSG00000029385	0.75058	0.0248966	Ccng2	cyclin G2 [Source:MGI Symbol;Acc:MGI:1095734]	protein_coding	ENSMUST00000031331,ENSMUST00000121127,ENSMUST00000130183,ENSMUST00000149329,ENSMUST00000152097,ENSMUST00000153260
ENSMUSG00000086841	0.749724	0.0142035	2410006H16Rik	RIKEN cDNA 2410006H16 gene [Source:MGI Symbol;Acc:MGI:1916471]	processed_transcript	ENSMUST00000131787
ENSMUSG00000005413	0.748418	0.0437883	Hmox1	heme oxygenase (decycling) 1 [Source:MGI Symbol;Acc:MGI:96163]	protein_coding	ENSMUST00000005548,ENSMUST00000159631,ENSMUST00000160341
ENSMUSG00000086320	0.744197	0.0241736	Gm12840	predicted gene 12840 [Source:MGI Symbol;Acc:MGI:3650917]	lincRNA	ENSMUST00000156081
ENSMUSG00000056938	0.742837	0.0393896	Acbd4	acyl-Coenzyme A binding domain containing 4 [Source:MGI Symbol;Acc:MGI:1914381]	protein_coding	ENSMUST00000024492,ENSMUST00000092559,ENSMUST00000107040,ENSMUST00000124965,ENSMUST00000129870,ENSMUST00000130749,ENSMUST00000134884,ENSMUST00000139374,ENSMUST00000140372,ENSMUST00000142630,ENSMUST00000146176,ENSMUST00000147701,ENSMUST00000150780,ENSMUST00000152971,ENSMUST00000161013,ENSMUST00000162338
ENSMUSG00000027698	0.736029	0.0393896	Nceh1	neutral cholesterol ester hydrolase 1 [Source:MGI Symbol;Acc:MGI:2443191]	protein_coding	ENSMUST00000046515,ENSMUST00000091284,ENSMUST00000129412,ENSMUST00000138947,ENSMUST00000140872
ENSMUSG00000044788	0.722425	0.0409117	Fads6	fatty acid desaturase domain family, member 6 [Source:MGI Symbol;Acc:MGI:3039592]	protein_coding	ENSMUST00000056153,ENSMUST00000141006
ENSMUSG00000020572	0.721732	0.037297	Nampt	nicotinamide phosphoribosyltransferase [Source:MGI Symbol;Acc:MGI:1929865]	protein_coding	ENSMUST00000020886
ENSMUSG00000055313	0.71984	0.0409117	Pgbd1	piggyBac transposable element derived 1 [Source:MGI Symbol;Acc:MGI:2441675]	protein_coding	ENSMUST00000099719,ENSMUST00000122872,ENSMUST00000145494,ENSMUST00000148071,ENSMUST00000151743
ENSMUSG00000042828	0.715186	0.0409117	Trim72	tripartite motif-containing 72 [Source:MGI Symbol;Acc:MGI:3612190]	protein_coding	ENSMUST00000081042,ENSMUST00000106248
ENSMUSG00000048249	0.713937	0.0114314	Crebrf	CREB3 regulatory factor [Source:MGI Symbol;Acc:MGI:1924378]	protein_coding	ENSMUST00000062519,ENSMUST00000132972,ENSMUST00000142539,ENSMUST00000144221,ENSMUST00000151681,ENSMUST00000176845
ENSMUSG00000020893	0.706732	0.00504698	Per1	period circadian clock 1 [Source:MGI Symbol;Acc:MGI:1098283]	protein_coding	ENSMUST00000021271,ENSMUST00000101004,ENSMUST00000102605,ENSMUST00000132462,ENSMUST00000142392,ENSMUST00000166748
ENSMUSG00000097347	0.705211	0.0393896	Gm17275	predicted gene, 17275 [Source:MGI Symbol;Acc:MGI:4936909]	lincRNA	ENSMUST00000181811
ENSMUSG00000051495	0.704593	0.00157278	Irf2bp2	interferon regulatory factor 2 binding protein 2 [Source:MGI Symbol;Acc:MGI:2443921]	protein_coding	ENSMUST00000054960
ENSMUSG00000039167	0.698576	0.0356263	Eltd1	EGF, latrophilin seven transmembrane domain containing 1 [Source:MGI Symbol;Acc:MGI:2655562]	protein_coding	ENSMUST00000046977,ENSMUST00000129283,ENSMUST00000141038,ENSMUST00000155652
ENSMUSG00000097815	0.682951	0.0273515	Gm26809	predicted gene, 26809 [Source:MGI Symbol;Acc:MGI:5477303]	lincRNA	ENSMUST00000180863
ENSMUSG00000101970	0.682233	0.0158173			processed_transcript	ENSMUST00000183916,ENSMUST00000184554,ENSMUST00000184655,ENSMUST00000184855,ENSMUST00000187421,ENSMUST00000189960,ENSMUST00000190028
ENSMUSG00000024381	0.679901	0.0240036	Bin1	bridging integrator 1 [Source:MGI Symbol;Acc:MGI:108092]	protein_coding	ENSMUST00000025239,ENSMUST00000091967
ENSMUSG00000028525	0.674508	0.00349314	Pde4b	phosphodiesterase 4B, cAMP specific [Source:MGI Symbol;Acc:MGI:99557]	protein_coding	ENSMUST00000030251,ENSMUST00000097949,ENSMUST00000097950,ENSMUST00000106901,ENSMUST00000106904,ENSMUST00000106907,ENSMUST00000106908,ENSMUST00000106911,ENSMUST00000133632,ENSMUST00000172616,ENSMUST00000172845,ENSMUST00000173119,ENSMUST00000174186
ENSMUSG00000056501	0.67068	0.0224706	Cebpb	CCAAT/enhancer binding protein (C/EBP), beta [Source:MGI Symbol;Acc:MGI:88373]	protein_coding	ENSMUST00000070642
ENSMUSG00000085105	0.669513	0.0477184	Gm12758	predicted gene 12758 [Source:MGI Symbol;Acc:MGI:3702543]	processed_transcript	ENSMUST00000127010
ENSMUSG00000056313	0.653369	0.0248966	1810011O10Rik	RIKEN cDNA 1810011O10 gene [Source:MGI Symbol;Acc:MGI:1916318]	protein_coding	ENSMUST00000052622
ENSMUSG00000085385	0.652491	0.0180784	9430008C03Rik	RIKEN cDNA 9430008C03 gene [Source:MGI Symbol;Acc:MGI:1915358]	processed_transcript	ENSMUST00000133449,ENSMUST00000138592,ENSMUST00000141809,ENSMUST00000149667,ENSMUST00000151331,ENSMUST00000152125,ENSMUST00000154030,ENSMUST00000154242,ENSMUST00000186993
ENSMUSG00000032633	0.648033	0.0248966	Flcn	folliculin [Source:MGI Symbol;Acc:MGI:2442184]	protein_coding	ENSMUST00000047706,ENSMUST00000091246,ENSMUST00000102697,ENSMUST00000133647,ENSMUST00000148151,ENSMUST00000151453
ENSMUSG00000005718	0.639415	0.0409117	Tfap4	transcription factor AP4 [Source:MGI Symbol;Acc:MGI:103239]	protein_coding	ENSMUST00000005862
ENSMUSG00000024168	0.626648	0.0248966	Tmem204	transmembrane protein 204 [Source:MGI Symbol;Acc:MGI:3039635]	protein_coding	ENSMUST00000024984,ENSMUST00000153745
ENSMUSG00000054737	0.618793	0.0467829	Zfp182	zinc finger protein 182 [Source:MGI Symbol;Acc:MGI:2442220]	protein_coding	ENSMUST00000040628,ENSMUST00000115333,ENSMUST00000115334,ENSMUST00000133186,ENSMUST00000138123
ENSMUSG00000035828	0.617071	0.0314849	Pim3	proviral integration site 3 [Source:MGI Symbol;Acc:MGI:1355297]	protein_coding	ENSMUST00000042818
ENSMUSG00000096210	0.611293	0.0240036	H1f0	H1 histone family, member 0 [Source:MGI Symbol;Acc:MGI:95893]	protein_coding	ENSMUST00000180086
ENSMUSG00000034640	0.602147	0.0188769	Tiparp	TCDD-inducible poly(ADP-ribose) polymerase [Source:MGI Symbol;Acc:MGI:2159210]	protein_coding	ENSMUST00000047906,ENSMUST00000130705,ENSMUST00000154094
ENSMUSG00000023088	0.599248	0.0437883	Abcc1	ATP-binding cassette, sub-family C (CFTR/MRP), member 1 [Source:MGI Symbol;Acc:MGI:102676]	protein_coding	ENSMUST00000100167,ENSMUST00000130671,ENSMUST00000133454,ENSMUST00000134776,ENSMUST00000134960,ENSMUST00000144074,ENSMUST00000144676,ENSMUST00000146032,ENSMUST00000147759,ENSMUST00000154748,ENSMUST00000156089
ENSMUSG00000074643	0.590321	0.0409117	Cpne1	copine I [Source:MGI Symbol;Acc:MGI:2386621]	protein_coding	ENSMUST00000079312,ENSMUST00000109607,ENSMUST00000109608,ENSMUST00000126513,ENSMUST00000133921,ENSMUST00000136296,ENSMUST00000140109,ENSMUST00000142960,ENSMUST00000142975,ENSMUST00000147627,ENSMUST00000147956,ENSMUST00000153634,ENSMUST00000154889,ENSMUST00000183353,ENSMUST00000183733,ENSMUST00000184152,ENSMUST00000184265,ENSMUST00000184933
ENSMUSG00000029135	0.58855	0.0114314	Fosl2	fos-like antigen 2 [Source:MGI Symbol;Acc:MGI:102858]	protein_coding	ENSMUST00000031017
ENSMUSG00000047153	0.587573	0.0466839	Khnyn	KH and NYN domain containing [Source:MGI Symbol;Acc:MGI:2451333]	protein_coding	ENSMUST00000022831
ENSMUSG00000051790	0.581934	0.044049	Nlgn2	neuroligin 2 [Source:MGI Symbol;Acc:MGI:2681835]	protein_coding	ENSMUST00000056484,ENSMUST00000108634,ENSMUST00000139893,ENSMUST00000140477
ENSMUSG00000032688	0.57752	0.0294171	Malt1	mucosa associated lymphoid tissue lymphoma translocation gene 1 [Source:MGI Symbol;Acc:MGI:2445027]	protein_coding	ENSMUST00000049248
ENSMUSG00000027533	0.577363	0.0466839	Fabp5	fatty acid binding protein 5, epidermal [Source:MGI Symbol;Acc:MGI:101790]	protein_coding	ENSMUST00000029046,ENSMUST00000123744
ENSMUSG00000016458	0.568782	0.0379881	Wt1	Wilms tumor 1 homolog [Source:MGI Symbol;Acc:MGI:98968]	protein_coding	ENSMUST00000111098,ENSMUST00000111099,ENSMUST00000133470,ENSMUST00000139585,ENSMUST00000143043,ENSMUST00000145107,ENSMUST00000146842,ENSMUST00000153944
ENSMUSG00000026429	0.560794	0.0374323	Ube2t	ubiquitin-conjugating enzyme E2T (putative) [Source:MGI Symbol;Acc:MGI:1914446]	protein_coding	ENSMUST00000027687,ENSMUST00000139617,ENSMUST00000185369,ENSMUST00000188177
ENSMUSG00000032114	0.556591	0.0466839	Slc37a4	solute carrier family 37 (glucose-6-phosphate transporter), member 4 [Source:MGI Symbol;Acc:MGI:1316650]	protein_coding	ENSMUST00000165839
ENSMUSG00000023942	0.551056	0.0180784	Slc29a1	solute carrier family 29 (nucleoside transporters), member 1 [Source:MGI Symbol;Acc:MGI:1927073]	protein_coding	ENSMUST00000051574,ENSMUST00000064889,ENSMUST00000097317,ENSMUST00000163492,ENSMUST00000163905,ENSMUST00000164217,ENSMUST00000164618,ENSMUST00000164769,ENSMUST00000166119,ENSMUST00000166633,ENSMUST00000167195,ENSMUST00000167332,ENSMUST00000167692,ENSMUST00000167748,ENSMUST00000167863,ENSMUST00000168274,ENSMUST00000169729,ENSMUST00000170113,ENSMUST00000170425,ENSMUST00000170488,ENSMUST00000171081,…
ENSMUSG00000047867	0.548746	0.0312785	Gimap6	GTPase, IMAP family member 6 [Source:MGI Symbol;Acc:MGI:1918876]	protein_coding	ENSMUST00000053661,ENSMUST00000119315,ENSMUST00000126422,ENSMUST00000132725
ENSMUSG00000002325	0.540437	0.0412008	Irf9	interferon regulatory factor 9 [Source:MGI Symbol;Acc:MGI:107587]	protein_coding	ENSMUST00000126269,ENSMUST00000130697,ENSMUST00000134863,ENSMUST00000136109,ENSMUST00000138037,ENSMUST00000145680
ENSMUSG00000025880	0.537461	0.0466395	Smad7	SMAD family member 7 [Source:MGI Symbol;Acc:MGI:1100518]	protein_coding	ENSMUST00000026999,ENSMUST00000168918,ENSMUST00000172718,ENSMUST00000174411,ENSMUST00000174843
ENSMUSG00000031609	0.537114	0.044049	Sap30	sin3 associated polypeptide [Source:MGI Symbol;Acc:MGI:1929129]	protein_coding	ENSMUST00000034022
ENSMUSG00000024042	0.53538	0.0221191	Sik1	salt inducible kinase 1 [Source:MGI Symbol;Acc:MGI:104754]	protein_coding	ENSMUST00000024839
ENSMUSG00000056962	0.530513	0.0289499	Jmjd6	jumonji domain containing 6 [Source:MGI Symbol;Acc:MGI:1858910]	protein_coding	ENSMUST00000047616,ENSMUST00000124831,ENSMUST00000130120,ENSMUST00000140349,ENSMUST00000140513,ENSMUST00000141735,ENSMUST00000142495
ENSMUSG00000020027	0.529936	0.0158173	Socs2	suppressor of cytokine signaling 2 [Source:MGI Symbol;Acc:MGI:1201787]	protein_coding	ENSMUST00000020215,ENSMUST00000119917,ENSMUST00000128363,ENSMUST00000128854,ENSMUST00000129942,ENSMUST00000130784,ENSMUST00000134918,ENSMUST00000135822,ENSMUST00000139210,ENSMUST00000145847,ENSMUST00000150432,ENSMUST00000155148,ENSMUST00000170690,ENSMUST00000172070
ENSMUSG00000011179	0.525588	0.0255881	Odc1	ornithine decarboxylase, structural 1 [Source:MGI Symbol;Acc:MGI:97402]	protein_coding	ENSMUST00000171737
ENSMUSG00000001750	0.510754	0.0393896	Tcirg1	T cell, immune regulator 1, ATPase, H+ transporting, lysosomal V0 protein A3 [Source:MGI Symbol;Acc:MGI:1350931]	protein_coding	ENSMUST00000001801,ENSMUST00000122885,ENSMUST00000125792,ENSMUST00000126070,ENSMUST00000126643,ENSMUST00000127308,ENSMUST00000131327,ENSMUST00000132164,ENSMUST00000134698,ENSMUST00000135070,ENSMUST00000145791,ENSMUST00000159824,ENSMUST00000162688
ENSMUSG00000098178	0.502284	0.0409117	Yam1	YY1 associated myogenesis RNA 1 [Source:MGI Symbol;Acc:MGI:5504039]	lincRNA	ENSMUST00000182010
ENSMUSG00000027318	0.498698	0.0437883	Adam33	a disintegrin and metallopeptidase domain 33 [Source:MGI Symbol;Acc:MGI:1341813]	protein_coding	ENSMUST00000052104,ENSMUST00000110232,ENSMUST00000124481,ENSMUST00000127343,ENSMUST00000128828,ENSMUST00000132071,ENSMUST00000132436,ENSMUST00000134742,ENSMUST00000135149,ENSMUST00000147333,ENSMUST00000149625,ENSMUST00000183552,ENSMUST00000184921
ENSMUSG00000041695	0.496378	0.0399247	Kcnj2	potassium inwardly-rectifying channel, subfamily J, member 2 [Source:MGI Symbol;Acc:MGI:104744]	protein_coding	ENSMUST00000042970
ENSMUSG00000046794	0.495437	0.0343291	Ppp1r3b	protein phosphatase 1, regulatory (inhibitor) subunit 3B [Source:MGI Symbol;Acc:MGI:2177268]	protein_coding	ENSMUST00000070481
ENSMUSG00000035992	0.495367	0.0404435	Fnip1	folliculin interacting protein 1 [Source:MGI Symbol;Acc:MGI:2444668]	protein_coding	ENSMUST00000046835,ENSMUST00000143650
ENSMUSG00000036528	0.493737	0.0374323	Ppfibp2	PTPRF interacting protein, binding protein 2 (liprin beta 2) [Source:MGI Symbol;Acc:MGI:894649]	protein_coding	ENSMUST00000040056,ENSMUST00000098134
ENSMUSG00000004040	0.49183	0.00988627	Stat3	signal transducer and activator of transcription 3 [Source:MGI Symbol;Acc:MGI:103038]	protein_coding	ENSMUST00000092671,ENSMUST00000103114,ENSMUST00000127638,ENSMUST00000130686,ENSMUST00000137093,ENSMUST00000137367,ENSMUST00000138438,ENSMUST00000146971,ENSMUST00000151544,ENSMUST00000152601,ENSMUST00000152623,ENSMUST00000154170,ENSMUST00000155972,ENSMUST00000156645
ENSMUSG00000019055	0.491695	0.0472094	Plod1	procollagen-lysine, 2-oxoglutarate 5-dioxygenase 1 [Source:MGI Symbol;Acc:MGI:99907]	protein_coding	ENSMUST00000019199,ENSMUST00000105712,ENSMUST00000124041,ENSMUST00000124292,ENSMUST00000132075,ENSMUST00000149129
ENSMUSG00000032374	0.481638	0.0467829	Plod2	procollagen lysine, 2-oxoglutarate 5-dioxygenase 2 [Source:MGI Symbol;Acc:MGI:1347007]	protein_coding	ENSMUST00000070522,ENSMUST00000160142,ENSMUST00000160359,ENSMUST00000161906,ENSMUST00000190075
ENSMUSG00000032578	0.473983	0.0391049	Cish	cytokine inducible SH2-containing protein [Source:MGI Symbol;Acc:MGI:103159]	protein_coding	ENSMUST00000085102,ENSMUST00000165664,ENSMUST00000167072,ENSMUST00000168260,ENSMUST00000171568
ENSMUSG00000020744	0.473097	0.044098	Slc25a19	solute carrier family 25 (mitochondrial thiamine pyrophosphate carrier), member 19 [Source:MGI Symbol;Acc:MGI:1914533]	protein_coding	ENSMUST00000021089,ENSMUST00000106503,ENSMUST00000129194,ENSMUST00000134171,ENSMUST00000135552,ENSMUST00000140539,ENSMUST00000141614,ENSMUST00000144083,ENSMUST00000150898,ENSMUST00000154623,ENSMUST00000155709,ENSMUST00000178003
ENSMUSG00000038412	0.472788	0.0376374	Higd1a	HIG1 domain family, member 1A [Source:MGI Symbol;Acc:MGI:1930666]	protein_coding	ENSMUST00000060251
ENSMUSG00000047767	0.468109	0.0466839	Atg16l2	autophagy related 16-like 2 (S. cerevisiae) [Source:MGI Symbol;Acc:MGI:1920933]	protein_coding	ENSMUST00000120267,ENSMUST00000122116,ENSMUST00000123835,ENSMUST00000123970,ENSMUST00000124617,ENSMUST00000131988,ENSMUST00000134531,ENSMUST00000139609,ENSMUST00000140059,ENSMUST00000140553,ENSMUST00000143630,ENSMUST00000146445,ENSMUST00000151297,ENSMUST00000153327
ENSMUSG00000020523	0.464891	0.0264543	Fam114a2	family with sequence similarity 114, member A2 [Source:MGI Symbol;Acc:MGI:1917629]	protein_coding	ENSMUST00000020831,ENSMUST00000108850,ENSMUST00000129596,ENSMUST00000130596
ENSMUSG00000022617	0.450077	0.0467829	Chkb	choline kinase beta [Source:MGI Symbol;Acc:MGI:1328313]	protein_coding	ENSMUST00000023289,ENSMUST00000052315,ENSMUST00000112664,ENSMUST00000115278,ENSMUST00000165623,ENSMUST00000166267,ENSMUST00000170334,ENSMUST00000170460,ENSMUST00000171140,ENSMUST00000171666
ENSMUSG00000025402	0.449965	0.0356263	Nab2	Ngfi-A binding protein 2 [Source:MGI Symbol;Acc:MGI:107563]	protein_coding	ENSMUST00000026469,ENSMUST00000099157,ENSMUST00000128780,ENSMUST00000129252
ENSMUSG00000021431	0.446354	0.0427614	Snrnp48	small nuclear ribonucleoprotein 48 (U11/U12) [Source:MGI Symbol;Acc:MGI:1915047]	protein_coding	ENSMUST00000091641,ENSMUST00000178564
ENSMUSG00000095865	0.445122	0.0224706	Gm13237	predicted gene 13237 [Source:MGI Symbol;Acc:MGI:3649924]	pseudogene	ENSMUST00000122151
ENSMUSG00000022203	0.436275	0.037297	Efs	embryonal Fyn-associated substrate [Source:MGI Symbol;Acc:MGI:105311]	protein_coding	ENSMUST00000022813
ENSMUSG00000086290	0.436153	0.0437883	Snhg12	small nucleolar RNA host gene 12 [Source:MGI Symbol;Acc:MGI:1916721]	lincRNA	ENSMUST00000126380,ENSMUST00000128000,ENSMUST00000128131,ENSMUST00000137343,ENSMUST00000144705,ENSMUST00000153474,ENSMUST00000182826
ENSMUSG00000074578	0.435657	0.0364321	1500012F01Rik	RIKEN cDNA 1500012F01 gene [Source:MGI Symbol;Acc:MGI:1916199]	protein_coding	ENSMUST00000125674,ENSMUST00000125841,ENSMUST00000136378,ENSMUST00000143587,ENSMUST00000145859,ENSMUST00000189909
ENSMUSG00000043004	0.430761	0.0466839	Gng2	guanine nucleotide binding protein (G protein), gamma 2 [Source:MGI Symbol;Acc:MGI:102705]	protein_coding	ENSMUST00000055100,ENSMUST00000159028,ENSMUST00000159073,ENSMUST00000160013,ENSMUST00000161247,ENSMUST00000162425
ENSMUSG00000048271	0.430184	0.0260037	Rbm33	RNA binding motif protein 33 [Source:MGI Symbol;Acc:MGI:1919670]	protein_coding	ENSMUST00000030920,ENSMUST00000059644,ENSMUST00000090355,ENSMUST00000114884,ENSMUST00000133313,ENSMUST00000144967
ENSMUSG00000021273	0.420647	0.0393896	Fdft1	farnesyl diphosphate farnesyl transferase 1 [Source:MGI Symbol;Acc:MGI:102706]	protein_coding	ENSMUST00000054963
ENSMUSG00000030161	0.413726	0.0224706	Gabarapl1	gamma-aminobutyric acid (GABA) A receptor-associated protein-like 1 [Source:MGI Symbol;Acc:MGI:1914980]	protein_coding	ENSMUST00000032264
ENSMUSG00000031880	0.409414	0.0437883	Rrad	Ras-related associated with diabetes [Source:MGI Symbol;Acc:MGI:1930943]	protein_coding	ENSMUST00000034351
ENSMUSG00000035293	0.405187	0.0255156	G2e3	G2/M-phase specific E3 ubiquitin ligase [Source:MGI Symbol;Acc:MGI:2444298]	protein_coding	ENSMUST00000054308,ENSMUST00000119211,ENSMUST00000121521,ENSMUST00000144767,ENSMUST00000152236
ENSMUSG00000033460	0.398493	0.0466377	Armcx1	armadillo repeat containing, X-linked 1 [Source:MGI Symbol;Acc:MGI:1925498]	protein_coding	ENSMUST00000035748,ENSMUST00000051256,ENSMUST00000113197,ENSMUST00000113198,ENSMUST00000113199,ENSMUST00000113201,ENSMUST00000125684,ENSMUST00000129697,ENSMUST00000137173,ENSMUST00000138421
ENSMUSG00000037509	0.392034	0.044049	Arhgef4	Rho guanine nucleotide exchange factor (GEF) 4 [Source:MGI Symbol;Acc:MGI:2442507]	protein_coding	ENSMUST00000047664,ENSMUST00000159021,ENSMUST00000159059,ENSMUST00000159747,ENSMUST00000160855,ENSMUST00000162599,ENSMUST00000162760
ENSMUSG00000031375	0.390792	0.0437883	Bgn	biglycan [Source:MGI Symbol;Acc:MGI:88158]	protein_coding	ENSMUST00000033741,ENSMUST00000130873,ENSMUST00000133394,ENSMUST00000140803,ENSMUST00000141945,ENSMUST00000155231,ENSMUST00000169489,ENSMUST00000183174
ENSMUSG00000031523	0.389583	0.0388199	Dlc1	deleted in liver cancer 1 [Source:MGI Symbol;Acc:MGI:1354949]	protein_coding	ENSMUST00000033923,ENSMUST00000036104,ENSMUST00000098826,ENSMUST00000145245,ENSMUST00000156312,ENSMUST00000163663,ENSMUST00000178717,ENSMUST00000179501,ENSMUST00000179652
ENSMUSG00000020224	0.38691	0.0393896	Llph	LLP homolog, long-term synaptic facilitation (Aplysia) [Source:MGI Symbol;Acc:MGI:1913475]	protein_coding	ENSMUST00000020444,ENSMUST00000130198
ENSMUSG00000010095	0.385029	0.044049	Slc3a2	solute carrier family 3 (activators of dibasic and neutral amino acid transport), member 2 [Source:MGI Symbol;Acc:MGI:96955]	protein_coding	ENSMUST00000010239,ENSMUST00000170157
ENSMUSG00000074794	0.380885	0.0193309	Arrdc3	arrestin domain containing 3 [Source:MGI Symbol;Acc:MGI:2145242]	protein_coding	ENSMUST00000099356,ENSMUST00000159090,ENSMUST00000159690,ENSMUST00000159856,ENSMUST00000161441,ENSMUST00000162904
ENSMUSG00000006920	0.380197	0.0467829	Ezh1	enhancer of zeste homolog 1 (Drosophila) [Source:MGI Symbol;Acc:MGI:1097695]	protein_coding	ENSMUST00000100417,ENSMUST00000107284,ENSMUST00000107285,ENSMUST00000128974,ENSMUST00000134622,ENSMUST00000138835,ENSMUST00000146884,ENSMUST00000151291,ENSMUST00000154211
ENSMUSG00000031024	0.368932	0.0377685	St5	suppression of tumorigenicity 5 [Source:MGI Symbol;Acc:MGI:108517]	protein_coding	ENSMUST00000077909,ENSMUST00000079282,ENSMUST00000084738,ENSMUST00000168005
ENSMUSG00000024378	0.36733	0.044049	Stard4	StAR-related lipid transfer (START) domain containing 4 [Source:MGI Symbol;Acc:MGI:2156764]	protein_coding	ENSMUST00000025236,ENSMUST00000118990,ENSMUST00000119991,ENSMUST00000141617
ENSMUSG00000024191	0.362556	0.0469635	Bnip1	BCL2/adenovirus E1B interacting protein 1 [Source:MGI Symbol;Acc:MGI:109328]	protein_coding	ENSMUST00000015725,ENSMUST00000126505,ENSMUST00000128461,ENSMUST00000131362,ENSMUST00000134344,ENSMUST00000135824,ENSMUST00000135899,ENSMUST00000137989,ENSMUST00000147516
ENSMUSG00000031585	0.357324	0.0425875	Gtf2e2	general transcription factor II E, polypeptide 2 (beta subunit) [Source:MGI Symbol;Acc:MGI:1915403]	protein_coding	ENSMUST00000167264,ENSMUST00000170705,ENSMUST00000171010,ENSMUST00000186200,ENSMUST00000187392,ENSMUST00000190639,ENSMUST00000190675
ENSMUSG00000027439	0.330381	0.0472395	Gzf1	GDNF-inducible zinc finger protein 1 [Source:MGI Symbol;Acc:MGI:1921783]	protein_coding	ENSMUST00000028928,ENSMUST00000131292,ENSMUST00000151362
ENSMUSG00000049866	0.327021	0.0494539	Arl4c	ADP-ribosylation factor-like 4C [Source:MGI Symbol;Acc:MGI:2445172]	protein_coding	ENSMUST00000051236,ENSMUST00000159814,ENSMUST00000187810
ENSMUSG00000099083	0.324126	0.044049	Atf7	activating transcription factor 7 [Source:MGI Symbol;Acc:MGI:2443472]	protein_coding	ENSMUST00000096143,ENSMUST00000108828,ENSMUST00000169033,ENSMUST00000183452,ENSMUST00000183727,ENSMUST00000183765,ENSMUST00000183786,ENSMUST00000184077,ENSMUST00000184485,ENSMUST00000184616,ENSMUST00000184906,ENSMUST00000184918,ENSMUST00000185070
ENSMUSG00000046402	0.317465	0.0393896	Rbp1	retinol binding protein 1, cellular [Source:MGI Symbol;Acc:MGI:97876]	protein_coding	ENSMUST00000052068
ENSMUSG00000021477	0.309909	0.0377685	Ctsl	cathepsin L [Source:MGI Symbol;Acc:MGI:88564]	protein_coding	ENSMUST00000021933
ENSMUSG00000014329	0.304313	0.0379881	Bicc1	bicaudal C homolog 1 (Drosophila) [Source:MGI Symbol;Acc:MGI:1933388]	protein_coding	ENSMUST00000014473,ENSMUST00000131445,ENSMUST00000143791,ENSMUST00000144740
ENSMUSG00000058600	0.301337	0.0393896	Rpl30	ribosomal protein L30 [Source:MGI Symbol;Acc:MGI:98037]	protein_coding	ENSMUST00000009039,ENSMUST00000079735,ENSMUST00000135417,ENSMUST00000136653,ENSMUST00000140527,ENSMUST00000142643
ENSMUSG00000029718	0.299543	0.0374323	Pcolce	procollagen C-endopeptidase enhancer protein [Source:MGI Symbol;Acc:MGI:105099]	protein_coding	ENSMUST00000031731,ENSMUST00000054564,ENSMUST00000124693,ENSMUST00000128755,ENSMUST00000131703,ENSMUST00000136649,ENSMUST00000137210,ENSMUST00000142675,ENSMUST00000146589,ENSMUST00000148662,ENSMUST00000155251
ENSMUSG00000016559	0.279892	0.0437883	H3f3b	H3 histone, family 3B [Source:MGI Symbol;Acc:MGI:1101768]	protein_coding	ENSMUST00000016703,ENSMUST00000106454,ENSMUST00000139378,ENSMUST00000139623
ENSMUSG00000071415	0.263625	0.0467829	Rpl23	ribosomal protein L23 [Source:MGI Symbol;Acc:MGI:1929455]	protein_coding	ENSMUST00000103146,ENSMUST00000128801,ENSMUST00000150955,ENSMUST00000151118,ENSMUST00000151965
ENSMUSG00000053841	-0.254178	0.0467829	Txlna	taxilin alpha [Source:MGI Symbol;Acc:MGI:105968]	protein_coding	ENSMUST00000046425,ENSMUST00000084264,ENSMUST00000130017,ENSMUST00000132217,ENSMUST00000133803,ENSMUST00000142577,ENSMUST00000154105
ENSMUSG00000030980	-0.256823	0.043817	Knop1	lysine rich nucleolar protein 1 [Source:MGI Symbol;Acc:MGI:1913606]	protein_coding	ENSMUST00000033277,ENSMUST00000063607,ENSMUST00000106549,ENSMUST00000106550,ENSMUST00000116280,ENSMUST00000126792,ENSMUST00000152309
ENSMUSG00000022016	-0.275218	0.0409117	Akap11	A kinase (PRKA) anchor protein 11 [Source:MGI Symbol;Acc:MGI:2684060]	protein_coding	ENSMUST00000022593,ENSMUST00000123853
ENSMUSG00000028465	-0.275636	0.035912	Tln1	talin 1 [Source:MGI Symbol;Acc:MGI:1099832]	protein_coding	ENSMUST00000030187,ENSMUST00000123985,ENSMUST00000125509,ENSMUST00000126078,ENSMUST00000127262,ENSMUST00000130353,ENSMUST00000130670,ENSMUST00000134623
ENSMUSG00000079481	-0.283325	0.043817	Nhsl2	NHS-like 2 [Source:MGI Symbol;Acc:MGI:3645090]	protein_coding	ENSMUST00000101339,ENSMUST00000113628,ENSMUST00000124279,ENSMUST00000125115,ENSMUST00000129185,ENSMUST00000144397,ENSMUST00000144753,ENSMUST00000148044,ENSMUST00000155477
ENSMUSG00000059890	-0.284207	0.0437883	Ube4a	ubiquitination factor E4A [Source:MGI Symbol;Acc:MGI:2154580]	protein_coding	ENSMUST00000117506,ENSMUST00000117549,ENSMUST00000125642,ENSMUST00000138559,ENSMUST00000145657,ENSMUST00000154287,ENSMUST00000155400
ENSMUSG00000031386	-0.287203	0.02979	Hcfc1	host cell factor C1 [Source:MGI Symbol;Acc:MGI:105942]	protein_coding	ENSMUST00000033761,ENSMUST00000114372,ENSMUST00000128136,ENSMUST00000128325,ENSMUST00000131091,ENSMUST00000156204
ENSMUSG00000036450	-0.28808	0.0467829	Hif1an	hypoxia-inducible factor 1, alpha subunit inhibitor [Source:MGI Symbol;Acc:MGI:2442345]	protein_coding	ENSMUST00000040455,ENSMUST00000131032
ENSMUSG00000021978	-0.288264	0.0478738	Extl3	exostoses (multiple)-like 3 [Source:MGI Symbol;Acc:MGI:1860765]	protein_coding	ENSMUST00000022550
ENSMUSG00000032232	-0.288616	0.043817	Cgnl1	cingulin-like 1 [Source:MGI Symbol;Acc:MGI:1915428]	protein_coding	ENSMUST00000072899,ENSMUST00000121322,ENSMUST00000122065,ENSMUST00000136044,ENSMUST00000146567,ENSMUST00000152224
ENSMUSG00000005299	-0.292301	0.0467829	Letm1	leucine zipper-EF-hand containing transmembrane protein 1 [Source:MGI Symbol;Acc:MGI:1932557]	protein_coding	ENSMUST00000005431,ENSMUST00000144071,ENSMUST00000148451,ENSMUST00000149886
ENSMUSG00000032481	-0.292556	0.0379881	Smarcc1	SWI/SNF related, matrix associated, actin dependent regulator of chromatin, subfamily c, member 1 [Source:MGI Symbol;Acc:MGI:1203524]	protein_coding	ENSMUST00000035057,ENSMUST00000088716,ENSMUST00000111966,ENSMUST00000111968,ENSMUST00000111969
ENSMUSG00000039047	-0.292601	0.0474896	Pigk	phosphatidylinositol glycan anchor biosynthesis, class K [Source:MGI Symbol;Acc:MGI:1913863]	protein_coding	ENSMUST00000045029,ENSMUST00000051510,ENSMUST00000159045,ENSMUST00000159899,ENSMUST00000160651,ENSMUST00000161596,ENSMUST00000162642,ENSMUST00000162835
ENSMUSG00000039477	-0.293467	0.0437883	Tnrc18	trinucleotide repeat containing 18 [Source:MGI Symbol;Acc:MGI:3648294]	protein_coding	ENSMUST00000036253,ENSMUST00000151477,ENSMUST00000152247,ENSMUST00000155461
ENSMUSG00000050288	-0.296675	0.0437883	Fzd2	frizzled homolog 2 (Drosophila) [Source:MGI Symbol;Acc:MGI:1888513]	protein_coding	ENSMUST00000057893
ENSMUSG00000031749	-0.297118	0.043817	St3gal2	ST3 beta-galactoside alpha-2,3-sialyltransferase 2 [Source:MGI Symbol;Acc:MGI:99427]	protein_coding	ENSMUST00000034197,ENSMUST00000117534,ENSMUST00000129639,ENSMUST00000138332,ENSMUST00000141464
ENSMUSG00000024360	-0.298209	0.0437883	Etf1	eukaryotic translation termination factor 1 [Source:MGI Symbol;Acc:MGI:2385071]	protein_coding	ENSMUST00000025218,ENSMUST00000180351
ENSMUSG00000026662	-0.300842	0.0437883	Sephs1	selenophosphate synthetase 1 [Source:MGI Symbol;Acc:MGI:1923580]	protein_coding	ENSMUST00000027973,ENSMUST00000115019,ENSMUST00000140045,ENSMUST00000144565
ENSMUSG00000006134	-0.30422	0.0437883	Crkl	v-crk sarcoma virus CT10 oncogene homolog (avian)-like [Source:MGI Symbol;Acc:MGI:104686]	protein_coding	ENSMUST00000006293
ENSMUSG00000022043	-0.304731	0.037297	Trim35	tripartite motif-containing 35 [Source:MGI Symbol;Acc:MGI:1914104]	protein_coding	ENSMUST00000022623,ENSMUST00000121006
ENSMUSG00000024571	-0.305953	0.0393896	Gm16286	predicted gene 16286 [Source:MGI Symbol;Acc:MGI:3833940]	protein_coding	ENSMUST00000025463,ENSMUST00000125127,ENSMUST00000125352,ENSMUST00000126177,ENSMUST00000127234,ENSMUST00000145116,ENSMUST00000153363,ENSMUST00000155879,ENSMUST00000156400
ENSMUSG00000050029	-0.307938	0.0481426	Rap2c	RAP2C, member of RAS oncogene family [Source:MGI Symbol;Acc:MGI:1919315]	protein_coding	ENSMUST00000053593
ENSMUSG00000072720	-0.30892	0.0393896	Myo18b	myosin XVIIIb [Source:MGI Symbol;Acc:MGI:1921626]	protein_coding	ENSMUST00000086617,ENSMUST00000182189,ENSMUST00000183029,ENSMUST00000183273
ENSMUSG00000007613	-0.309272	0.0487388	Tgfbr1	transforming growth factor, beta receptor I [Source:MGI Symbol;Acc:MGI:98728]	protein_coding	ENSMUST00000007757,ENSMUST00000044234,ENSMUST00000107725,ENSMUST00000123962,ENSMUST00000126171
ENSMUSG00000003948	-0.312011	0.0335443	Mmd	monocyte to macrophage differentiation-associated [Source:MGI Symbol;Acc:MGI:1914718]	protein_coding	ENSMUST00000004050,ENSMUST00000107887,ENSMUST00000124877,ENSMUST00000134929,ENSMUST00000153734
ENSMUSG00000030319	-0.317642	0.0265734	Cand2	cullin-associated and neddylation-dissociated 2 (putative) [Source:MGI Symbol;Acc:MGI:1914338]	protein_coding	ENSMUST00000075995
ENSMUSG00000006262	-0.320474	0.0459391	Mob1b	MOB kinase activator 1B [Source:MGI Symbol;Acc:MGI:1915723]	protein_coding	ENSMUST00000006424,ENSMUST00000113229,ENSMUST00000125171,ENSMUST00000155298
ENSMUSG00000037111	-0.321004	0.0474701	Setd7	SET domain containing (lysine methyltransferase) 7 [Source:MGI Symbol;Acc:MGI:1920501]	protein_coding	ENSMUST00000037141,ENSMUST00000161755
ENSMUSG00000042364	-0.330175	0.0388795	Snx18	sorting nexin 18 [Source:MGI Symbol;Acc:MGI:2137642]	protein_coding	ENSMUST00000109241
ENSMUSG00000015944	-0.331617	0.0467509	Gatsl2	GATS protein-like 2 [Source:MGI Symbol;Acc:MGI:1933384]	protein_coding	ENSMUST00000016088,ENSMUST00000140240
ENSMUSG00000043019	-0.333923	0.0425875	Edem3	ER degradation enhancer, mannosidase alpha-like 3 [Source:MGI Symbol;Acc:MGI:1914217]	protein_coding	ENSMUST00000059498,ENSMUST00000187951,ENSMUST00000188145,ENSMUST00000191070
ENSMUSG00000089824	-0.33535	0.0467829	Rbm12	RNA binding motif protein 12 [Source:MGI Symbol;Acc:MGI:1922960]	protein_coding	ENSMUST00000059647,ENSMUST00000109604,ENSMUST00000128499,ENSMUST00000131377,ENSMUST00000138068
ENSMUSG00000000184	-0.335995	0.0437883	Ccnd2	cyclin D2 [Source:MGI Symbol;Acc:MGI:88314]	protein_coding	ENSMUST00000000188
ENSMUSG00000070733	-0.337078	0.0466839	Fryl	furry homolog-like (Drosophila) [Source:MGI Symbol;Acc:MGI:1919563]	protein_coding	ENSMUST00000094700,ENSMUST00000101127,ENSMUST00000123446,ENSMUST00000143665,ENSMUST00000146953,ENSMUST00000148433,ENSMUST00000152631,ENSMUST00000153903,ENSMUST00000153923,ENSMUST00000156661,ENSMUST00000175890,ENSMUST00000176910
ENSMUSG00000039987	-0.339366	0.0471947	Phtf2	putative homeodomain transcription factor 2 [Source:MGI Symbol;Acc:MGI:1916020]	protein_coding	ENSMUST00000118174,ENSMUST00000124431,ENSMUST00000133784,ENSMUST00000139325,ENSMUST00000140147,ENSMUST00000153194,ENSMUST00000156044
ENSMUSG00000002741	-0.33996	0.0292193	Ykt6	YKT6 homolog (S. Cerevisiae) [Source:MGI Symbol;Acc:MGI:1927550]	protein_coding	ENSMUST00000002818,ENSMUST00000143834
ENSMUSG00000043733	-0.342257	0.0240036	Ptpn11	protein tyrosine phosphatase, non-receptor type 11 [Source:MGI Symbol;Acc:MGI:99511]	protein_coding	ENSMUST00000054547,ENSMUST00000100770,ENSMUST00000148407,ENSMUST00000148871
ENSMUSG00000026923	-0.343521	0.0260037	Notch1	notch 1 [Source:MGI Symbol;Acc:MGI:97363]	protein_coding	ENSMUST00000028288,ENSMUST00000123873,ENSMUST00000126872,ENSMUST00000129506,ENSMUST00000131393,ENSMUST00000132820,ENSMUST00000132941,ENSMUST00000138034,ENSMUST00000140082,ENSMUST00000147481,ENSMUST00000148948
ENSMUSG00000020250	-0.346101	0.0348194	Txnrd1	thioredoxin reductase 1 [Source:MGI Symbol;Acc:MGI:1354175]	protein_coding	ENSMUST00000020484
ENSMUSG00000051413	-0.348092	0.0274295	Plagl2	pleiomorphic adenoma gene-like 2 [Source:MGI Symbol;Acc:MGI:1933165]	protein_coding	ENSMUST00000056924,ENSMUST00000109795
ENSMUSG00000023075	-0.352491	0.0248966	Akirin1	akirin 1 [Source:MGI Symbol;Acc:MGI:1915300]	protein_coding	ENSMUST00000102636,ENSMUST00000142778,ENSMUST00000153472
ENSMUSG00000022995	-0.354082	0.02979	Enah	enabled homolog (Drosophila) [Source:MGI Symbol;Acc:MGI:108360]	protein_coding	ENSMUST00000078719,ENSMUST00000111024,ENSMUST00000111025,ENSMUST00000111030,ENSMUST00000177811
ENSMUSG00000030753	-0.359754	0.0437883	Prkrir	protein-kinase, interferon-inducible double stranded RNA dependent inhibitor, repressor of (P58 repressor) [Source:MGI Symbol;Acc:MGI:1920231]	protein_coding	ENSMUST00000033009,ENSMUST00000126356,ENSMUST00000146473,ENSMUST00000153566
ENSMUSG00000022451	-0.362222	0.0260037	Twf1	twinfilin, actin-binding protein, homolog 1 (Drosophila) [Source:MGI Symbol;Acc:MGI:1100520]	protein_coding	ENSMUST00000023087,ENSMUST00000127347,ENSMUST00000152590,ENSMUST00000155654
ENSMUSG00000070047	-0.366353	0.0437883	Fat1	FAT tumor suppressor homolog 1 (Drosophila) [Source:MGI Symbol;Acc:MGI:109168]	protein_coding	ENSMUST00000098796,ENSMUST00000186342,ENSMUST00000189017,ENSMUST00000189367,ENSMUST00000191428,ENSMUST00000191558
ENSMUSG00000074102	-0.366961	0.027704	Rbm15b	RNA binding motif protein 15B [Source:MGI Symbol;Acc:MGI:1923598]	protein_coding	ENSMUST00000055843,ENSMUST00000098424,ENSMUST00000185707
ENSMUSG00000049265	-0.369365	0.037297	Kcnk3	potassium channel, subfamily K, member 3 [Source:MGI Symbol;Acc:MGI:1100509]	protein_coding	ENSMUST00000066295
ENSMUSG00000038914	-0.36981	0.0239263	Dido1	death inducer-obliterator 1 [Source:MGI Symbol;Acc:MGI:1344352]	protein_coding	ENSMUST00000037764,ENSMUST00000087517,ENSMUST00000103054,ENSMUST00000103055,ENSMUST00000103056,ENSMUST00000103057,ENSMUST00000130986
ENSMUSG00000039826	-0.371639	0.0477184	Trub2	TruB pseudouridine (psi) synthase homolog 2 (E. coli) [Source:MGI Symbol;Acc:MGI:2442186]	protein_coding	ENSMUST00000048044,ENSMUST00000113803,ENSMUST00000113807,ENSMUST00000148120,ENSMUST00000156846,ENSMUST00000175644,ENSMUST00000176167,ENSMUST00000176312,ENSMUST00000177133,ENSMUST00000177467
ENSMUSG00000035666	-0.373113	0.041289	Gtf3c4	general transcription factor IIIC, polypeptide 4 [Source:MGI Symbol;Acc:MGI:2138937]	protein_coding	ENSMUST00000037117,ENSMUST00000124390,ENSMUST00000156468,ENSMUST00000171404
ENSMUSG00000072235	-0.373461	0.0437883	Tuba1a	tubulin, alpha 1A [Source:MGI Symbol;Acc:MGI:98869]	protein_coding	ENSMUST00000097014,ENSMUST00000134214,ENSMUST00000136329
ENSMUSG00000021109	-0.379689	0.0467829	Hif1a	hypoxia inducible factor 1, alpha subunit [Source:MGI Symbol;Acc:MGI:106918]	protein_coding	ENSMUST00000021530,ENSMUST00000110461,ENSMUST00000110464,ENSMUST00000149740,ENSMUST00000157041
ENSMUSG00000047749	-0.39131	0.0348194	Zc3hav1l	zinc finger CCCH-type, antiviral 1-like [Source:MGI Symbol;Acc:MGI:2443387]	protein_coding	ENSMUST00000058524
ENSMUSG00000027637	-0.393747	0.0437883	1110008F13Rik	RIKEN cDNA 1110008F13 gene [Source:MGI Symbol;Acc:MGI:1914638]	protein_coding	ENSMUST00000029165,ENSMUST00000126767,ENSMUST00000152551,ENSMUST00000152942
ENSMUSG00000037343	-0.396302	0.035912	Taf2	TAF2 RNA polymerase II, TATA box binding protein (TBP)-associated factor [Source:MGI Symbol;Acc:MGI:2443028]	protein_coding	ENSMUST00000041733
ENSMUSG00000039244	-0.398125	0.0409117	E130309D02Rik	RIKEN cDNA E130309D02 gene [Source:MGI Symbol;Acc:MGI:2442621]	protein_coding	ENSMUST00000046418,ENSMUST00000159406,ENSMUST00000160498,ENSMUST00000162332
ENSMUSG00000051747	-0.400676	0.0497514	Ttn	titin [Source:MGI Symbol;Acc:MGI:98864]	protein_coding	ENSMUST00000011934,ENSMUST00000099980,ENSMUST00000099981,ENSMUST00000111846,ENSMUST00000111882,ENSMUST00000123448,ENSMUST00000123804,ENSMUST00000126515,ENSMUST00000128071,ENSMUST00000130915,ENSMUST00000134720,ENSMUST00000137854,ENSMUST00000138542,ENSMUST00000139832,ENSMUST00000140091,ENSMUST00000142251,ENSMUST00000147048,ENSMUST00000148747,ENSMUST00000149616,ENSMUST00000150741,ENSMUST00000151097,…
ENSMUSG00000078652	-0.401771	0.0390817	Psme3	proteaseome (prosome, macropain) activator subunit 3 (PA28 gamma, Ki) [Source:MGI Symbol;Acc:MGI:1096366]	protein_coding	ENSMUST00000019470,ENSMUST00000127998,ENSMUST00000131170,ENSMUST00000142640,ENSMUST00000151385
ENSMUSG00000022361	-0.402908	0.0393896	Zhx1	zinc fingers and homeoboxes 1 [Source:MGI Symbol;Acc:MGI:109271]	protein_coding	ENSMUST00000070143,ENSMUST00000110168,ENSMUST00000175805,ENSMUST00000176270,ENSMUST00000176713,ENSMUST00000177276
ENSMUSG00000079020	-0.404717	0.0351233	Slc45a4	solute carrier family 45, member 4 [Source:MGI Symbol;Acc:MGI:2146236]	protein_coding	ENSMUST00000054266,ENSMUST00000076224,ENSMUST00000130765,ENSMUST00000132607,ENSMUST00000144936,ENSMUST00000150409,ENSMUST00000151288,ENSMUST00000152558
ENSMUSG00000036904	-0.406742	0.0437883	Fzd8	frizzled homolog 8 (Drosophila) [Source:MGI Symbol;Acc:MGI:108460]	protein_coding	ENSMUST00000041080
ENSMUSG00000042426	-0.412288	0.0467829	Dhx29	DEAH (Asp-Glu-Ala-His) box polypeptide 29 [Source:MGI Symbol;Acc:MGI:2145374]	protein_coding	ENSMUST00000038574
ENSMUSG00000032840	-0.414548	0.0437883	2410131K14Rik	RIKEN cDNA 2410131K14 gene [Source:MGI Symbol;Acc:MGI:1924042]	protein_coding	ENSMUST00000049138
ENSMUSG00000050192	-0.415796	0.0388199	Eif5a2	eukaryotic translation initiation factor 5A2 [Source:MGI Symbol;Acc:MGI:1933735]	protein_coding	ENSMUST00000060500
ENSMUSG00000033624	-0.417309	0.0437883	Pdpr	pyruvate dehydrogenase phosphatase regulatory subunit [Source:MGI Symbol;Acc:MGI:2442188]	protein_coding	ENSMUST00000039333,ENSMUST00000135302,ENSMUST00000144377
ENSMUSG00000058056	-0.423253	0.0388199	Palld	palladin, cytoskeletal associated protein [Source:MGI Symbol;Acc:MGI:1919583]	protein_coding	ENSMUST00000034057,ENSMUST00000121200,ENSMUST00000121493,ENSMUST00000121785,ENSMUST00000123523,ENSMUST00000135439,ENSMUST00000136825,ENSMUST00000149042,ENSMUST00000153495
ENSMUSG00000046572	-0.434529	0.0349389	Zfp518b	zinc finger protein 518B [Source:MGI Symbol;Acc:MGI:2140750]	protein_coding	ENSMUST00000057258,ENSMUST00000178760,ENSMUST00000179555,ENSMUST00000180214
ENSMUSG00000037461	-0.442343	0.0444429	Ints7	integrator complex subunit 7 [Source:MGI Symbol;Acc:MGI:1924315]	protein_coding	ENSMUST00000045450
ENSMUSG00000068699	-0.442493	0.0466839	Flnc	filamin C, gamma [Source:MGI Symbol;Acc:MGI:95557]	protein_coding	ENSMUST00000065090,ENSMUST00000090474,ENSMUST00000101617,ENSMUST00000148404
ENSMUSG00000021339	-0.446364	0.0409117	Mrs2	MRS2 magnesium homeostasis factor homolog (S. cerevisiae) [Source:MGI Symbol;Acc:MGI:2685748]	protein_coding	ENSMUST00000021772
ENSMUSG00000050592	-0.454196	0.0160869	Fam78a	family with sequence similarity 78, member A [Source:MGI Symbol;Acc:MGI:2443569]	protein_coding	ENSMUST00000056406,ENSMUST00000130178,ENSMUST00000139629,ENSMUST00000143795
ENSMUSG00000053907	-0.457065	0.0235763	Mat2a	methionine adenosyltransferase II, alpha [Source:MGI Symbol;Acc:MGI:2443731]	protein_coding	ENSMUST00000059472
ENSMUSG00000031934	-0.458229	0.0477199	Panx1	pannexin 1 [Source:MGI Symbol;Acc:MGI:1860055]	protein_coding	ENSMUST00000056755,ENSMUST00000164273,ENSMUST00000166933,ENSMUST00000169288
ENSMUSG00000064367	-0.459957	0.0260037	mt-Nd5	mitochondrially encoded NADH dehydrogenase 5 [Source:MGI Symbol;Acc:MGI:102496]	protein_coding	ENSMUST00000082418
ENSMUSG00000001349	-0.476486	0.0371129	Cnn1	calponin 1 [Source:MGI Symbol;Acc:MGI:104979]	protein_coding	ENSMUST00000001384
ENSMUSG00000039270	-0.481922	0.0467829	Megf9	multiple EGF-like-domains 9 [Source:MGI Symbol;Acc:MGI:1918264]	protein_coding	ENSMUST00000037881,ENSMUST00000107359
ENSMUSG00000065947	-0.487461	0.0235537	mt-Nd4l	mitochondrially encoded NADH dehydrogenase 4L [Source:MGI Symbol;Acc:MGI:102497]	protein_coding	ENSMUST00000084013
ENSMUSG00000079243	-0.513911	0.0467829	Xirp1	xin actin-binding repeat containing 1 [Source:MGI Symbol;Acc:MGI:1333878]	protein_coding	ENSMUST00000111635
ENSMUSG00000058396	-0.516095	0.0235763	Gpr182	G protein-coupled receptor 182 [Source:MGI Symbol;Acc:MGI:109545]	protein_coding	ENSMUST00000079692
ENSMUSG00000037664	-0.530481	0.0348194	Cdkn1c	cyclin-dependent kinase inhibitor 1C (P57) [Source:MGI Symbol;Acc:MGI:104564]	protein_coding	ENSMUST00000037287,ENSMUST00000167912
ENSMUSG00000061436	-0.551277	0.0409117	Hipk2	homeodomain interacting protein kinase 2 [Source:MGI Symbol;Acc:MGI:1314872]	protein_coding	ENSMUST00000114855,ENSMUST00000159307,ENSMUST00000159894,ENSMUST00000160360,ENSMUST00000160962,ENSMUST00000161779,ENSMUST00000162359
ENSMUSG00000050234	-0.5749	0.0180784	Gja4	gap junction protein, alpha 4 [Source:MGI Symbol;Acc:MGI:95715]	protein_coding	ENSMUST00000053753
ENSMUSG00000031972	-0.575431	0.0244853	Acta1	actin, alpha 1, skeletal muscle [Source:MGI Symbol;Acc:MGI:87902]	protein_coding	ENSMUST00000034453
ENSMUSG00000049717	-0.576746	0.0356263	Lig4	ligase IV, DNA, ATP-dependent [Source:MGI Symbol;Acc:MGI:1335098]	protein_coding	ENSMUST00000095476,ENSMUST00000170033
ENSMUSG00000025986	-0.615927	0.0186251	Slc39a10	solute carrier family 39 (zinc transporter), member 10 [Source:MGI Symbol;Acc:MGI:1914515]	protein_coding	ENSMUST00000027131,ENSMUST00000141226,ENSMUST00000185520,ENSMUST00000186852
ENSMUSG00000030554	-0.637042	0.02979	Synm	synemin, intermediate filament protein [Source:MGI Symbol;Acc:MGI:2661187]	protein_coding	ENSMUST00000051389,ENSMUST00000074233
ENSMUSG00000007122	-0.658113	0.00418759	Casq1	calsequestrin 1 [Source:MGI Symbol;Acc:MGI:1309468]	protein_coding	ENSMUST00000003554,ENSMUST00000170638,ENSMUST00000170700
ENSMUSG00000039116	-0.664753	0.0397515	Gpr126	G protein-coupled receptor 126 [Source:MGI Symbol;Acc:MGI:1916151]	protein_coding	ENSMUST00000041168
ENSMUSG00000028698	-0.672514	0.00942067	Pik3r3	phosphatidylinositol 3 kinase, regulatory subunit, polypeptide 3 (p55) [Source:MGI Symbol;Acc:MGI:109277]	protein_coding	ENSMUST00000030464,ENSMUST00000106490,ENSMUST00000147292
ENSMUSG00000017679	-0.721056	0.0221191	Ttpal	tocopherol (alpha) transfer protein-like [Source:MGI Symbol;Acc:MGI:1923330]	protein_coding	ENSMUST00000109405,ENSMUST00000109408,ENSMUST00000132904,ENSMUST00000144729,ENSMUST00000152135,ENSMUST00000156839,ENSMUST00000171696
ENSMUSG00000014773	-0.901529	0.0437883	Dll1	delta-like 1 (Drosophila) [Source:MGI Symbol;Acc:MGI:104659]	protein_coding	ENSMUST00000014917,ENSMUST00000124196,ENSMUST00000129395,ENSMUST00000140784,ENSMUST00000143460,ENSMUST00000152416
ENSMUSG00000090053	-0.994389	0.0135386	Palm2	paralemmin 2 [Source:MGI Symbol;Acc:MGI:1934601]	protein_coding	ENSMUST00000102904,ENSMUST00000102905,ENSMUST00000131201,ENSMUST00000142556
ENSMUSG00000080875	-1.74195	0.0343291	Gm7332	predicted gene 7332 [Source:MGI Symbol;Acc:MGI:3643344]	pseudogene	ENSMUST00000118351
ENSMUSG00000027314	-3.42033	0.00349314	Dll4	delta-like 4 (Drosophila) [Source:MGI Symbol;Acc:MGI:1859388]	protein_coding	ENSMUST00000102517,ENSMUST00000127102

## Sheet: Dll4Cdh5 163Deg
ID	logFC	adj.P.Val	mgi_symbol	description	gene_biotype	ensembl_transcript_id
ENSMUSG00000098428	3.66906	0.0443135	Gm2260	predicted gene 2260 [Source:MGI Symbol;Acc:MGI:3780429]	processed_transcript	ENSMUST00000184236,ENSMUST00000184965
ENSMUSG00000031297	2.75623	0.0196918	Slc7a3	solute carrier family 7 (cationic amino acid transporter, y+ system), member 3 [Source:MGI Symbol;Acc:MGI:1100521]	protein_coding	ENSMUST00000073927,ENSMUST00000101362,ENSMUST00000113710,ENSMUST00000126282,ENSMUST00000138162,ENSMUST00000144410,ENSMUST00000151922
ENSMUSG00000027313	2.68058	0.0188544	Chac1	ChaC, cation transport regulator 1 [Source:MGI Symbol;Acc:MGI:1916315]	protein_coding	ENSMUST00000028780
ENSMUSG00000020641	1.95421	0.0188544	Rsad2	radical S-adenosyl methionine domain containing 2 [Source:MGI Symbol;Acc:MGI:1929628]	protein_coding	ENSMUST00000020970,ENSMUST00000137792,ENSMUST00000142732
ENSMUSG00000032715	1.9102	0.0223069	Trib3	tribbles homolog 3 (Drosophila) [Source:MGI Symbol;Acc:MGI:1345675]	protein_coding	ENSMUST00000040312,ENSMUST00000123145,ENSMUST00000124995
ENSMUSG00000019768	1.84356	0.0275806	Esr1	estrogen receptor 1 (alpha) [Source:MGI Symbol;Acc:MGI:1352467]	protein_coding	ENSMUST00000067086,ENSMUST00000105588,ENSMUST00000105589,ENSMUST00000105590,ENSMUST00000127145,ENSMUST00000127934,ENSMUST00000133985,ENSMUST00000137012,ENSMUST00000138828,ENSMUST00000149195
ENSMUSG00000005089	1.82979	0.0196918	Slc1a2	solute carrier family 1 (glial high affinity glutamate transporter), member 2 [Source:MGI Symbol;Acc:MGI:101931]	protein_coding	ENSMUST00000005220,ENSMUST00000080210,ENSMUST00000111212,ENSMUST00000111213,ENSMUST00000123759,ENSMUST00000125085,ENSMUST00000128622,ENSMUST00000136221,ENSMUST00000136488,ENSMUST00000137466,ENSMUST00000145921,ENSMUST00000154446
ENSMUSG00000074912	1.76957	0.0196918	Gm14207	predicted gene 14207 [Source:MGI Symbol;Acc:MGI:3649550]	processed_transcript	ENSMUST00000124439,ENSMUST00000147929,ENSMUST00000156538
ENSMUSG00000035165	1.75447	0.0245711	Kcne3	potassium voltage-gated channel, Isk-related subfamily, gene 3 [Source:MGI Symbol;Acc:MGI:1891124]	protein_coding	ENSMUST00000049333,ENSMUST00000170954,ENSMUST00000178946,ENSMUST00000179842
ENSMUSG00000030159	1.72273	0.0253124	Clec1b	C-type lectin domain family 1, member b [Source:MGI Symbol;Acc:MGI:1913287]	protein_coding	ENSMUST00000032262,ENSMUST00000112079,ENSMUST00000112081,ENSMUST00000133061
ENSMUSG00000029561	1.5443	0.033169	Oasl2	2'-5' oligoadenylate synthetase-like 2 [Source:MGI Symbol;Acc:MGI:1344390]	protein_coding	ENSMUST00000031542,ENSMUST00000124716,ENSMUST00000129707,ENSMUST00000137828,ENSMUST00000144064,ENSMUST00000146072,ENSMUST00000150361
ENSMUSG00000004939	1.44963	0.0242166	Nmrk2	nicotinamide riboside kinase 2 [Source:MGI Symbol;Acc:MGI:1916814]	protein_coding	ENSMUST00000005069
ENSMUSG00000044534	1.44811	0.0330697	Ackr2	atypical chemokine receptor 2 [Source:MGI Symbol;Acc:MGI:1891697]	protein_coding	ENSMUST00000050327
ENSMUSG00000050147	1.43398	0.0326786	F2rl3	coagulation factor II (thrombin) receptor-like 3 [Source:MGI Symbol;Acc:MGI:1298207]	protein_coding	ENSMUST00000058099
ENSMUSG00000027022	1.39364	0.0245711	Xirp2	xin actin-binding repeat containing 2 [Source:MGI Symbol;Acc:MGI:2685198]	protein_coding	ENSMUST00000028410,ENSMUST00000112347
ENSMUSG00000024164	1.38012	0.0179118	C3	complement component 3 [Source:MGI Symbol;Acc:MGI:88227]	protein_coding	ENSMUST00000024988,ENSMUST00000176457,ENSMUST00000177046,ENSMUST00000177425
ENSMUSG00000101389	1.33054	0.0443135	Ms4a4a	membrane-spanning 4-domains, subfamily A, member 4A [Source:MGI Symbol;Acc:MGI:3643932]	protein_coding	ENSMUST00000188995
ENSMUSG00000031762	1.21532	0.0179118	Mt2	metallothionein 2 [Source:MGI Symbol;Acc:MGI:97172]	protein_coding	ENSMUST00000034214
ENSMUSG00000040483	1.19069	0.0196918	Xaf1	XIAP associated factor 1 [Source:MGI Symbol;Acc:MGI:3772572]	protein_coding	ENSMUST00000094041,ENSMUST00000140842,ENSMUST00000142921,ENSMUST00000146233,ENSMUST00000151440
ENSMUSG00000025492	1.14428	0.0188544	Ifitm3	interferon induced transmembrane protein 3 [Source:MGI Symbol;Acc:MGI:1913391]	protein_coding	ENSMUST00000026565
ENSMUSG00000009654	1.12434	0.0227079	Oit3	oncoprotein induced transcript 3 [Source:MGI Symbol;Acc:MGI:1201782]	protein_coding	ENSMUST00000009798,ENSMUST00000162493
ENSMUSG00000020723	1.12011	0.0330697	Cacng4	calcium channel, voltage-dependent, gamma subunit 4 [Source:MGI Symbol;Acc:MGI:1859167]	protein_coding	ENSMUST00000021066,ENSMUST00000134076
ENSMUSG00000046223	1.11932	0.0248446	Plaur	plasminogen activator, urokinase receptor [Source:MGI Symbol;Acc:MGI:97612]	protein_coding	ENSMUST00000002284
ENSMUSG00000029752	1.11734	0.0216265	Asns	asparagine synthetase [Source:MGI Symbol;Acc:MGI:1350929]	protein_coding	ENSMUST00000031766,ENSMUST00000115542,ENSMUST00000126303,ENSMUST00000133972,ENSMUST00000139596,ENSMUST00000140097,ENSMUST00000148349
ENSMUSG00000046718	1.08605	0.0280854	Bst2	bone marrow stromal cell antigen 2 [Source:MGI Symbol;Acc:MGI:1916800]	protein_coding	ENSMUST00000051672
ENSMUSG00000030683	1.07166	0.0245711	Sez6l2	seizure related 6 homolog like 2 [Source:MGI Symbol;Acc:MGI:2385295]	protein_coding	ENSMUST00000106332,ENSMUST00000106333,ENSMUST00000106335,ENSMUST00000125669,ENSMUST00000134471,ENSMUST00000146017,ENSMUST00000155138
ENSMUSG00000020638	1.066	0.0253124	Cmpk2	cytidine monophosphate (UMP-CMP) kinase 2, mitochondrial [Source:MGI Symbol;Acc:MGI:99830]	protein_coding	ENSMUST00000020969
ENSMUSG00000020303	1.03938	0.0179118	Stc2	stanniocalcin 2 [Source:MGI Symbol;Acc:MGI:1316731]	protein_coding	ENSMUST00000020546,ENSMUST00000134199,ENSMUST00000139991,ENSMUST00000149467,ENSMUST00000152094
ENSMUSG00000021822	0.974947	0.0179118	Plau	plasminogen activator, urokinase [Source:MGI Symbol;Acc:MGI:97611]	protein_coding	ENSMUST00000022368
ENSMUSG00000027580	0.974265	0.0297412	Helz2	helicase with zinc finger 2, transcriptional coactivator [Source:MGI Symbol;Acc:MGI:2385169]	protein_coding	ENSMUST00000094203,ENSMUST00000108831,ENSMUST00000121484,ENSMUST00000149417,ENSMUST00000155049
ENSMUSG00000034422	0.967855	0.0196918	Parp14	poly (ADP-ribose) polymerase family, member 14 [Source:MGI Symbol;Acc:MGI:1919489]	protein_coding	ENSMUST00000042665,ENSMUST00000135669,ENSMUST00000142946
ENSMUSG00000012519	0.943521	0.0458348	Mlkl	mixed lineage kinase domain-like [Source:MGI Symbol;Acc:MGI:1921818]	protein_coding	ENSMUST00000056157,ENSMUST00000120432,ENSMUST00000135710,ENSMUST00000145862
ENSMUSG00000091971	0.931221	0.0443135	Hspa1a	heat shock protein 1A [Source:MGI Symbol;Acc:MGI:96244]	protein_coding	ENSMUST00000087328
ENSMUSG00000027221	0.925315	0.0188544	Chst1	carbohydrate (keratan sulfate Gal-6) sulfotransferase 1 [Source:MGI Symbol;Acc:MGI:1924219]	protein_coding	ENSMUST00000065797
ENSMUSG00000019970	0.917393	0.0179118	Sgk1	serum/glucocorticoid regulated kinase 1 [Source:MGI Symbol;Acc:MGI:1340062]	protein_coding	ENSMUST00000020145,ENSMUST00000092673,ENSMUST00000100036,ENSMUST00000120509,ENSMUST00000124203,ENSMUST00000124350,ENSMUST00000126560,ENSMUST00000135195,ENSMUST00000141218,ENSMUST00000142174,ENSMUST00000143094,ENSMUST00000150089,ENSMUST00000164659
ENSMUSG00000005667	0.912467	0.0142012	Mthfd2	methylenetetrahydrofolate dehydrogenase (NAD+ dependent), methenyltetrahydrofolate cyclohydrolase [Source:MGI Symbol;Acc:MGI:1338850]	protein_coding	ENSMUST00000005810,ENSMUST00000139802,ENSMUST00000141044,ENSMUST00000141193
ENSMUSG00000047735	0.899415	0.0196918	Samd9l	sterile alpha motif domain containing 9-like [Source:MGI Symbol;Acc:MGI:1343184]	protein_coding	ENSMUST00000120087,ENSMUST00000183576
ENSMUSG00000021250	0.893719	0.0476213	Fos	FBJ osteosarcoma oncogene [Source:MGI Symbol;Acc:MGI:95574]	protein_coding	ENSMUST00000021674,ENSMUST00000134311,ENSMUST00000136122,ENSMUST00000140525
ENSMUSG00000034738	0.887615	0.0253124	Nostrin	nitric oxide synthase trafficker [Source:MGI Symbol;Acc:MGI:3606242]	protein_coding	ENSMUST00000041865,ENSMUST00000141276
ENSMUSG00000030707	0.886716	0.0196918	Coro1a	coronin, actin binding protein 1A [Source:MGI Symbol;Acc:MGI:1345961]	protein_coding	ENSMUST00000032949,ENSMUST00000106364,ENSMUST00000123511,ENSMUST00000126193,ENSMUST00000131415,ENSMUST00000133718,ENSMUST00000135087,ENSMUST00000140896,ENSMUST00000173108,ENSMUST00000173116,ENSMUST00000174579
ENSMUSG00000042734	0.884343	0.0334093	Ttc9	tetratricopeptide repeat domain 9 [Source:MGI Symbol;Acc:MGI:1916730]	protein_coding	ENSMUST00000036116
ENSMUSG00000035105	0.883138	0.0367977	Egln3	egl-9 family hypoxia-inducible factor 3 [Source:MGI Symbol;Acc:MGI:1932288]	protein_coding	ENSMUST00000039516
ENSMUSG00000042116	0.877401	0.0179118	Vwa1	von Willebrand factor A domain containing 1 [Source:MGI Symbol;Acc:MGI:2179729]	protein_coding	ENSMUST00000042196
ENSMUSG00000032495	0.874549	0.0254976	Lrrc2	leucine rich repeat containing 2 [Source:MGI Symbol;Acc:MGI:1921499]	protein_coding	ENSMUST00000035076
ENSMUSG00000031461	0.850488	0.0216265	Myom2	myomesin 2 [Source:MGI Symbol;Acc:MGI:1328358]	protein_coding	ENSMUST00000033842,ENSMUST00000131251,ENSMUST00000135393,ENSMUST00000135908,ENSMUST00000140033
ENSMUSG00000023951	0.849379	0.0179118	Vegfa	vascular endothelial growth factor A [Source:MGI Symbol;Acc:MGI:103178]	protein_coding	ENSMUST00000024747,ENSMUST00000071648,ENSMUST00000113519,ENSMUST00000113520,ENSMUST00000133605,ENSMUST00000142321,ENSMUST00000142351,ENSMUST00000143985,ENSMUST00000146149,ENSMUST00000150327,ENSMUST00000167860
ENSMUSG00000020178	0.826727	0.0265766	Adora2a	adenosine A2a receptor [Source:MGI Symbol;Acc:MGI:99402]	protein_coding	ENSMUST00000105420
ENSMUSG00000090698	0.807824	0.0260043	Apold1	apolipoprotein L domain containing 1 [Source:MGI Symbol;Acc:MGI:2685921]	protein_coding	ENSMUST00000167323
ENSMUSG00000002289	0.803122	0.0188544	Angptl4	angiopoietin-like 4 [Source:MGI Symbol;Acc:MGI:1888999]	protein_coding	ENSMUST00000002360,ENSMUST00000173869,ENSMUST00000174858,ENSMUST00000174872
ENSMUSG00000006574	0.796282	0.0253124	Slc4a1	solute carrier family 4 (anion exchanger), member 1 [Source:MGI Symbol;Acc:MGI:109393]	protein_coding	ENSMUST00000006749,ENSMUST00000128405,ENSMUST00000145636,ENSMUST00000149993,ENSMUST00000151050
ENSMUSG00000022579	0.794689	0.0301635	Gpihbp1	GPI-anchored HDL-binding protein 1 [Source:MGI Symbol;Acc:MGI:1915703]	protein_coding	ENSMUST00000023243,ENSMUST00000186934,ENSMUST00000189874,ENSMUST00000189944,ENSMUST00000190119
ENSMUSG00000020911	0.793306	0.0196918	Krt19	keratin 19 [Source:MGI Symbol;Acc:MGI:96693]	protein_coding	ENSMUST00000007317,ENSMUST00000125888,ENSMUST00000126460
ENSMUSG00000030653	0.7824	0.0179118	Pde2a	phosphodiesterase 2A, cGMP-stimulated [Source:MGI Symbol;Acc:MGI:2446107]	protein_coding	ENSMUST00000084894,ENSMUST00000163751,ENSMUST00000166652
ENSMUSG00000004837	0.728818	0.0412612	Grap	GRB2-related adaptor protein [Source:MGI Symbol;Acc:MGI:1918770]	protein_coding	ENSMUST00000004959,ENSMUST00000155380
ENSMUSG00000042622	0.726539	0.0265766	Maff	v-maf musculoaponeurotic fibrosarcoma oncogene family, protein F (avian) [Source:MGI Symbol;Acc:MGI:96910]	protein_coding	ENSMUST00000096350,ENSMUST00000163691
ENSMUSG00000030406	0.721167	0.0179118	Gipr	gastric inhibitory polypeptide receptor [Source:MGI Symbol;Acc:MGI:1352753]	protein_coding	ENSMUST00000094790
ENSMUSG00000062515	0.716034	0.0179118	Fabp4	fatty acid binding protein 4, adipocyte [Source:MGI Symbol;Acc:MGI:88038]	protein_coding	ENSMUST00000029041
ENSMUSG00000031765	0.713751	0.0179118	Mt1	metallothionein 1 [Source:MGI Symbol;Acc:MGI:97171]	protein_coding	ENSMUST00000034215
ENSMUSG00000047261	0.703051	0.0280217	Gap43	growth associated protein 43 [Source:MGI Symbol;Acc:MGI:95639]	protein_coding	ENSMUST00000102817,ENSMUST00000125187
ENSMUSG00000047180	0.700016	0.0412582	Neurl3	neuralized homolog 3 homolog (Drosophila) [Source:MGI Symbol;Acc:MGI:2429944]	protein_coding	ENSMUST00000056946,ENSMUST00000188666
ENSMUSG00000046879	0.699518	0.0378151	Irgm1	immunity-related GTPase family M member 1 [Source:MGI Symbol;Acc:MGI:107567]	protein_coding	ENSMUST00000049519,ENSMUST00000097271,ENSMUST00000147151
ENSMUSG00000017309	0.693324	0.0179118	Cd300lg	CD300 antigen like family member G [Source:MGI Symbol;Acc:MGI:1289168]	protein_coding	ENSMUST00000017453,ENSMUST00000107163,ENSMUST00000107164,ENSMUST00000123895
ENSMUSG00000023067	0.676375	0.0234591	Cdkn1a	cyclin-dependent kinase inhibitor 1A (P21) [Source:MGI Symbol;Acc:MGI:104556]	protein_coding	ENSMUST00000023829,ENSMUST00000119901,ENSMUST00000122348
ENSMUSG00000037010	0.667801	0.0450629	Apln	apelin [Source:MGI Symbol;Acc:MGI:1353624]	protein_coding	ENSMUST00000039026
ENSMUSG00000040710	0.667033	0.0378151	St8sia4	ST8 alpha-N-acetyl-neuraminide alpha-2,8-sialyltransferase 4 [Source:MGI Symbol;Acc:MGI:106018]	protein_coding	ENSMUST00000043336,ENSMUST00000186853,ENSMUST00000187936,ENSMUST00000189556
ENSMUSG00000020357	0.666934	0.0196918	Flt4	FMS-like tyrosine kinase 4 [Source:MGI Symbol;Acc:MGI:95561]	protein_coding	ENSMUST00000020617,ENSMUST00000152253
ENSMUSG00000005413	0.665625	0.0330697	Hmox1	heme oxygenase (decycling) 1 [Source:MGI Symbol;Acc:MGI:96163]	protein_coding	ENSMUST00000005548,ENSMUST00000159631,ENSMUST00000160341
ENSMUSG00000068735	0.660351	0.0199181	Trp53i11	transformation related protein 53 inducible protein 11 [Source:MGI Symbol;Acc:MGI:2670995]	protein_coding	ENSMUST00000090554,ENSMUST00000111266,ENSMUST00000127173,ENSMUST00000132182,ENSMUST00000140172,ENSMUST00000143164,ENSMUST00000147377,ENSMUST00000150462
ENSMUSG00000045534	0.659268	0.0179118	Kcna5	potassium voltage-gated channel, shaker-related subfamily, member 5 [Source:MGI Symbol;Acc:MGI:96662]	protein_coding	ENSMUST00000060972
ENSMUSG00000018906	0.656784	0.0188544	P4ha2	procollagen-proline, 2-oxoglutarate 4-dioxygenase (proline 4-hydroxylase), alpha II polypeptide [Source:MGI Symbol;Acc:MGI:894286]	protein_coding	ENSMUST00000019050,ENSMUST00000093107,ENSMUST00000125132,ENSMUST00000125651,ENSMUST00000126840,ENSMUST00000129499,ENSMUST00000135596,ENSMUST00000135653,ENSMUST00000138477,ENSMUST00000139315,ENSMUST00000141258,ENSMUST00000142583,ENSMUST00000151218,ENSMUST00000155299,ENSMUST00000174616
ENSMUSG00000000489	0.655326	0.0196918	Pdgfb	platelet derived growth factor, B polypeptide [Source:MGI Symbol;Acc:MGI:97528]	protein_coding	ENSMUST00000000500
ENSMUSG00000001053	0.642073	0.0196918	N4bp3	NEDD4 binding protein 3 [Source:MGI Symbol;Acc:MGI:2442218]	protein_coding	ENSMUST00000001080,ENSMUST00000142721,ENSMUST00000156835
ENSMUSG00000030103	0.641398	0.0378151	Bhlhe40	basic helix-loop-helix family, member e40 [Source:MGI Symbol;Acc:MGI:1097714]	protein_coding	ENSMUST00000032194,ENSMUST00000163617,ENSMUST00000166346
ENSMUSG00000025408	0.637221	0.0254976	Ddit3	DNA-damage inducible transcript 3 [Source:MGI Symbol;Acc:MGI:109247]	protein_coding	ENSMUST00000026475,ENSMUST00000134686,ENSMUST00000139091
ENSMUSG00000011179	0.636315	0.0253124	Odc1	ornithine decarboxylase, structural 1 [Source:MGI Symbol;Acc:MGI:97402]	protein_coding	ENSMUST00000171737
ENSMUSG00000001123	0.634036	0.0412604	Lgals9	lectin, galactose binding, soluble 9 [Source:MGI Symbol;Acc:MGI:109496]	protein_coding	ENSMUST00000073001,ENSMUST00000108268,ENSMUST00000108269,ENSMUST00000140073
ENSMUSG00000025161	0.632715	0.0196918	Slc16a3	solute carrier family 16 (monocarboxylic acid transporters), member 3 [Source:MGI Symbol;Acc:MGI:1933438]	protein_coding	ENSMUST00000070653,ENSMUST00000100130,ENSMUST00000129473,ENSMUST00000133029,ENSMUST00000134540,ENSMUST00000140467,ENSMUST00000154187,ENSMUST00000168579
ENSMUSG00000038539	0.630785	0.0179118	Atf5	activating transcription factor 5 [Source:MGI Symbol;Acc:MGI:2141857]	protein_coding	ENSMUST00000047356,ENSMUST00000107893
ENSMUSG00000039706	0.621221	0.0179118	Ldb2	LIM domain binding 2 [Source:MGI Symbol;Acc:MGI:894670]	protein_coding	ENSMUST00000070748
ENSMUSG00000051375	0.613171	0.0254976	Pcdh1	protocadherin 1 [Source:MGI Symbol;Acc:MGI:104692]	protein_coding	ENSMUST00000057185,ENSMUST00000159405,ENSMUST00000160721,ENSMUST00000161701
ENSMUSG00000032596	0.599273	0.0412612	Uba7	ubiquitin-like modifier activating enzyme 7 [Source:MGI Symbol;Acc:MGI:1349462]	protein_coding	ENSMUST00000035216,ENSMUST00000075082,ENSMUST00000175933,ENSMUST00000176037,ENSMUST00000176340,ENSMUST00000176478,ENSMUST00000176673,ENSMUST00000176743,ENSMUST00000176842,ENSMUST00000176858,ENSMUST00000177039,ENSMUST00000177071,ENSMUST00000177096,ENSMUST00000177392,ENSMUST00000177494
ENSMUSG00000026921	0.595281	0.0179118	Egfl7	EGF-like domain 7 [Source:MGI Symbol;Acc:MGI:2449923]	protein_coding	ENSMUST00000100290,ENSMUST00000102907,ENSMUST00000131112,ENSMUST00000139801,ENSMUST00000145575,ENSMUST00000147351,ENSMUST00000149460,ENSMUST00000149789,ENSMUST00000150404,ENSMUST00000152713,ENSMUST00000152988,ENSMUST00000166920,ENSMUST00000172683,ENSMUST00000173777,ENSMUST00000173920,ENSMUST00000174211,ENSMUST00000174465,ENSMUST00000174572,ENSMUST00000174656
ENSMUSG00000061232	0.594562	0.0430808	H2-K1	histocompatibility 2, K1, K region [Source:MGI Symbol;Acc:MGI:95904]	protein_coding	ENSMUST00000025181,ENSMUST00000087189,ENSMUST00000114311,ENSMUST00000172782,ENSMUST00000172912,ENSMUST00000173075,ENSMUST00000173317,ENSMUST00000173543,ENSMUST00000173602
ENSMUSG00000020407	0.580679	0.0265766	Upp1	uridine phosphorylase 1 [Source:MGI Symbol;Acc:MGI:1097668]	protein_coding	ENSMUST00000020677,ENSMUST00000101525,ENSMUST00000130522,ENSMUST00000146696,ENSMUST00000164791,ENSMUST00000166455,ENSMUST00000168121,ENSMUST00000170444,ENSMUST00000172452
ENSMUSG00000033361	0.578696	0.0367977	Prrg3	proline rich Gla (G-carboxyglutamic acid) 3 (transmembrane) [Source:MGI Symbol;Acc:MGI:2685214]	protein_coding	ENSMUST00000048790,ENSMUST00000126362,ENSMUST00000170096
ENSMUSG00000026104	0.574377	0.0357206	Stat1	signal transducer and activator of transcription 1 [Source:MGI Symbol;Acc:MGI:103063]	protein_coding	ENSMUST00000070968,ENSMUST00000185743,ENSMUST00000186057,ENSMUST00000186186,ENSMUST00000186574,ENSMUST00000186857,ENSMUST00000188681,ENSMUST00000189075,ENSMUST00000189244,ENSMUST00000189336,ENSMUST00000189347,ENSMUST00000191435
ENSMUSG00000019916	0.563211	0.0297412	P4ha1	procollagen-proline, 2-oxoglutarate 4-dioxygenase (proline 4-hydroxylase), alpha 1 polypeptide [Source:MGI Symbol;Acc:MGI:97463]	protein_coding	ENSMUST00000009789,ENSMUST00000092512,ENSMUST00000105466
ENSMUSG00000000317	0.56223	0.0179118	Bcl6b	B cell CLL/lymphoma 6, member B [Source:MGI Symbol;Acc:MGI:1278332]	protein_coding	ENSMUST00000000326,ENSMUST00000140542,ENSMUST00000153449
ENSMUSG00000018169	0.560307	0.0253124	Mfng	MFNG O-fucosylpeptide 3-beta-N-acetylglucosaminyltransferase [Source:MGI Symbol;Acc:MGI:1095404]	protein_coding	ENSMUST00000018313,ENSMUST00000123518,ENSMUST00000128389,ENSMUST00000136795
ENSMUSG00000025403	0.555868	0.0179118	Shmt2	serine hydroxymethyltransferase 2 (mitochondrial) [Source:MGI Symbol;Acc:MGI:1277989]	protein_coding	ENSMUST00000026470
ENSMUSG00000019055	0.551258	0.0202549	Plod1	procollagen-lysine, 2-oxoglutarate 5-dioxygenase 1 [Source:MGI Symbol;Acc:MGI:99907]	protein_coding	ENSMUST00000019199,ENSMUST00000105712,ENSMUST00000124041,ENSMUST00000124292,ENSMUST00000132075,ENSMUST00000149129
ENSMUSG00000022620	0.532125	0.0196918	Arsa	arylsulfatase A [Source:MGI Symbol;Acc:MGI:88077]	protein_coding	ENSMUST00000023292,ENSMUST00000165199,ENSMUST00000168052,ENSMUST00000168270
ENSMUSG00000016458	0.526261	0.0443135	Wt1	Wilms tumor 1 homolog [Source:MGI Symbol;Acc:MGI:98968]	protein_coding	ENSMUST00000111098,ENSMUST00000111099,ENSMUST00000133470,ENSMUST00000139585,ENSMUST00000143043,ENSMUST00000145107,ENSMUST00000146842,ENSMUST00000153944
ENSMUSG00000037679	0.525926	0.0280854	Inf2	inverted formin, FH2 and WH2 domain containing [Source:MGI Symbol;Acc:MGI:1917685]	protein_coding	ENSMUST00000101029
ENSMUSG00000040732	0.523664	0.0242166	Erg	avian erythroblastosis virus E-26 (v-ets) oncogene related [Source:MGI Symbol;Acc:MGI:95415]	protein_coding	ENSMUST00000077773,ENSMUST00000113846,ENSMUST00000113848,ENSMUST00000118113,ENSMUST00000121809,ENSMUST00000122199,ENSMUST00000171646,ENSMUST00000176345,ENSMUST00000177450
ENSMUSG00000078566	0.520528	0.036301	Bnip3	BCL2/adenovirus E1B interacting protein 3 [Source:MGI Symbol;Acc:MGI:109326]	protein_coding	ENSMUST00000106112,ENSMUST00000125359,ENSMUST00000130500,ENSMUST00000141223,ENSMUST00000148970
ENSMUSG00000029309	0.50506	0.0254976	Sparcl1	SPARC-like 1 [Source:MGI Symbol;Acc:MGI:108110]	protein_coding	ENSMUST00000031249
ENSMUSG00000021196	0.504365	0.0460789	Pfkp	phosphofructokinase, platelet [Source:MGI Symbol;Acc:MGI:1891833]	protein_coding	ENSMUST00000021614,ENSMUST00000131648,ENSMUST00000133041,ENSMUST00000135761,ENSMUST00000136585,ENSMUST00000137327,ENSMUST00000138703,ENSMUST00000142372,ENSMUST00000142972,ENSMUST00000144053,ENSMUST00000148999,ENSMUST00000151894,ENSMUST00000154100
ENSMUSG00000001029	0.503629	0.0179118	Icam2	intercellular adhesion molecule 2 [Source:MGI Symbol;Acc:MGI:96394]	protein_coding	ENSMUST00000001055,ENSMUST00000106809,ENSMUST00000106813,ENSMUST00000141146,ENSMUST00000173795
ENSMUSG00000041515	0.487402	0.0396497	Irf8	interferon regulatory factor 8 [Source:MGI Symbol;Acc:MGI:96395]	protein_coding	ENSMUST00000047737,ENSMUST00000160388,ENSMUST00000160594,ENSMUST00000160943,ENSMUST00000162001,ENSMUST00000162658,ENSMUST00000162775
ENSMUSG00000061119	0.484544	0.0265766	Prcp	prolylcarboxypeptidase (angiotensinase C) [Source:MGI Symbol;Acc:MGI:1919711]	protein_coding	ENSMUST00000076052
ENSMUSG00000054435	0.479675	0.0293501	Gimap4	GTPase, IMAP family member 4 [Source:MGI Symbol;Acc:MGI:1349656]	protein_coding	ENSMUST00000067506,ENSMUST00000090070,ENSMUST00000118802,ENSMUST00000119575,ENSMUST00000121957,ENSMUST00000156770
ENSMUSG00000019960	0.474322	0.0443135	Dusp6	dual specificity phosphatase 6 [Source:MGI Symbol;Acc:MGI:1914853]	protein_coding	ENSMUST00000020118
ENSMUSG00000046865	0.471294	0.0476213	Fbl	fibrillarin [Source:MGI Symbol;Acc:MGI:95486]	protein_coding	ENSMUST00000042405
ENSMUSG00000024440	0.461954	0.0443135	Pcdh12	protocadherin 12 [Source:MGI Symbol;Acc:MGI:1855700]	protein_coding	ENSMUST00000025311
ENSMUSG00000039157	0.456533	0.0476213	Fam102a	family with sequence similarity 102, member A [Source:MGI Symbol;Acc:MGI:2138935]	protein_coding	ENSMUST00000048375,ENSMUST00000133366,ENSMUST00000133512,ENSMUST00000136816,ENSMUST00000147723
ENSMUSG00000028988	0.456078	0.0412604	Ctnnbip1	catenin beta interacting protein 1 [Source:MGI Symbol;Acc:MGI:1915756]	protein_coding	ENSMUST00000030839,ENSMUST00000105692
ENSMUSG00000044338	0.453175	0.0265766	Aplnr	apelin receptor [Source:MGI Symbol;Acc:MGI:1346086]	protein_coding	ENSMUST00000057019,ENSMUST00000184728
ENSMUSG00000039956	0.449565	0.0443135	Mrap	melanocortin 2 receptor accessory protein [Source:MGI Symbol;Acc:MGI:1924287]	protein_coding	ENSMUST00000038197,ENSMUST00000125429,ENSMUST00000133973,ENSMUST00000138984
ENSMUSG00000027333	0.443465	0.0330697	Smox	spermine oxidase [Source:MGI Symbol;Acc:MGI:2445356]	protein_coding	ENSMUST00000028806,ENSMUST00000110179,ENSMUST00000110180,ENSMUST00000110181,ENSMUST00000110182,ENSMUST00000110183,ENSMUST00000110186,ENSMUST00000110188,ENSMUST00000110189,ENSMUST00000129143,ENSMUST00000131698,ENSMUST00000149180,ENSMUST00000151143,ENSMUST00000151627,ENSMUST00000183575,ENSMUST00000183881,ENSMUST00000183947
ENSMUSG00000052921	0.441928	0.0329106	Arhgef15	Rho guanine nucleotide exchange factor (GEF) 15 [Source:MGI Symbol;Acc:MGI:3045246]	protein_coding	ENSMUST00000065040,ENSMUST00000108670,ENSMUST00000108671,ENSMUST00000131686,ENSMUST00000141747,ENSMUST00000151520
ENSMUSG00000073411	0.439766	0.0450629	H2-D1	histocompatibility 2, D region locus 1 [Source:MGI Symbol;Acc:MGI:95896]	protein_coding	ENSMUST00000172503,ENSMUST00000172785,ENSMUST00000173167,ENSMUST00000174325
ENSMUSG00000027533	0.435033	0.0443135	Fabp5	fatty acid binding protein 5, epidermal [Source:MGI Symbol;Acc:MGI:101790]	protein_coding	ENSMUST00000029046,ENSMUST00000123744
ENSMUSG00000020263	0.434201	0.0443135	Appl2	adaptor protein, phosphotyrosine interaction, PH domain and leucine zipper containing 2 [Source:MGI Symbol;Acc:MGI:2384914]	protein_coding	ENSMUST00000020500,ENSMUST00000127788,ENSMUST00000130285,ENSMUST00000133719,ENSMUST00000141048,ENSMUST00000146876,ENSMUST00000147118,ENSMUST00000147582,ENSMUST00000148096,ENSMUST00000150351,ENSMUST00000150685,ENSMUST00000176294,ENSMUST00000176675,ENSMUST00000177187
ENSMUSG00000041757	0.431547	0.0378151	Plekha6	pleckstrin homology domain containing, family A member 6 [Source:MGI Symbol;Acc:MGI:2388662]	protein_coding	ENSMUST00000038295,ENSMUST00000105082,ENSMUST00000186917,ENSMUST00000187285,ENSMUST00000187299,ENSMUST00000189598,ENSMUST00000190186,ENSMUST00000190208,ENSMUST00000190694,ENSMUST00000190884
ENSMUSG00000027397	0.431009	0.0443135	Slc20a1	solute carrier family 20, member 1 [Source:MGI Symbol;Acc:MGI:108392]	protein_coding	ENSMUST00000028880,ENSMUST00000110315,ENSMUST00000125714,ENSMUST00000140907,ENSMUST00000141285,ENSMUST00000144025,ENSMUST00000144744,ENSMUST00000148988
ENSMUSG00000061024	0.430338	0.0442868	Rrs1	RRS1 ribosome biogenesis regulator homolog (S. cerevisiae) [Source:MGI Symbol;Acc:MGI:1929721]	protein_coding	ENSMUST00000072079
ENSMUSG00000049866	0.422241	0.0254976	Arl4c	ADP-ribosylation factor-like 4C [Source:MGI Symbol;Acc:MGI:2445172]	protein_coding	ENSMUST00000051236,ENSMUST00000159814,ENSMUST00000187810
ENSMUSG00000001946	0.412352	0.0229878	Esam	endothelial cell-specific adhesion molecule [Source:MGI Symbol;Acc:MGI:1916774]	protein_coding	ENSMUST00000002011,ENSMUST00000123198,ENSMUST00000131832,ENSMUST00000144596,ENSMUST00000146860
ENSMUSG00000040033	0.411506	0.0493939	Stat2	signal transducer and activator of transcription 2 [Source:MGI Symbol;Acc:MGI:103039]	protein_coding	ENSMUST00000085708,ENSMUST00000105238
ENSMUSG00000054690	0.410926	0.0265766	Emcn	endomucin [Source:MGI Symbol;Acc:MGI:1891716]	protein_coding	ENSMUST00000119475,ENSMUST00000122064,ENSMUST00000128985
ENSMUSG00000002233	0.40642	0.0265766	Rhoc	ras homolog gene family, member C [Source:MGI Symbol;Acc:MGI:106028]	protein_coding	ENSMUST00000002303,ENSMUST00000106787,ENSMUST00000132721,ENSMUST00000176347
ENSMUSG00000038412	0.404143	0.0367977	Higd1a	HIG1 domain family, member 1A [Source:MGI Symbol;Acc:MGI:1930666]	protein_coding	ENSMUST00000060251
ENSMUSG00000046546	0.399167	0.0493939	Fam43a	family with sequence similarity 43, member A [Source:MGI Symbol;Acc:MGI:2676309]	protein_coding	ENSMUST00000059078
ENSMUSG00000007655	0.393226	0.0303404	Cav1	caveolin 1, caveolae protein [Source:MGI Symbol;Acc:MGI:102709]	protein_coding	ENSMUST00000007799,ENSMUST00000115453,ENSMUST00000115454,ENSMUST00000115455,ENSMUST00000115456,ENSMUST00000123439,ENSMUST00000130505,ENSMUST00000133065,ENSMUST00000150901,ENSMUST00000177234
ENSMUSG00000028041	0.389745	0.0436706	Adam15	a disintegrin and metallopeptidase domain 15 (metargidin) [Source:MGI Symbol;Acc:MGI:1333882]	protein_coding	ENSMUST00000029676,ENSMUST00000074582,ENSMUST00000107446,ENSMUST00000107448,ENSMUST00000134590,ENSMUST00000134839,ENSMUST00000139705,ENSMUST00000144608,ENSMUST00000148068,ENSMUST00000155295,ENSMUST00000155868,ENSMUST00000156250,ENSMUST00000184651
ENSMUSG00000023942	0.383295	0.0497363	Slc29a1	solute carrier family 29 (nucleoside transporters), member 1 [Source:MGI Symbol;Acc:MGI:1927073]	protein_coding	ENSMUST00000051574,ENSMUST00000064889,ENSMUST00000097317,ENSMUST00000163492,ENSMUST00000163905,ENSMUST00000164217,ENSMUST00000164618,ENSMUST00000164769,ENSMUST00000166119,ENSMUST00000166633,ENSMUST00000167195,ENSMUST00000167332,ENSMUST00000167692,ENSMUST00000167748,ENSMUST00000167863,ENSMUST00000168274,ENSMUST00000169729,ENSMUST00000170113,ENSMUST00000170425,ENSMUST00000170488,ENSMUST00000171081,…
ENSMUSG00000022895	0.38001	0.0334093	Ets2	E26 avian leukemia oncogene 2, 3' domain [Source:MGI Symbol;Acc:MGI:95456]	protein_coding	ENSMUST00000023612,ENSMUST00000140544,ENSMUST00000143554,ENSMUST00000145509,ENSMUST00000155226
ENSMUSG00000021892	0.378108	0.0264805	Sh3bp5	SH3-domain binding protein 5 (BTK-associated) [Source:MGI Symbol;Acc:MGI:1344391]	protein_coding	ENSMUST00000091903,ENSMUST00000100730,ENSMUST00000140002,ENSMUST00000147586
ENSMUSG00000042228	0.369482	0.0329106	Lyn	Yamaguchi sarcoma viral (v-yes-1) oncogene homolog [Source:MGI Symbol;Acc:MGI:96892]	protein_coding	ENSMUST00000041377,ENSMUST00000103010,ENSMUST00000137943,ENSMUST00000145083
ENSMUSG00000031987	0.365119	0.0396497	Egln1	egl-9 family hypoxia-inducible factor 1 [Source:MGI Symbol;Acc:MGI:1932286]	protein_coding	ENSMUST00000034469
ENSMUSG00000057329	0.363711	0.0396497	Bcl2	B cell leukemia/lymphoma 2 [Source:MGI Symbol;Acc:MGI:88138]	protein_coding	ENSMUST00000112751,ENSMUST00000189999
ENSMUSG00000029528	0.353303	0.0443135	Pxn	paxillin [Source:MGI Symbol;Acc:MGI:108295]	protein_coding	ENSMUST00000067268,ENSMUST00000086523,ENSMUST00000125007,ENSMUST00000125054,ENSMUST00000127345,ENSMUST00000129897,ENSMUST00000134198,ENSMUST00000137716,ENSMUST00000138139,ENSMUST00000139834,ENSMUST00000152156,ENSMUST00000153682,ENSMUST00000157050
ENSMUSG00000019487	0.347032	0.0456414	Trip10	thyroid hormone receptor interactor 10 [Source:MGI Symbol;Acc:MGI:2146901]	protein_coding	ENSMUST00000019631
ENSMUSG00000068739	0.344951	0.0396497	Sars	seryl-aminoacyl-tRNA synthetase [Source:MGI Symbol;Acc:MGI:102809]	protein_coding	ENSMUST00000090553,ENSMUST00000102625,ENSMUST00000132467,ENSMUST00000153499
ENSMUSG00000016494	0.338135	0.0254976	Cd34	CD34 antigen [Source:MGI Symbol;Acc:MGI:88329]	protein_coding	ENSMUST00000016638,ENSMUST00000110815
ENSMUSG00000026547	0.313936	0.0458348	Tagln2	transgelin 2 [Source:MGI Symbol;Acc:MGI:1312985]	protein_coding	ENSMUST00000111228,ENSMUST00000111230,ENSMUST00000138296
ENSMUSG00000060802	0.30343	0.0362717	B2m	beta-2 microglobulin [Source:MGI Symbol;Acc:MGI:88127]	protein_coding	ENSMUST00000102476
ENSMUSG00000027499	-0.345928	0.033169	Pkia	protein kinase inhibitor, alpha [Source:MGI Symbol;Acc:MGI:104747]	protein_coding	ENSMUST00000028999
ENSMUSG00000049932	-0.405793	0.0297412	H2afx	H2A histone family, member X [Source:MGI Symbol;Acc:MGI:102688]	protein_coding	ENSMUST00000052686
ENSMUSG00000047414	-0.419635	0.0242166	Flrt2	fibronectin leucine rich transmembrane protein 2 [Source:MGI Symbol;Acc:MGI:3603594]	protein_coding	ENSMUST00000057324,ENSMUST00000110117
ENSMUSG00000024975	-0.459184	0.0497363	Pdcd4	programmed cell death 4 [Source:MGI Symbol;Acc:MGI:107490]	protein_coding	ENSMUST00000025931,ENSMUST00000074371,ENSMUST00000165617
ENSMUSG00000002416	-0.489525	0.0413106	Ndufb2	NADH dehydrogenase (ubiquinone) 1 beta subcomplex, 2 [Source:MGI Symbol;Acc:MGI:1915448]	protein_coding	ENSMUST00000002490,ENSMUST00000119379,ENSMUST00000128064,ENSMUST00000135239,ENSMUST00000135671,ENSMUST00000146793
ENSMUSG00000022490	-0.513949	0.0413106	Ppp1r1a	protein phosphatase 1, regulatory (inhibitor) subunit 1A [Source:MGI Symbol;Acc:MGI:1889595]	protein_coding	ENSMUST00000023133
ENSMUSG00000032179	-0.562675	0.0443135	Bmp5	bone morphogenetic protein 5 [Source:MGI Symbol;Acc:MGI:88181]	protein_coding	ENSMUST00000012281,ENSMUST00000137213
ENSMUSG00000057880	-0.569603	0.0265766	Abat	4-aminobutyrate aminotransferase [Source:MGI Symbol;Acc:MGI:2443582]	protein_coding	ENSMUST00000065987,ENSMUST00000115838,ENSMUST00000115839,ENSMUST00000128459,ENSMUST00000138987,ENSMUST00000140795,ENSMUST00000144444
ENSMUSG00000033214	-0.571402	0.0412582	Slitrk5	SLIT and NTRK-like family, member 5 [Source:MGI Symbol;Acc:MGI:2679448]	protein_coding	ENSMUST00000042767
ENSMUSG00000034858	-0.613392	0.0378151	Fam214a	family with sequence similarity 214, member A [Source:MGI Symbol;Acc:MGI:2387648]	protein_coding	ENSMUST00000081746,ENSMUST00000170846
ENSMUSG00000054477	-0.613639	0.0261234	Kcnn2	potassium intermediate/small conductance calcium-activated channel, subfamily N, member 2 [Source:MGI Symbol;Acc:MGI:2153182]	protein_coding	ENSMUST00000066890,ENSMUST00000167895,ENSMUST00000169783,ENSMUST00000183623,ENSMUST00000183850,ENSMUST00000183897,ENSMUST00000184101
ENSMUSG00000026163	-0.659952	0.0196918	Sphkap	SPHK1 interactor, AKAP domain containing [Source:MGI Symbol;Acc:MGI:1924879]	protein_coding	ENSMUST00000053075,ENSMUST00000159078,ENSMUST00000160237,ENSMUST00000160567,ENSMUST00000160953
ENSMUSG00000082035	-0.661933	0.0378151	Rpl17-ps8	ribosomal protein L17, pseudogene 8 [Source:MGI Symbol;Acc:MGI:3802129]	pseudogene	ENSMUST00000118924
ENSMUSG00000020308	-0.682774	0.0179118	Tpgs1	tubulin polyglutamylase complex subunit 1 [Source:MGI Symbol;Acc:MGI:106618]	protein_coding	ENSMUST00000020552
ENSMUSG00000048644	-0.696368	0.0231307	Ctxn1	cortexin 1 [Source:MGI Symbol;Acc:MGI:88566]	protein_coding	ENSMUST00000053252
ENSMUSG00000050840	-0.726176	0.0334093	Cdh20	cadherin 20 [Source:MGI Symbol;Acc:MGI:1346069]	protein_coding	ENSMUST00000062528
ENSMUSG00000024411	-0.751359	0.0142012	Aqp4	aquaporin 4 [Source:MGI Symbol;Acc:MGI:107387]	protein_coding	ENSMUST00000079081
ENSMUSG00000083626	-0.779203	0.020174	Gm4459	predicted gene 4459 [Source:MGI Symbol;Acc:MGI:3782643]	pseudogene	ENSMUST00000118750
ENSMUSG00000022487	-0.9199	0.0476213	Gtsf1	gametocyte specific factor 1 [Source:MGI Symbol;Acc:MGI:1921424]	protein_coding	ENSMUST00000023129,ENSMUST00000123724,ENSMUST00000129837,ENSMUST00000136480,ENSMUST00000141364,ENSMUST00000146675,ENSMUST00000146736,ENSMUST00000147389,ENSMUST00000153930
ENSMUSG00000035606	-0.936808	0.0443135	Ky	kyphoscoliosis peptidase [Source:MGI Symbol;Acc:MGI:96709]	protein_coding	ENSMUST00000039390,ENSMUST00000190609
ENSMUSG00000078815	-1.1357	0.0216265	Cacng6	calcium channel, voltage-dependent, gamma subunit 6 [Source:MGI Symbol;Acc:MGI:1859168]	protein_coding	ENSMUST00000108647,ENSMUST00000183200
ENSMUSG00000027314	-1.23507	0.0264805	Dll4	delta-like 4 (Drosophila) [Source:MGI Symbol;Acc:MGI:1859388]	protein_coding	ENSMUST00000102517,ENSMUST00000127102
ENSMUSG00000066270	-5.21857	0.0412604	Gm10157	predicted gene 10157 [Source:MGI Symbol;Acc:MGI:3642264]	pseudogene	ENSMUST00000139408
ENSMUSG00000082016	-8.59636	0.0188544	Pgam1-ps2	phosphoglycerate mutase 1, pseudogene 2 [Source:MGI Symbol;Acc:MGI:3645709]	pseudogene	ENSMUST00000117129
ENSMUSG00000060419	-9.71907	0.0142012	Rps16-ps2	ribosomal protein S16, pseudogene 2 [Source:MGI Symbol;Acc:MGI:3704259]	pseudogene	ENSMUST00000140155
