# Supplementary material for: Coronary arterial development is regulated by a Dll4-Jag1-EphrinB2 signaling cascade
Source: eLife. 2019 Dec 4;8:e49977. doi: 10.7554/eLife.49977 (PMC6917494; doi:10.7554/eLife.49977)
Supplement: Supplementary file 3. — Upstream Regulator analyses results, in sheets labelled as ‘UpRegTransc’, are restricted to molecules of type ‘transcription regulator’. For each predicted upstream regulator, tables describe expression log ratio (when available), predicted activation state, activation z-score, enrichment p_value and the collection of differentially expressed genes that are targets of the regulator. Downstream Effect analyses results, in sheets labelled as ‘CardSystDevFunc’, are restricted to functions of category ‘Cardiovascular System Development and Function’. For each functional term, tables describe enrichment p value, predicted activation state, activation z-score and the collection of differentially expressed genes associated to that particular function. Positive and negative z-score values suggest activation or inhibition of the corresponding upstream regulator or function in the mutant or control condition, respectively; abs(z-score)>2 and p value < 0.05 are considered significant. [file elife-49977-supp3.xlsx]

## Sheet: JAG1NF_UpRegTransc
Upstream Regulator	Exp Log Ratio	Molecule Type	Predicted Activation State	Activation z-score	p-value of overlap	Target molecules in dataset
HIF1A	0.655	transcription regulator	Activated	3.533	2.55e-14	ACTA2,ALDOC,ASNS,BNIP3,BNIP3L,CDKN1B,Cdkn1c,CEMIP,COX4I2,CTPS1,EGLN3,ERO1A,HMOX1,HSPB1,LOXL2,NRN1,P4HA1,PDK1,PLOD2,RORC,SLC2A3,SMAD7,VEGFA,WT1
STAT4	-0.297	transcription regulator	Activated	3.835	9.41e-10	ALDOC,BCL2L11,C3,CCNI,CDKN1B,ERO1A,FZD7,MGARP,Mt1,PDK1,PLOD2,PYGL,RORA,SLC2A3,VEGFA
SRF	-0.127	transcription regulator		-0.657	1.99e-07	A2M,ACTA2,APOLD1,BCL2L11,CORIN,GSN,MPPED2,MSTN,MYL2,MYL3,NET1,PDE2A,PKHD1L1,TCAP,WT1
ATF4	0.271	transcription regulator	Activated	2.891	3.03e-07	ASNS,CDKN1B,CPOX,DDR2,ERO1A,JAG1,LGALS3,SLC38A2,SLC7A3,VEGFA
SMAD3	0.117	transcription regulator		1.344	5.32e-07	ACTA2,BCL2L11,BMP6,C3,CCNE1,HMOX1,JAG1,LPAR1,MSTN,NET1,SMAD7,VEGFA
STAT3	0.183	transcription regulator		1.142	6.32e-07	A2M,ACTA2,BCL2L11,CCNE1,CDKN1B,DLL1,GBP6,HLA-A,HMOX1,JAG1,LRP2,LYZ,Mt1,NAMPT,RORA,RORC,SMAD9,VEGFA
FOXO3	0.468	transcription regulator	Activated	2.234	2.61e-06	BCL2L11,BNIP3,BNIP3L,CAD,CDKN1B,JAG1,MSTN,Mt1,Mt2,NAMPT
HTT	-0.022	transcription regulator		0.068	3.11e-06	ACTA2,ALDOC,BCL2L11,COX4I2,COX6B2,CPNE5,CYCS,DKK3,DLL1,GRIA1,GSN,KCNJ2,Mt1,MYL2,Nefm,NR2F1,PPP1R1A,SLC12A2,TAGLN3,TNNT3
EPAS1	0.004	transcription regulator	Activated	2.541	7.95e-06	ALDOC,BNIP3,CEMIP,EGLN3,LOXL2,MYOM2,NRN1,PLOD2,SLC2A3,VEGFA
TP53	-0.089	transcription regulator		-1.562	1.07e-05	A2M,ACTA2,ASNS,Atp5k,BCL2L11,BIK,BNIP3,CCNE1,CDKN1B,CPOX,DKK3,FABP3,FABP4,GSN,HMOX1,HSPB1,LGALS3,LYZ,Mt2,NAMPT,NDUFA4L2,NME1,NR2F1,P4HA1,PDK1,PLOD2,SMAD7,STARD4,VEGFA
SMAD7	0.445	transcription regulator		-0.267	1.49e-05	ACTA2,BCL2L11,CCNE1,CDKN1B,HMOX1,NET1,SMAD7,VEGFA
PPARGC1A	0.416	transcription regulator		0.259	2.27e-05	BNIP3,C3,CAV3,CD36,COMP,CYCS,FABP3,FABP4,INSIG1,VEGFA
RB1	0.193	transcription regulator		0.808	2.6e-05	APPL2,Atp5k,BCL2L11,BNIP3,CCNE1,CDKN1B,Cdkn1c,FABP4,MYOM2,Nefm,NME1,TCAP,VEGFA
RBPJ	0.275	transcription regulator		-1.387	2.72e-05	CDKN1B,Cdkn1c,DLL1,FGF11,JAG1,MSTN,RORC,VEGFA
RELA	-0.07	transcription regulator		1.862	3.23e-05	A2M,ACTA2,BCL2L11,BNIP3L,C3,CDKN1B,HMOX1,KCNT2,NAMPT,RORC,SMAD7,VEGFA,WT1
WT1	0.402	transcription regulator		-0.366	3.44e-05	ASNS,CCNE1,CHAF1B,LGALS3,MSLN,NME1,PDE8A,SLC2A3,VEGFA,WT1
FOXO4	0.032	transcription regulator		0.883	4.2e-05	BNIP3,CDKN1B,JAG1,NAMPT,VEGFA
RUNX2		transcription regulator	Activated	2.609	5.11e-05	ACTA2,CCNE1,CDKN1B,LGALS3,SOST,UGCG,VEGFA
SREBF1	0.052	transcription regulator	Activated	2.449	5.84e-05	AK4,ALDOC,CAMK1D,FABP4,HMOX1,INSIG1,LGALS3,STARD4,VEGFA
FOS	1.204	transcription regulator		0.186	7.22e-05	A2M,BCL2L11,CCNE1,CYCS,FABP4,FRZB,HMOX1,LGALS3,MSLN,Mt2,NET1,RAB11FIP1,SMAD7,UGCG,VEGFA
JUN	-0.024	transcription regulator		0.488	9.03e-05	A2M,ASNS,BCL2L11,CDKN1B,CYCS,FABP4,FRZB,HMOX1,LGALS3,LPAR1,SLC38A2,SMAD7,VEGFA
SMARCB1	-0.117	transcription regulator			0.000101	A2M,BCL2L11,BNIP3,BNIP3L,CCNE1,FABP4,FZD7,GSN
NFKBIA	0.114	transcription regulator		0.786	0.000109	A2M,BNIP3,C3,Cdkn1c,ERO1A,FZD7,HLA-A,HMOX1,Mt1,Mt2,NOCT,SLC12A2,VEGFA
PPARGC1B	0.328	transcription regulator		1.387	0.000122	C3,CYCS,EGLN3,ERO1A,VEGFA
KDM5A	0.326	transcription regulator		0.114	0.000138	Atp5k,CCNE1,CDKN1B,HMOX1,MYOM2,NME1,TCAP
EGR1	0.867	transcription regulator		0.647	0.000163	ACTA2,BCL2L11,Cdkn1c,GRIA1,HMOX1,LYZ,SLC12A2,VEGFA
SOX5	0.197	transcription regulator			0.00017	BMP6,CDKN1B,RORC
NOTCH1	0.002	transcription regulator		-0.84	0.000171	ACTA2,CAD,CCNE1,CDKN1B,DLL1,HEYL,JAG1,RORC,SOST
MEF2C	0.123	transcription regulator		1.206	0.000176	FRZB,KCNJ2,MYL2,MYOM2,SOST,SRPK3
CDKN2A		transcription regulator		1.014	0.000179	A2M,APPL2,BCL2L11,C3,CCNE1,CCNI,CDKN1B,LGALS3,MYL2,VEGFA
KLF6	0.237	transcription regulator		-0.106	0.000247	BCL2L11,CDKN1B,MSLN,NR2F1,VEGFA
STAT1	-0.047	transcription regulator	Activated	2.208	0.000264	A2M,BCL2L11,C3,CCNE1,CDKN1B,EGLN3,GBP6,PCDH17,RORC,SMAD7
SP1	0.158	transcription regulator		0.759	0.000276	ACTA2,ASNS,BNIP3L,CAD,CDKN1B,GRIA1,HMOX1,Mt1,PDK1,SLC25A5,SLC2A3,SMAD7,UGCG,VEGFA
MYC	0.003	transcription regulator		-1.57	0.000302	Arf2,ASNS,CAD,CCNE1,CDKN1B,CYCS,FABP4,FRZB,HLA-A,HMOX1,HSPB1,LYZ,Mt1,Mt2,NME1,NOCT,PDK1,SLC25A5,SLC2A3,TNNT3,VEGFA
YY1	0.11	transcription regulator			0.000348	ACTA2,BCL2L11,BIK,BMP6,Cdkn1c,HMOX1,LRP2,VEGFA,WT1
ATOH1		transcription regulator			0.000554	CDKN1B,Cdkn1c,DLL1
SMAD4	0.214	transcription regulator		0.57	0.000562	CCNE1,CDKN1B,HMOX1,JAG1,LPAR1,NAMPT,SMAD7,VEGFA
RUNX1	0.447	transcription regulator		1.698	0.000635	BCL2L11,CDKN1B,Cdkn1c,Mt1,RORC,UGCG,VEGFA
BMI1		transcription regulator			0.000661	BNIP3,CCNE1,CDKN1B,P4HA1
ID2	0.068	transcription regulator		1.715	0.00073	ACTA2,BCL2L11,CCNE1,Cdkn1c,Nefm,RORA,SMAD7
STAT5A	0.108	transcription regulator		-0.351	0.000744	A2M,CCNE1,CDKN1B,CEMIP,EGLN3,FABP4,MYL2,RORA,SLC2A3
TFE3	0.047	transcription regulator			0.000751	CCNE1,SMAD7,WT1
CEBPB	0.58	transcription regulator		0.438	0.000763	ACTA2,ASNS,C3,CCNE1,CDKN1B,EPHA7,FABP4,HLA-A,RORA,SLC12A2,SLC38A2
SMAD2	0.197	transcription regulator		1.706	0.000766	ACTA2,BCL2L11,HMOX1,NET1,SMAD7
VHL	0.139	transcription regulator		-1.984	0.0008	BNIP3,CDKN1B,CFL1,EGLN3,HMOX1,VEGFA
FOXO1	0.05	transcription regulator	Activated	2.195	0.000833	A2M,BCL2L11,CDKN1B,Cdkn1c,CYCS,FABP4,HMOX1,JAG1,MYL3,NAMPT
MAX	0.042	transcription regulator		0	0.0009	CAD,CDKN1B,CYCS,PDK1,SLC2A3
SIRT1	0.022	transcription regulator		0.655	0.00112	BNIP3,CD36,CDKN1B,ERO1A,FABP4,HMOX1,NLGN2,SOST
EP300	0.16	transcription regulator	Activated	2.121	0.00113	CAD,CAV3,CCNE1,CD36,CDKN1B,FABP4,HMOX1,RORC,SMAD7,SMOC1,VEGFA
RUNX3		transcription regulator			0.00113	BCL2L11,JAG1,UGCG,WT1
FOXP3		transcription regulator			0.00141	BCL2L11,HLA-A,NRN1,SMAD7,VEGFA
FOXA2		transcription regulator			0.00143	A2M,ACTA2,C3,LYZ,Mt1,RORA,RORC
LMX1A	1.53	transcription regulator			0.00151	CDKN1B,CORIN
NOTCH4	0.094	transcription regulator			0.00159	ACTA2,CDKN1B,Cdkn1c
MED14	0.029	transcription regulator			0.002	CD36,FABP4
TP73		transcription regulator		-1.021	0.00232	ACTA2,BCL2L11,C3,CDKN1B,Cdkn1c,JAG1,LYZ,Serpinb6b,VEGFA
EOMES		transcription regulator		0	0.00242	C3orf58,CEMIP,Nefm,SV2B
CTNNB1	0.027	transcription regulator		0.917	0.0027	ACTA2,BCL2L11,CACNA1G,CCNE1,CDKN1B,Cdkn1c,FABP4,FZD7,LGALS3,SLC12A2,SMAD7,UGCG,VEGFA,WT1
SREBF2	0.069	transcription regulator		1.964	0.00316	ALDOC,CAMK1D,INSIG1,STARD4
TCF3	-0.147	transcription regulator			0.00316	BCL2L11,BIK,CCNE1,GRIA1,RORA,RORC,SLC12A2
MTF1	-0.02	transcription regulator			0.00319	Mt1,SLC30A1
ATF3	0.079	transcription regulator		-0.106	0.00333	ASNS,CCNE1,GSN,HSPB1
ARNT	0.231	transcription regulator	Activated	2.2	0.00337	ALDOC,BNIP3,ERO1A,SLC2A3,VEGFA
CEBPA	0.48	transcription regulator		0.255	0.00349	A2M,ASNS,BIK,C3,CYCS,EPHA7,FABP4,HMOX1,PLOD2,RORA
MECP2	0.121	transcription regulator			0.00362	GRIA1,Mt1,Nefm,SLC2A3,VEGFA
RBL1	0.168	transcription regulator			0.00368	BCL2L11,CCNE1,CDKN1B,Cdkn1c
LMX1B		transcription regulator			0.00387	CDKN1B,CORIN
CCNT1	0.101	transcription regulator			0.00387	CAD,CDKN1B
NKX2-5	-0.144	transcription regulator			0.00428	BMP10,MOV10L1,MYL2
NKX2-1		transcription regulator			0.00444	HLA-A,LRP2,LYZ,Serpinb6b,SMAD7,VEGFA
USF1	-0.095	transcription regulator			0.00446	CAD,Mt1,P4HA1,RORC
ID3	-0.043	transcription regulator		1.715	0.00456	BCL2L11,CCNE1,CDKN1B,Cdkn1c,RORA,SMAD7
MEN1	-0.151	transcription regulator			0.0046	CDKN1B,FABP4,RORC
PML	0.066	transcription regulator		-1.432	0.00463	CCNE1,CFL1,HMOX1,HSPB1,LYZ
SMARCA4	-0.118	transcription regulator		-0.326	0.00476	A2M,ACTA2,ASNS,BNIP3L,CDKN1B,FABP4,KCNJ2,LGALS3,LOXL2,Mt1,PDK1,TNNT3
SMAD1	0.029	transcription regulator			0.00494	ACTA2,SMAD7,VEGFA
HDAC3	-0.035	transcription regulator			0.00511	CD36,CDKN1B,HMOX1,SMAD7
HDAC1	-0.073	transcription regulator		-0.152	0.00553	CCNE1,CDKN1B,FABP4,Mt1,Mt2,Nefm,RORC
TAL1	0.279	transcription regulator			0.00578	C3,CCNE1,ERG,HLA-A,MSLN,SLC2A3
TFCP2	0.01	transcription regulator			0.0063	A2M,WT1
POU5F1		transcription regulator		0.798	0.00645	B3GNT7,BCL2L11,BIK,BNIP3,BNIP3L,FRZB,SMAD7,VEGFA
BACH2	0.168	transcription regulator			0.00646	EGLN3,HMOX1,RORC
EHF		transcription regulator		0	0.00714	CDKN1B,HMOX1,JAG1,VEGFA
CBX4	0.075	transcription regulator			0.00821	CCNE1,VEGFA
NRF1	-0.054	transcription regulator			0.00823	CYCS,HMOX1,Mt1
FOXC2	0.063	transcription regulator			0.00823	CDKN1B,DLL1,FABP4
Esrra	-0.085	transcription regulator			0.00833	ALDOC,CYCS,PDK1,PYGL
FOXA1		transcription regulator			0.00881	ACTA2,JAG1,RORA,RORC,SLC12A2
NOTCH3	0.09	transcription regulator			0.00921	ACTA2,CDKN1B,Cdkn1c
TGFB1I1	-0.251	transcription regulator			0.00925	CD36,CDKN1B
RFX1	0.029	transcription regulator			0.00925	MAP1A,SLC1A1
DNAJB6	0.083	transcription regulator			0.00925	CCNE1,CDKN1B
BTG2	0.148	transcription regulator			0.00925	CCNE1,HMOX1
MYCN	-0.163	transcription regulator		-1.706	0.00938	CAD,CDKN1B,DKK3,HLA-A,NME1,PDK1,SLC38A2
EGR2		transcription regulator	Activated	2.219	0.00984	BCL2L11,BNIP3L,Nefm,SLC12A2,VEGFA
CEBPD	-0.032	transcription regulator			0.00999	ASNS,C3,CDKN1B,FABP4
CEBPE		transcription regulator			0.0103	CCNE1,CDKN1B,LYZ
COPS5	-0.069	transcription regulator			0.0104	CCNE1,CDKN1B
BARX2		transcription regulator			0.0104	ACTA2,MYL3
SMARCA2	0.134	transcription regulator			0.0114	CCNE1,CD36,NME1
PLAG1	0.497	transcription regulator			0.0119	SRPK3,TNNT3,VEGFA
NCOA1	0.125	transcription regulator			0.0127	C3,FABP4,LYZ,NOCT
MAFK	0.24	transcription regulator			0.0127	EGLN3,HMOX1
TFAM	-0.085	transcription regulator			0.0127	FABP3,FABP4
DDIT3	1.466	transcription regulator			0.0138	BCL2L11,ERO1A,HMOX1
SRA1		transcription regulator			0.014	FABP4,SLC2A3
FOXC1	-0.026	transcription regulator			0.014	BCL2L11,DLL1
USF2	0.031	transcription regulator			0.0144	HMOX1,P4HA1,RORC
TFAP2C		transcription regulator			0.0151	DYRK2,JAG1,MAGI3
NFIX	0.134	transcription regulator			0.0153	FABP4,SLC25A5
SKI	0.056	transcription regulator			0.0153	ACTA2,SMAD7
HEY1	0.102	transcription regulator			0.0153	ACTA2,Cdkn1c
BRCA1	0.165	transcription regulator		-0.077	0.0169	CCNE1,CDKN1B,HMOX1,HSPB1,VEGFA
SIX6		transcription regulator			0.0172	CDKN1B
ETV7		transcription regulator			0.0172	BMP6
ARID5B	0.218	transcription regulator			0.0172	ACTA2
SALL1	-0.165	transcription regulator			0.0172	VEGFA
CUX2	-0.137	transcription regulator			0.0172	DLL1
TARDBP	-0.01	transcription regulator			0.0181	BCL2L11,CD36
NEUROG1		transcription regulator			0.0187	C3,CEMIP,FABP3
HAND1	-0.163	transcription regulator			0.0195	FABP4,SMPX
TBX5	0.114	transcription regulator			0.0195	IRX4,KCNJ2,MYL2
BATF	-0.308	transcription regulator			0.0195	RORA,RORC
NFKB1	0.092	transcription regulator		1.067	0.0199	A2M,HMOX1,JAG1,KCNT2,VEGFA,WT1
CTCF	0.044	transcription regulator			0.0202	CDKN1B,LYZ,RORC
SOX4	0.09	transcription regulator		1.342	0.0206	KDM7A,LYZ,Mt1,PYGL,SLC7A3
VAV1	0.305	transcription regulator			0.021	CDKN1B,VEGFA
SP4	0.46	transcription regulator			0.021	CDKN1B,VEGFA
PROX1	0.276	transcription regulator			0.021	CCNE1,TNNT3
JUNB	0.887	transcription regulator			0.0221	C3,CDKN1B,HMOX1,LPAR1
FHL2	-0.018	transcription regulator			0.0226	ACTA2,BCL2L11
MYOD1		transcription regulator		0.314	0.0229	ACTA2,CCNE1,SLC12A2,SMAD7,TNNT3
FBXW7	0.04	transcription regulator			0.0242	CD36,FABP4
PAX7		transcription regulator			0.0244	CAMK1D,DHX40,MSLN
LPXN		transcription regulator			0.0257	ACTA2
TBX6		transcription regulator			0.0257	DLL1
PSMC5	-0.273	transcription regulator			0.0257	CDKN1B
PURB	-0.027	transcription regulator			0.0257	ACTA2
ARID3A	0.129	transcription regulator			0.0257	CCNE1
VSX2		transcription regulator			0.0257	CDKN1B
TCEB3	0.025	transcription regulator			0.0257	CCNE1
HDAC2	-0.052	transcription regulator			0.0264	CDKN1B,COMP,Mt2,RORC
HEY2	0.363	transcription regulator			0.0275	ACTA2,KCNJ2
NFATC4	0.161	transcription regulator			0.0275	CDKN1B,FABP4
CCND1	-0.284	transcription regulator			0.0287	CCNE1,CDKN1B,FZD7,KLHL24,SLC4A4,STARD4
ATN1	-0.002	transcription regulator			0.029	GSN,Nefm,NR2F1,TAGLN3
YAP1	0.163	transcription regulator			0.029	ACTA2,BCL2L11,MSLN
NFE2L1	-0.061	transcription regulator			0.0292	BIK,HMOX1
SOX3	-0.193	transcription regulator			0.03	DLL1,FRZB,VEGFA
PRDM5	0.065	transcription regulator			0.031	CEMIP,DKK3,MYOM2
MYOCD	0.015	transcription regulator			0.031	ACTA2,MYL2,VEGFA
ARNT2	0.076	transcription regulator		0.447	0.0334	DLL1,HLA-A,MRPL37,SLC2A3,VEGFA
ZIC1		transcription regulator			0.0341	CDKN1B
TBX20	0.177	transcription regulator			0.0341	BMP10
PLAGL2	-0.114	transcription regulator			0.0341	BNIP3
ZKSCAN3	-0.027	transcription regulator			0.0341	VEGFA
TEAD1	0.218	transcription regulator			0.0347	ACTA2,MSLN
NOTCH2	0.058	transcription regulator			0.0347	ACTA2,CDKN1B
SPIB		transcription regulator			0.0362	BMP6,DLL1,NET1
TEAD4	-0.039	transcription regulator			0.0366	SLC2A3,VEGFA
SP3	0.221	transcription regulator			0.0378	ACTA2,ASNS,CDKN1B,SLC2A3,VEGFA
TP63		transcription regulator	Inhibited	-2.117	0.0382	BCL2L11,CAD,CCNE1,CDKN1B,DLL1,JAG1,VEGFA
PCGF2	0.012	transcription regulator			0.0385	CCNE1,JAG1
TWIST1	0.181	transcription regulator		1	0.0404	ACTA2,DKK3,GSN,VEGFA
KLF2	-0.193	transcription regulator			0.0404	CD36,DLL1,FABP4,PLOD2
COMMD3-BMI1	0.117	transcription regulator			0.0405	CCNE1,HOXA3
EZH2	-0.045	transcription regulator		0.44	0.041	BCL2L11,C3,CDKN1B,CEMIP,FRZB,VEGFA
FOXK2	-0.097	transcription regulator			0.0424	CDKN1B
NACA	-0.134	transcription regulator			0.0424	SOST
DNMT3L		transcription regulator			0.0424	Cdkn1c
BRD8	0.095	transcription regulator			0.0424	FABP4
GTF2H4	-0.011	transcription regulator			0.0424	CAD
MYCL		transcription regulator			0.0424	CAD
Foxe3		transcription regulator			0.0424	Cdkn1c
RFXANK	-0.069	transcription regulator			0.0424	HLA-A
FOXA3		transcription regulator			0.0425	COX4I2,CYCS
CARM1	-0.039	transcription regulator			0.0425	C3,CCNE1
HSF2	0.007	transcription regulator			0.0425	HSPB1,PSMC4
POU4F2		transcription regulator			0.0425	IRX4,WT1
TFEB	-0.209	transcription regulator			0.0446	VEGFA,WT1
TCF7		transcription regulator			0.0466	RORA,RORC
GATA1	0.949	transcription regulator	Activated	2.219	0.0467	BCL2L11,BMP6,CD36,CDKN1B,LYZ
CREB1	0.221	transcription regulator		0.895	0.0471	AK4,APOLD1,BNIP3,CAMK1D,GRIA1,HLA-A,HMOX1,SLC2A3,VEGFA
PAX5		transcription regulator			0.0488	BIK,CDKN1B
GFI1		transcription regulator			0.0492	CDKN1B,LPAR1,LYZ

## Sheet: Dll4NF_UpRegTransc
Upstream Regulator	Expr Log Ratio	Molecule Type	Predicted Activation State	Activation z-score	p-value of overlap	Target molecules in dataset	Target molecules in dataset
HIF1A	-0.38	transcription regulator	Activated	3.226	1.24e-16	ADM,BGN,BHLHE40,BNIP3,Ccl2,Cdkn1c,DLL4,EGLN3,ENO2,ERO1A,FZD2,HIF1A,HILPDA,HK2,HMOX1,MAFF,NDRG1,NOTCH1,P4HA1,P4HA2,PFKFB3,PLOD2,SLC29A1,SLC2A3,SMAD7,STAT3,STC2,TMEM45A,TTN,VEGFA,WT1	ADM,BGN,BHLHE40,BNIP3,Ccl2,Cdkn1c,DLL4,EGLN3,ENO2,ERO1A,FZD2,HIF1A,HILPDA,HK2,HMOX1,MAFF,NDRG1,NOTCH1,P4HA1,P4HA2,PFKFB3,PLOD2,SLC29A1,SLC2A3,SMAD7,STAT3,STC2,TMEM45A,TTN,VEGFA,WT1
EPAS1	-0.119	transcription regulator	Activated	3.309	5.18e-15	ADM,BHLHE40,BNIP3,CA12,CEBPB,DDIT3,EGLN3,ENO2,HIF1A,HILPDA,MAFF,NAMPT,NDRG1,NOTCH1,PFKFB3,PLOD2,SLC29A1,SLC2A3,STC2,TMEM45A,TNFAIP3,VEGFA	ADM,BHLHE40,BNIP3,CA12,CEBPB,DDIT3,EGLN3,ENO2,HIF1A,HILPDA,MAFF,NAMPT,NDRG1,NOTCH1,PFKFB3,PLOD2,SLC29A1,SLC2A3,STC2,TMEM45A,TNFAIP3,VEGFA
STAT4	0.459	transcription regulator	Activated	4.536	4e-13	ARMCX1,BCL3,Cyp2d22,ENO2,ERO1A,GTF2E2,H3F3A/H3F3B,HILPDA,IER3,MGARP,Mt1,NDRG1,P4HA2,PER1,PLOD2,RORA,RRAD,SELENBP1,SLC2A3,STC2,VEGFA	ARMCX1,BCL3,Cyp2d22,ENO2,ERO1A,GTF2E2,H3F3A/H3F3B,HILPDA,IER3,MGARP,Mt1,NDRG1,P4HA2,PER1,PLOD2,RORA,RRAD,SELENBP1,SLC2A3,STC2,VEGFA
TP53	0.158	transcription regulator		0.56	2.22e-09	A2M,ABCC1,BCL3,BHLHE40,BNIP3,CAMK2N1,Ccl2,CCND2,CCNG2,CEBPB,CNN1,DBP,DDIT3,DDIT4,DLC1,FAT1,FDFT1,HIF1A,HK2,HMOX1,ICAM1,IER3,IRF7,IRF9,MT-ND5,Mt2,NAMPT,NDRG1,NOTCH1,P4HA1,PALLD,PDE2A,PDE4B,PFKFB3,PIK3R3,PLOD2,PSME3,PTPN11,RASSF2,RRAD,SGK1,SMAD7,SOCS2,STARD4,TGFBR1,UBE2T,VEGFA	A2M,ABCC1,BCL3,BHLHE40,BNIP3,CAMK2N1,Ccl2,CCND2,CCNG2,CEBPB,CNN1,DBP,DDIT3,DDIT4,DLC1,FAT1,FDFT1,HIF1A,HK2,HMOX1,ICAM1,IER3,IRF7,IRF9,MT-ND5,Mt2,NAMPT,NDRG1,NOTCH1,P4HA1,PALLD,PDE2A,PDE4B,PFKFB3,PIK3R3,PLOD2,PSME3,PTPN11,RASSF2,RRAD,SGK1,SMAD7,SOCS2,STARD4,TGFBR1,UBE2T,VEGFA
FOXO4	-0.003	transcription regulator	Activated	2.607	2.98e-09	BNIP3,CCND2,CCNG2,FDFT1,HIF1A,IER3,NAMPT,SGK1,VEGFA	BNIP3,CCND2,CCNG2,FDFT1,HIF1A,IER3,NAMPT,SGK1,VEGFA
MYC	0.105	transcription regulator		0.431	3.94e-09	ABCC1,ACTA1,ADM,BIN1,C12orf49,CAMK2N1,CCND2,CCNG2,CTSV,DDIT3,DDIT4,EZH1,FABP5,H3F3A/H3F3B,HIF1A,HK2,HMOX1,ICAM1,IER3,IRF7,IRF9,MAT2A,Mt1,Mt2,NDRG1,ODC1,PFKFB3,RBP1,RPL23,RPL30,SGK1,SLC25A19,SLC2A3,SLC3A2,SOX17,TLN1,TXNRD1,VEGFA	ABCC1,ACTA1,ADM,BIN1,C12orf49,CAMK2N1,CCND2,CCNG2,CTSV,DDIT3,DDIT4,EZH1,FABP5,H3F3A/H3F3B,HIF1A,HK2,HMOX1,ICAM1,IER3,IRF7,IRF9,MAT2A,Mt1,Mt2,NDRG1,ODC1,PFKFB3,RBP1,RPL23,RPL30,SGK1,SLC25A19,SLC2A3,SLC3A2,SOX17,TLN1,TXNRD1,VEGFA
STAT3	0.492	transcription regulator		0.976	8.92e-09	A2M,ADM,BCL3,CCND2,CEBPB,DDIT3,DLL1,GBP6,HIF1A,HK2,HMOX1,ICAM1,IRF7,IRF9,Mt1,NAMPT,NDRG1,NEURL3,NOTCH1,RORA,SGK1,SLC39A10,STAT3,STC2,VEGFA	A2M,ADM,BCL3,CCND2,CEBPB,DDIT3,DLL1,GBP6,HIF1A,HK2,HMOX1,ICAM1,IRF7,IRF9,Mt1,NAMPT,NDRG1,NEURL3,NOTCH1,RORA,SGK1,SLC39A10,STAT3,STC2,VEGFA
VHL	0.064	transcription regulator		-1.4	4.89e-08	BHLHE40,BNIP3,CA12,CNN1,EGLN3,ENO2,FLCN,HIF1A,HMOX1,IER3,PFKFB3,VEGFA	BHLHE40,BNIP3,CA12,CNN1,EGLN3,ENO2,FLCN,HIF1A,HMOX1,IER3,PFKFB3,VEGFA
NFKBIA	0.26	transcription regulator	Activated	3.056	8.63e-08	A2M,BCL3,BNIP3,Ccl2,CCND2,Cdkn1c,CEBPB,DDIT3,ERO1A,HIF1A,HK2,HMOX1,ICAM1,IER3,Mt1,Mt2,RBP1,SGK1,SLC1A2,TNFAIP3,VEGFA	A2M,BCL3,BNIP3,Ccl2,CCND2,Cdkn1c,CEBPB,DDIT3,ERO1A,HIF1A,HK2,HMOX1,ICAM1,IER3,Mt1,Mt2,RBP1,SGK1,SLC1A2,TNFAIP3,VEGFA
NUPR1	0.979	transcription regulator	Activated	3.173	2.59e-07	ADM,BNIP3,CAMK2N1,CEBPB,DDIT3,DIDO1,ENO2,FZD8,GATSL2,HILPDA,HK2,IRF2BP2,MAT2A,MEGF9,MMD,MRS2,NDRG1,NR1D1,P4HA2,PFKFB3,PPFIBP2,ST3GAL2	ADM,BNIP3,CAMK2N1,CEBPB,DDIT3,DIDO1,ENO2,FZD8,GATSL2,HILPDA,HK2,IRF2BP2,MAT2A,MEGF9,MMD,MRS2,NDRG1,NR1D1,P4HA2,PFKFB3,PPFIBP2,ST3GAL2
SIRT1	-0.046	transcription regulator		-0.344	2.91e-07	ATF7,BNIP3,Ccl2,CCND2,CCNG2,DBP,ERO1A,GABARAPL1,HIF1A,HMOX1,ICAM1,NLGN2,NR1D1,PER1,STAT3	ATF7,BNIP3,Ccl2,CCND2,CCNG2,DBP,ERO1A,GABARAPL1,HIF1A,HMOX1,ICAM1,NLGN2,NR1D1,PER1,STAT3
RELA	-0.048	transcription regulator	Activated	2.061	4.29e-07	A2M,BCL3,Ccl2,CEBPB,DDIT3,HIF1A,HMOX1,ICAM1,IER3,IRF7,MAT2A,NAMPT,NOTCH1,PDE4B,SLC1A2,SMAD7,TNFAIP3,VEGFA,WT1	A2M,BCL3,Ccl2,CEBPB,DDIT3,HIF1A,HMOX1,ICAM1,IER3,IRF7,MAT2A,NAMPT,NOTCH1,PDE4B,SLC1A2,SMAD7,TNFAIP3,VEGFA,WT1
EP300	-0.173	transcription regulator		0	1.23e-06	ACTA1,ADORA2A,CCNG2,DHRS3,FOSL2,GNG2,HMOX1,LGALS3BP,LIG4,MMD,NDRG1,NOTCH1,PPFIBP2,RBP1,SMAD7,TGFBR1,TIPARP,TNFAIP3,VEGFA	ACTA1,ADORA2A,CCNG2,DHRS3,FOSL2,GNG2,HMOX1,LGALS3BP,LIG4,MMD,NDRG1,NOTCH1,PPFIBP2,RBP1,SMAD7,TGFBR1,TIPARP,TNFAIP3,VEGFA
CREB1	0.027	transcription regulator	Activated	3.109	1.69e-06	ADM,ADORA2A,BHLHE40,BNIP3,CEBPB,CIART,CNN1,HMOX1,IER3,IRF7,MAT2A,NAB2,PER1,PIM3,SGK1,Sik1,SLC2A3,SOCS2,STAT3,TGFBR1,TIPARP,VEGFA	ADM,ADORA2A,BHLHE40,BNIP3,CEBPB,CIART,CNN1,HMOX1,IER3,IRF7,MAT2A,NAB2,PER1,PIM3,SGK1,Sik1,SLC2A3,SOCS2,STAT3,TGFBR1,TIPARP,VEGFA
SP1	-0.017	transcription regulator		0.743	4.2e-06	Ccl2,CCND2,CCNG2,CEBPB,DLC1,HIF1A,HK2,HMOX1,ICAM1,MAT2A,Mt1,NAB2,NDRG1,SGK1,SLC2A3,SMAD7,SMARCC1,TGFBR1,TNFAIP3,TXNRD1,VEGFA	Ccl2,CCND2,CCNG2,CEBPB,DLC1,HIF1A,HK2,HMOX1,ICAM1,MAT2A,Mt1,NAB2,NDRG1,SGK1,SLC2A3,SMAD7,SMARCC1,TGFBR1,TNFAIP3,TXNRD1,VEGFA
HTT	-0.037	transcription regulator	Inhibited	-2.174	5.72e-06	ACTA1,ADORA2A,BCL3,BHLHE40,CA12,CEBPB,DBP,DDIT3,DLL1,ENO2,FDFT1,HIF1A,KCNJ2,KCNK3,Mt1,NAB2,PDE4B,PER1,SEPHS1,SGK1,Sik1,SLC1A2,SOCS2,ST3GAL2	ACTA1,ADORA2A,BCL3,BHLHE40,CA12,CEBPB,DBP,DDIT3,DLL1,ENO2,FDFT1,HIF1A,KCNJ2,KCNK3,Mt1,NAB2,PDE4B,PER1,SEPHS1,SGK1,Sik1,SLC1A2,SOCS2,ST3GAL2
SREBF1	0.236	transcription regulator	Activated	2.766	7.05e-06	BHLHE40,Bhlhe41,CEBPB,FABP5,FDFT1,HK2,HMOX1,INSIG1,PIK3R3,STARD4,TTN,VEGFA	BHLHE40,Bhlhe41,CEBPB,FABP5,FDFT1,HK2,HMOX1,INSIG1,PIK3R3,STARD4,TTN,VEGFA
ID2	-0.185	transcription regulator		0.277	8.04e-06	BCL3,CCND2,CCNG2,Cdkn1c,CEBPB,HIF1A,ICAM1,NOTCH1,RORA,SMAD7,TUBA1A	BCL3,CCND2,CCNG2,Cdkn1c,CEBPB,HIF1A,ICAM1,NOTCH1,RORA,SMAD7,TUBA1A
ID3	-0.068	transcription regulator		1.939	1.18e-05	BCL3,CCND2,CCNG2,Cdkn1c,CEBPB,HIF1A,ICAM1,NOTCH1,RORA,SMAD7,SMARCC1	BCL3,CCND2,CCNG2,Cdkn1c,CEBPB,HIF1A,ICAM1,NOTCH1,RORA,SMAD7,SMARCC1
ARNT	0.1	transcription regulator		1.941	1.21e-05	ADM,BHLHE40,BNIP3,CCND2,ERO1A,HIF1A,HK2,SLC2A3,VEGFA	ADM,BHLHE40,BNIP3,CCND2,ERO1A,HIF1A,HK2,SLC2A3,VEGFA
EGR1	0.995	transcription regulator		1.466	1.24e-05	Ccl2,CCND2,Cdkn1c,HIF1A,HMOX1,ICAM1,NAB2,NDRG1,RRAD,SGK1,VEGFA	Ccl2,CCND2,Cdkn1c,HIF1A,HMOX1,ICAM1,NAB2,NDRG1,RRAD,SGK1,VEGFA
ECSIT	0.035	transcription regulator	Activated	2.177	1.64e-05	BCL3,HMOX1,IER3,IRF7,TNFAIP3	BCL3,HMOX1,IER3,IRF7,TNFAIP3
CREM	-0.053	transcription regulator	Activated	2.789	1.71e-05	BHLHE40,CCND2,CEBPB,CIART,NAB2,NOTCH1,PER1,Sik1,TIPARP,VEGFA	BHLHE40,CCND2,CEBPB,CIART,NAB2,NOTCH1,PER1,Sik1,TIPARP,VEGFA
ATF4	0.23	transcription regulator	Activated	2.762	1.81e-05	CEBPB,DDIT3,DDIT4,ERO1A,NDRG1,SLC38A3,SLC3A2,STAT3,STC2,VEGFA	CEBPB,DDIT3,DDIT4,ERO1A,NDRG1,SLC38A3,SLC3A2,STAT3,STC2,VEGFA
FOXO3	0.381	transcription regulator	Activated	3.251	1.87e-05	BNIP3,C8orf4,CCND2,CCNG2,CTSV,DDIT3,DDIT4,GABARAPL1,IER3,Mt1,Mt2,NAMPT,SGK1	BNIP3,C8orf4,CCND2,CCNG2,CTSV,DDIT3,DDIT4,GABARAPL1,IER3,Mt1,Mt2,NAMPT,SGK1
CBFB	-0.196	transcription regulator		-0.816	3.2e-05	ARL4C,ICAM1,LGALS3BP,MPO,SLC25A19,SOCS2,TGFBR1	ARL4C,ICAM1,LGALS3BP,MPO,SLC25A19,SOCS2,TGFBR1
ZBTB17	0	transcription regulator			3.88e-05	BHLHE40,CAMK2N1,DDIT3,IER3,ODC1	BHLHE40,CAMK2N1,DDIT3,IER3,ODC1
NOTCH1	-0.344	transcription regulator		-1.219	3.92e-05	CCND2,Cdkn1c,CEBPB,CNN1,DLL1,DLL4,ENO2,HMOX1,ICAM1,MPO,NOTCH1,SMARCC1	CCND2,Cdkn1c,CEBPB,CNN1,DLL1,DLL4,ENO2,HMOX1,ICAM1,MPO,NOTCH1,SMARCC1
SMARCA4	-0.179	transcription regulator		1.657	4.84e-05	A2M,ACTA1,ARL4C,BIN1,C8orf4,CEBPB,FOSL2,ICAM1,IER3,KCNJ2,MAFF,Mt1,NOSTRIN,PDE4B,RBP1,SOCS2,SOX17,TMEM204,TWF1,TXNRD1	A2M,ACTA1,ARL4C,BIN1,C8orf4,CEBPB,FOSL2,ICAM1,IER3,KCNJ2,MAFF,Mt1,NOSTRIN,PDE4B,RBP1,SOCS2,SOX17,TMEM204,TWF1,TXNRD1
HNF4A		transcription regulator		-0.447	6.77e-05	ARL4C,ATF7,BNIP1,C10orf10,C12orf49,C19orf66,C8orf4,CCNG2,Cdkn1c,CEBPB,CRKL,DBP,EDEM3,ERO1A,FOSL2,GPR146,HIF1A,HIF1AN,INTS7,MAT2A,Mt1,Mt2,NAMPT,NDRG1,NR1D1,P2RY2,PIK3R3,PLAGL2,PPFIBP2,PPP1R3B,PPP1R3C,PSME3,PTPN11,RAP2C,RORA,SGK1,SLC25A19,SLC37A4,SOX17,TCIRG1,TFAP4,TLN1,TRUB2,TXNRD1,YKT6	ARL4C,ATF7,BNIP1,C10orf10,C12orf49,C19orf66,C8orf4,CCNG2,Cdkn1c,CEBPB,CRKL,DBP,EDEM3,ERO1A,FOSL2,GPR146,HIF1A,HIF1AN,INTS7,MAT2A,Mt1,Mt2,NAMPT,NDRG1,NR1D1,P2RY2,PIK3R3,PLAGL2,PPFIBP2,PPP1R3B,PPP1R3C,PSME3,PTPN11,RAP2C,RORA,SGK1,SLC25A19,SLC37A4,SOX17,TCIRG1,TFAP4,TLN1,TRUB2,TXNRD1,YKT6
NFKB1	-0.011	transcription regulator		0.621	6.78e-05	A2M,BCL3,Ccl2,CCND2,DLL4,HMOX1,ICAM1,IER3,MAT2A,TNFAIP3,VEGFA,WT1	A2M,BCL3,Ccl2,CCND2,DLL4,HMOX1,ICAM1,IER3,MAT2A,TNFAIP3,VEGFA,WT1
MNT	0.237	transcription regulator			7.09e-05	CCND2,CCNG2,DDIT3,ODC1	CCND2,CCNG2,DDIT3,ODC1
SMAD4	-0.063	transcription regulator		1.02	8.92e-05	BGN,Ccl2,CCND2,CCNG2,HMOX1,ICAM1,IER3,NAMPT,SGK1,SMAD7,VEGFA	BGN,Ccl2,CCND2,CCNG2,HMOX1,ICAM1,IER3,NAMPT,SGK1,SMAD7,VEGFA
CREBBP	-0.103	transcription regulator			9.03e-05	ADORA2A,CCND2,DHRS3,FOSL2,GNG2,LGALS3BP,LIG4,MPO,NDRG1,NOTCH1,PPFIBP2,SLC1A2,TIPARP,TNFAIP3,VEGFA	ADORA2A,CCND2,DHRS3,FOSL2,GNG2,LGALS3BP,LIG4,MPO,NDRG1,NOTCH1,PPFIBP2,SLC1A2,TIPARP,TNFAIP3,VEGFA
MAX	0.02	transcription regulator		-0.447	9.77e-05	CCND2,CCNG2,DDIT3,EZH1,HK2,ODC1,SLC2A3	CCND2,CCNG2,DDIT3,EZH1,HK2,ODC1,SLC2A3
MYCN	-0.074	transcription regulator		1.534	0.000154	ABCC1,CCND2,CCNG2,EZH1,HK2,NDRG1,ODC1,RPL23,RPL30,SLC1A2,SLC25A19,SOX17	ABCC1,CCND2,CCNG2,EZH1,HK2,NDRG1,ODC1,RPL23,RPL30,SLC1A2,SLC25A19,SOX17
STAT5A	-0.118	transcription regulator		0.424	0.000181	A2M,CCND2,CEBPB,CISH,EGLN3,FOSL2,ICAM1,PPFIBP2,RORA,SELENBP1,SLC2A3,SOCS2	A2M,CCND2,CEBPB,CISH,EGLN3,FOSL2,ICAM1,PPFIBP2,RORA,SELENBP1,SLC2A3,SOCS2
TP73		transcription regulator		0.98	0.000216	ABCC1,BHLHE40,Ccl2,CCNG2,Cdkn1c,DBP,DDIT3,DDIT4,DHRS3,IER3,P2RY2,PIK3R3,VEGFA	ABCC1,BHLHE40,Ccl2,CCNG2,Cdkn1c,DBP,DDIT3,DDIT4,DHRS3,IER3,P2RY2,PIK3R3,VEGFA
STAT6	0.316	transcription regulator		1.331	0.00025	BCL3,Ccl2,CCND2,CISH,HIPK2,HLX,IRF7,IRF9,LGALS3BP,SAMSN1,SELENBP1,SOCS2	BCL3,Ccl2,CCND2,CISH,HIPK2,HLX,IRF7,IRF9,LGALS3BP,SAMSN1,SELENBP1,SOCS2
NOTCH4	0.234	transcription regulator		-1.109	0.000297	Cdkn1c,CNN1,DLL4,NOTCH1	Cdkn1c,CNN1,DLL4,NOTCH1
STAT1	0.173	transcription regulator		1.735	0.000339	A2M,Ccl2,CCND2,EGLN3,GBP6,HIF1A,ICAM1,IRF7,IRF9,NEURL3,SMAD7,STAT3	A2M,Ccl2,CCND2,EGLN3,GBP6,HIF1A,ICAM1,IRF7,IRF9,NEURL3,SMAD7,STAT3
HIF3A	0.128	transcription regulator			0.000461	HIF1A,STAT3,VEGFA	HIF1A,STAT3,VEGFA
MTPN	-0.136	transcription regulator		0	0.000486	BNIP3,CASQ1,Ccl2,CCND2,Mt1,TUBA1A	BNIP3,CASQ1,Ccl2,CCND2,Mt1,TUBA1A
KLF2	-0.201	transcription regulator		-0.392	0.000524	ADM,BCL3,Ccl2,DLL1,HIF1A,NDRG1,PLOD2,TGFBR1	ADM,BCL3,Ccl2,DLL1,HIF1A,NDRG1,PLOD2,TGFBR1
PPARGC1B	0.244	transcription regulator		1.342	0.000581	EGLN3,ERO1A,FDFT1,HK2,VEGFA	EGLN3,ERO1A,FDFT1,HK2,VEGFA
TCF7L2	0.11	transcription regulator		0.102	0.000584	BIN1,CAMK2N1,CCND2,G2E3,HIPK2,PIM3,PTPN11,SLC1A2,SMAD7,SNX18,TWF1,VEGFA	BIN1,CAMK2N1,CCND2,G2E3,HIPK2,PIM3,PTPN11,SLC1A2,SMAD7,SNX18,TWF1,VEGFA
TP63		transcription regulator		1.354	0.000723	ADM,BCL3,BHLHE40,CCND2,DDIT4,DLL1,HK2,IER3,MAFF,NOTCH1,PIK3R3,SEPHS1,VEGFA	ADM,BCL3,BHLHE40,CCND2,DDIT4,DLL1,HK2,IER3,MAFF,NOTCH1,PIK3R3,SEPHS1,VEGFA
TEAD4	-0.352	transcription regulator			0.000823	ACTA1,HIF1A,SLC2A3,VEGFA	ACTA1,HIF1A,SLC2A3,VEGFA
ZKSCAN3	-0.033	transcription regulator			0.000865	CCND2,VEGFA	CCND2,VEGFA
CTNNB1	-0.07	transcription regulator		1.724	0.000998	ABCC1,BGN,BHLHE40,CCND2,Cdkn1c,DDIT3,DLL4,ENO2,HILPDA,NOTCH1,PDE4B,SGK1,SLC1A2,SMAD7,SOX17,STAT3,SYNM,VEGFA,WT1	ABCC1,BGN,BHLHE40,CCND2,Cdkn1c,DDIT3,DLL4,ENO2,HILPDA,NOTCH1,PDE4B,SGK1,SLC1A2,SMAD7,SOX17,STAT3,SYNM,VEGFA,WT1
SMAD7	0.537	transcription regulator		-1.124	0.00111	BGN,Ccl2,HMOX1,ICAM1,SMAD7,TGFBR1,VEGFA	BGN,Ccl2,HMOX1,ICAM1,SMAD7,TGFBR1,VEGFA
TRIM24	0.083	transcription regulator	Inhibited	-2.236	0.00118	Bst2,IRF7,IRF9,LGALS3BP,SOCS2,VEGFA	Bst2,IRF7,IRF9,LGALS3BP,SOCS2,VEGFA
ATN1	0.052	transcription regulator			0.00126	BHLHE40,DBP,ENO2,KCNK3,NAB2,Sik1,SOCS2	BHLHE40,DBP,ENO2,KCNK3,NAB2,Sik1,SOCS2
JARID2	0.133	transcription regulator			0.00126	CCND2,NOTCH1,SOX17	CCND2,NOTCH1,SOX17
NAB2	0.45	transcription regulator			0.00148	HIF1A,NAB2,RRAD	HIF1A,NAB2,RRAD
MAFK	-0.304	transcription regulator			0.00172	EGLN3,HMOX1,TXNRD1	EGLN3,HMOX1,TXNRD1
GPS2	-0.016	transcription regulator	Inhibited	-2	0.00196	BIN1,Ccl2,DHRS3,SGK1	BIN1,Ccl2,DHRS3,SGK1
FOXC1	-0.196	transcription regulator			0.00199	DLL1,NOTCH1,PLOD1	DLL1,NOTCH1,PLOD1
SMAD3	0.051	transcription regulator		1.617	0.00205	BGN,Ccl2,CCND2,CCNG2,HMOX1,SMAD7,STAT3,TGFBR1,VEGFA	BGN,Ccl2,CCND2,CCNG2,HMOX1,SMAD7,STAT3,TGFBR1,VEGFA
CEBPA	0.086	transcription regulator		-1	0.00208	A2M,ARL4C,BIN1,CCND2,CEBPB,HMOX1,ICAM1,IER3,MALT1,MPO,PLOD2,PPP1R3C,RORA	A2M,ARL4C,BIN1,CCND2,CEBPB,HMOX1,ICAM1,IER3,MALT1,MPO,PLOD2,PPP1R3C,RORA
SF1		transcription regulator			0.00213	CNN1,ICAM1	CNN1,ICAM1
CLOCK	-0.173	transcription regulator			0.00223	BHLHE40,DBP,DDIT3,ICAM1,JMJD6,PER1,SLC1A2	BHLHE40,DBP,DDIT3,ICAM1,JMJD6,PER1,SLC1A2
HMGA1	-0.01	transcription regulator		-0.926	0.00231	CCND2,DDIT3,FOSL2,IER3,INSIG1,SOX17,STAT3	CCND2,DDIT3,FOSL2,IER3,INSIG1,SOX17,STAT3
BMI1		transcription regulator			0.0025	BNIP3,DLC1,HK2,P4HA1	BNIP3,DLC1,HK2,P4HA1
KDM3A	0.544	transcription regulator			0.00295	ADM,HMOX1	ADM,HMOX1
MYCBP	-0.07	transcription regulator			0.00295	CCND2,ODC1	CCND2,ODC1
RBCK1	0.02	transcription regulator			0.00295	ICAM1,TNFAIP3	ICAM1,TNFAIP3
MYOCD	-0.086	transcription regulator		-1.118	0.00339	ACTA1,CNN1,DDIT3,TTN,VEGFA	ACTA1,CNN1,DDIT3,TTN,VEGFA
NKX3-1		transcription regulator			0.00362	CA12,CTSV,EZH1,STAT3	CA12,CTSV,EZH1,STAT3
NFKBIB	0.021	transcription regulator			0.00362	CTSV,ICAM1,SMAD7,VEGFA	CTSV,ICAM1,SMAD7,VEGFA
TAF4B	-0.118	transcription regulator			0.00373	CCND2,IER3,TNFAIP3	CCND2,IER3,TNFAIP3
HDAC1	-0.195	transcription regulator		0.816	0.00377	CCND2,GABARAPL1,Mt1,Mt2,PFKFB3,SGK1,SLC1A2,ST5,STAT3	CCND2,GABARAPL1,Mt1,Mt2,PFKFB3,SGK1,SLC1A2,ST5,STAT3
KLF4	-0.079	transcription regulator		-0.061	0.00377	CCND2,DLL1,DLL4,NOTCH1,ODC1,SOX17,TGFBR1,TXNRD1,VEGFA	CCND2,DLL1,DLL4,NOTCH1,ODC1,SOX17,TGFBR1,TXNRD1,VEGFA
YY1	-0.048	transcription regulator			0.00377	ACTA1,Cdkn1c,HMOX1,MAT2A,RPL30,SLC1A2,TGFBR1,VEGFA,WT1	ACTA1,Cdkn1c,HMOX1,MAT2A,RPL30,SLC1A2,TGFBR1,VEGFA,WT1
STAT5B	0.139	transcription regulator		0.447	0.00408	A2M,CCND2,CISH,FOSL2,PPP1R3C,SLC39A10,SOCS2	A2M,CCND2,CISH,FOSL2,PPP1R3C,SLC39A10,SOCS2
SP3	0.065	transcription regulator			0.00485	Ccl2,MAT2A,SGK1,SLC2A3,SMARCC1,TGFBR1,TXNRD1,VEGFA	Ccl2,MAT2A,SGK1,SLC2A3,SMARCC1,TGFBR1,TXNRD1,VEGFA
MSGN1		transcription regulator			0.00498	DLL1,NOTCH1	DLL1,NOTCH1
SIAH2	0.207	transcription regulator			0.0051	EGLN3,HIF1A,NDRG1	EGLN3,HIF1A,NDRG1
NKX2-3		transcription regulator		-0.757	0.00526	ADM,C19orf66,C8orf4,MFNG,PIM3,RPL23,SMAD7,TIPARP	ADM,C19orf66,C8orf4,MFNG,PIM3,RPL23,SMAD7,TIPARP
BRCA1	-0.029	transcription regulator	Activated	2.433	0.0056	DDIT3,DDIT4,H3F3A/H3F3B,HMOX1,IRF7,NOTCH1,VEGFA	DDIT3,DDIT4,H3F3A/H3F3B,HMOX1,IRF7,NOTCH1,VEGFA
HEY2	0.195	transcription regulator			0.00562	ACTA1,CNN1,KCNJ2	ACTA1,CNN1,KCNJ2
DDIT3	1.072	transcription regulator		1.969	0.0057	DDIT3,ERO1A,HMOX1,STAT3	DDIT3,ERO1A,HMOX1,STAT3
ATF6	-0.025	transcription regulator			0.0057	CEBPB,CHKB,DDIT3,VEGFA	CEBPB,CHKB,DDIT3,VEGFA
HOXC8		transcription regulator			0.00616	Ccl2,CNN1,FZD2	Ccl2,CNN1,FZD2
CITED2	-0.112	transcription regulator			0.00616	HIF1A,TNFAIP3,VEGFA	HIF1A,TNFAIP3,VEGFA
ETV6	-0.031	transcription regulator			0.00618	DLL4,VEGFA	DLL4,VEGFA
HOXA10		transcription regulator		-1.134	0.00632	ACTA1,ADM,Cdkn1c,CTSV,DBP,MFNG,RBP1	ACTA1,ADM,Cdkn1c,CTSV,DBP,MFNG,RBP1
NRIP1	-0.166	transcription regulator			0.00641	CCNG2,MMD,PPP1R3B,SLC25A19	CCNG2,MMD,PPP1R3B,SLC25A19
FOS	2.006	transcription regulator		0	0.00655	A2M,ABCC1,CTSV,ENAH,HMOX1,ICAM1,LGALS3BP,Mt2,ODC1,RBP1,SELENBP1,SMAD7,TIPARP,VEGFA	A2M,ABCC1,CTSV,ENAH,HMOX1,ICAM1,LGALS3BP,Mt2,ODC1,RBP1,SELENBP1,SMAD7,TIPARP,VEGFA
MXD1	0.136	transcription regulator			0.00749	CCND2,ODC1	CCND2,ODC1
WT1	0.569	transcription regulator		-0.543	0.00756	CTSV,ENO2,FDFT1,NDRG1,ODC1,SLC2A3,VEGFA,WT1	CTSV,ENO2,FDFT1,NDRG1,ODC1,SLC2A3,VEGFA,WT1
FOXL2		transcription regulator	Activated	2	0.00802	ICAM1,IER3,MAFF,TNFAIP3	ICAM1,IER3,MAFF,TNFAIP3
REL	-0.325	transcription regulator		0.394	0.00834	BCL3,CCND2,CRKL,ICAM1,IER3,NAB2,STAT3,TNFAIP3	BCL3,CCND2,CRKL,ICAM1,IER3,NAB2,STAT3,TNFAIP3
KLF6	0.044	transcription regulator		-0.9	0.00845	Ccl2,NR1D1,TGFBR1,VEGFA	Ccl2,NR1D1,TGFBR1,VEGFA
CREB3	0.085	transcription regulator			0.00892	DDIT3,INSIG1	DDIT3,INSIG1
IRF4		transcription regulator		-1.706	0.00917	BNIP3,Ccl2,DDIT3,IRF7,IRF9,RORA	BNIP3,Ccl2,DDIT3,IRF7,IRF9,RORA
PCGF2	0.343	transcription regulator			0.00937	CCND2,NOTCH1,TXLNA	CCND2,NOTCH1,TXLNA
FOXA2		transcription regulator			0.00938	A2M,CNN1,FABP5,HK2,Mt1,RORA,SOX17	A2M,CNN1,FABP5,HK2,Mt1,RORA,SOX17
EGR3		transcription regulator			0.0101	NAB2,NOTCH1,PTPN11	NAB2,NOTCH1,PTPN11
ASXL1	-0.063	transcription regulator			0.0101	ENO2,HK2,VEGFA	ENO2,HK2,VEGFA
FOXO1	-0.127	transcription regulator	Activated	2.773	0.0103	A2M,CCNG2,Cdkn1c,CTSV,DDIT4,HMOX1,ICAM1,IER3,NAMPT,SGK1	A2M,CCNG2,Cdkn1c,CTSV,DDIT4,HMOX1,ICAM1,IER3,NAMPT,SGK1
PER2	-0.105	transcription regulator			0.0105	DBP,PER1	DBP,PER1
CEBPB	0.671	transcription regulator	Activated	2.479	0.0109	Ccl2,CCND2,CEBPB,DDIT3,ICAM1,IER3,IRF9,ODC1,RORA,SGK1,STAT3	Ccl2,CCND2,CEBPB,DDIT3,ICAM1,IER3,IRF9,ODC1,RORA,SGK1,STAT3
CARM1	0.038	transcription regulator			0.0117	Ccl2,ICAM1,STC2	Ccl2,ICAM1,STC2
GLI1	0.661	transcription regulator		0.322	0.0118	Ccl2,CCND2,INSIG1,PLOD1,RPL30,VEGFA,ZC3HAV1L	Ccl2,CCND2,INSIG1,PLOD1,RPL30,VEGFA,ZC3HAV1L
SREBF2	0.136	transcription regulator		1.981	0.012	FABP5,FDFT1,INSIG1,STARD4	FABP5,FDFT1,INSIG1,STARD4
DEPDC1	0.054	transcription regulator			0.0121	TNFAIP3	TNFAIP3
CITED4	0.211	transcription regulator			0.0121	HIF1A	HIF1A
MED7	0.165	transcription regulator			0.0121	TNFAIP3	TNFAIP3
TFCP2	-0.001	transcription regulator			0.0121	A2M,WT1	A2M,WT1
PTGES2	-0.196	transcription regulator			0.0121	IRF9	IRF9
MED21	0.081	transcription regulator			0.0121	TNFAIP3	TNFAIP3
HDAC6	0.028	transcription regulator			0.0134	HIF1A,SLC1A2,TGFBR1	HIF1A,SLC1A2,TGFBR1
TBX2	-0.339	transcription regulator		-1	0.0137	BHLHE40,DBP,DDIT3,PHTF2	BHLHE40,DBP,DDIT3,PHTF2
SOX3	-0.193	transcription regulator		-1	0.015	DLL1,SOX17,TXNRD1,VEGFA	DLL1,SOX17,TXNRD1,VEGFA
USF1	-0.011	transcription regulator			0.015	CCNG2,Mt1,P4HA1,TNFAIP3	CCNG2,Mt1,P4HA1,TNFAIP3
ARNTL	-0.098	transcription regulator			0.0152	DBP,NR1D1,PER1	DBP,NR1D1,PER1
MAFG	0.218	transcription regulator			0.0157	HMOX1,TXNRD1	HMOX1,TXNRD1
SKIL	-0.027	transcription regulator			0.0162	SMAD7,SOX17,TLN1	SMAD7,SOX17,TLN1
PPRC1	-0.274	transcription regulator			0.0172	DDIT4,HK2,NAMPT	DDIT4,HK2,NAMPT
KCNIP3	-0.444	transcription regulator			0.0177	FOSL2,TNFAIP3	FOSL2,TNFAIP3
CBFA2T3	-0.466	transcription regulator			0.0177	Bst2,PFKFB3	Bst2,PFKFB3
PML	0.118	transcription regulator		0.298	0.0182	HMOX1,MAFF,NDRG1,TNFAIP3,TXNRD1	HMOX1,MAFF,NDRG1,TNFAIP3,TXNRD1
SMAD2	-0.128	transcription regulator		1.964	0.0184	BGN,CCNG2,HMOX1,SMAD7	BGN,CCNG2,HMOX1,SMAD7
STAT2	0.11	transcription regulator			0.0193	Ccl2,IRF7,IRF9	Ccl2,IRF7,IRF9
COPS5	-0.018	transcription regulator			0.0197	HIF1A,STAT3	HIF1A,STAT3
HDAC7	0.183	transcription regulator			0.0197	DLL4,SLC1A2	DLL4,SLC1A2
JUN	-0.001	transcription regulator		1.097	0.0198	A2M,BCL3,Ccl2,CCND2,FLNC,HMOX1,ICAM1,MAT2A,SGK1,SMAD7,VEGFA	A2M,BCL3,Ccl2,CCND2,FLNC,HMOX1,ICAM1,MAT2A,SGK1,SMAD7,VEGFA
PITX2	-0.102	transcription regulator			0.0199	CCND2,FZD2,PLOD1,PLOD2	CCND2,FZD2,PLOD1,PLOD2
PDX1		transcription regulator		1.698	0.0206	CAMK2N1,Ccl2,IER3,INSIG1,Mt1,PDE4B	CAMK2N1,Ccl2,IER3,INSIG1,Mt1,PDE4B
EBF1	-0.038	transcription regulator			0.0219	CEBPB,HK2,IRF7,PIK3R3,PPP1R3C	CEBPB,HK2,IRF7,PIK3R3,PPP1R3C
ATOH1		transcription regulator			0.0219	Cdkn1c,DLL1	Cdkn1c,DLL1
RUNX1	-0.147	transcription regulator		1.067	0.0222	Cdkn1c,MPO,Mt1,SOX17,STAT3,VEGFA	Cdkn1c,MPO,Mt1,SOX17,STAT3,VEGFA
HDAC3	-0.086	transcription regulator			0.0231	HMOX1,ICAM1,SLC1A2,SMAD7	HMOX1,ICAM1,SLC1A2,SMAD7
ASH1L	-0.08	transcription regulator			0.0241	TNFAIP3	TNFAIP3
MLX	-0.013	transcription regulator			0.0241	Ccl2,LGALS3BP	Ccl2,LGALS3BP
SALL1	-0.378	transcription regulator			0.0241	VEGFA	VEGFA
ZNF197		transcription regulator			0.0241	HIF1A	HIF1A
MXD4	-0.395	transcription regulator			0.0241	ODC1	ODC1
CUX2	0.065	transcription regulator			0.0241	DLL1	DLL1
DNAJB1	-0.051	transcription regulator			0.0241	RORA	RORA
Bhlhe41	1.076	transcription regulator			0.0241	PER1	PER1
FUS		transcription regulator			0.0241	ICAM1	ICAM1
RFX4		transcription regulator			0.0241	RPL30	RPL30
KDM5B	0.133	transcription regulator		-0.447	0.0252	DDIT3,FABP5,INSIG1,LGALS3BP,PSME3	DDIT3,FABP5,INSIG1,LGALS3BP,PSME3
CEBPE		transcription regulator			0.0252	CCND2,CEBPB,CTSV	CCND2,CEBPB,CTSV
ASCL1		transcription regulator			0.0257	CCNG2,DLL1,DLL4,MFNG	CCNG2,DLL1,DLL4,MFNG
SIN3B	0.022	transcription regulator			0.0264	CCNG2,DDIT3	CCNG2,DDIT3
TFE3	0.065	transcription regulator			0.0264	SMAD7,WT1	SMAD7,WT1
NFE2L2	0.071	transcription regulator		0.971	0.027	ABCC1,ATF7,BNIP3,Ccl2,DDIT3,HMOX1,MAFF,Mt1,TXNRD1,VEGFA	ABCC1,ATF7,BNIP3,Ccl2,DDIT3,HMOX1,MAFF,Mt1,TXNRD1,VEGFA
SKI	0.004	transcription regulator			0.0288	ODC1,SMAD7	ODC1,SMAD7
HEY1	0.023	transcription regulator			0.0288	Cdkn1c,CNN1	Cdkn1c,CNN1
CEBPD	0.612	transcription regulator		0.883	0.0305	Ccl2,CEBPB,DDIT3,HIF1A	Ccl2,CEBPB,DDIT3,HIF1A
ZBTB7A	-0.198	transcription regulator			0.0313	DLL4,SLC2A3	DLL4,SLC2A3
SIN3A	-0.043	transcription regulator			0.0334	CCND2,CCNG2,DDIT3	CCND2,CCNG2,DDIT3
FOXP3		transcription regulator			0.0335	CYSLTR1,SMAD7,TNFAIP3,VEGFA	CYSLTR1,SMAD7,TNFAIP3,VEGFA
USF2	0.036	transcription regulator			0.0348	HMOX1,LGALS3BP,P4HA1	HMOX1,LGALS3BP,P4HA1
BCL6	-0.509	transcription regulator			0.0354	A2M,BCL3,Ccl2,CCND2,IRF9	A2M,BCL3,Ccl2,CCND2,IRF9
CERS5	-0.016	transcription regulator			0.0359	DDIT3	DDIT3
TBX6		transcription regulator			0.0359	DLL1	DLL1
PSMC5	-0.077	transcription regulator			0.0359	CCND2	CCND2
EAF2		transcription regulator			0.0359	HIF1A	HIF1A
MXD3	0.258	transcription regulator			0.0359	ODC1	ODC1
YBX1	0.022	transcription regulator			0.0379	Ccl2,SLC2A3,STC2	Ccl2,SLC2A3,STC2
EGR2	1.254	transcription regulator		0.832	0.038	ABCC1,NAB2,NOTCH1,RRAD,VEGFA	ABCC1,NAB2,NOTCH1,RRAD,VEGFA
MED1	0.008	transcription regulator			0.0389	BCL3,BHLHE40,CCND2,ODC1,STC2	BCL3,BHLHE40,CCND2,ODC1,STC2
RCAN1	0.014	transcription regulator			0.0393	ACTA1,ICAM1	ACTA1,ICAM1
DTX1	0.389	transcription regulator			0.0393	HIGD1A,VEGFA	HIGD1A,VEGFA
VAV1	-0.007	transcription regulator			0.0393	CCND2,VEGFA	CCND2,VEGFA
SMAD5	-0.11	transcription regulator			0.0393	DIDO1,VEGFA	DIDO1,VEGFA
SP4	-0.154	transcription regulator			0.0421	MAT2A,VEGFA	MAT2A,VEGFA
EOMES		transcription regulator			0.0444	FZD8,SOX17,STAT3	FZD8,SOX17,STAT3
ID1	0.099	transcription regulator			0.0444	ICAM1,NOTCH1,SMARCC1	ICAM1,NOTCH1,SMARCC1
JUND	-0.145	transcription regulator			0.0461	BCL3,HMOX1,VEGFA	BCL3,HMOX1,VEGFA
CCND1	-0.197	transcription regulator			0.0466	ARMCX1,CCND2,EIF5A2,IER3,MAFF,SELENBP1,STARD4,TMEM204	ARMCX1,CCND2,EIF5A2,IER3,MAFF,SELENBP1,STARD4,TMEM204
IRF1	0.408	transcription regulator		1.387	0.0467	IRF7,IRF9,LIG4,ODC1,STAT3	IRF7,IRF9,LIG4,ODC1,STAT3
ETS1	0.124	transcription regulator	Activated	2	0.0476	ARL4C,Ccl2,HMOX1,ICAM1,INSIG1,VEGFA	ARL4C,Ccl2,HMOX1,ICAM1,INSIG1,VEGFA
NPAS4	0.547	transcription regulator			0.0476	DDIT3	DDIT3
ATF6B	0.01	transcription regulator			0.0476	DDIT3	DDIT3
ZNF24	-0.221	transcription regulator			0.0476	CCND2	CCND2
ZNF467	0.075	transcription regulator			0.0476	CISH	CISH
ZNF281	-0.191	transcription regulator			0.0476	ODC1	ODC1
PLAGL2	-0.348	transcription regulator			0.0476	BNIP3	BNIP3
EPC1	0.036	transcription regulator			0.0476	ACTA1	ACTA1
ZFP36	0.943	transcription regulator			0.0479	HIF1A,ICAM1,IER3	HIF1A,ICAM1,IER3
SPDEF		transcription regulator			0.0497	FZD8,HIF1A,SOX17	FZD8,HIF1A,SOX17

## Sheet: Dll4Cdh5_UpRegTransc
Upstream Regulator	Expr Log Ratio	Molecule Type	Predicted Activation State	Activation z-score	p-value of overlap	Target molecules in dataset
IRF7	1.462	transcription regulator	Activated	3.104	1.31e-10	CMPK2,HELZ2,IFITM3,Irgm1,Oasl2,PARP14,RSAD2,SAMD9L,STAT1,STAT2
ATF4	0.322	transcription regulator	Activated	3.104	1.51e-10	ASNS,ATF5,CDKN1A,CHAC1,DDIT3,MTHFD2,SARS,SHMT2,SLC7A3,STC2,TRIB3,VEGFA
IRF3	0.065	transcription regulator	Activated	3.254	1.4e-09	Bst2,CMPK2,HELZ2,IFITM3,Irgm1,Oasl2,PARP14,RSAD2,SAMD9L,STAT1,STAT2
HIF1A	0.812	transcription regulator		1.407	5.79e-09	APLN,BCL2,BNIP3,CDKN1A,EGLN3,P4HA1,P4HA2,PDGFB,SLC16A3,SLC29A1,VEGFA
TRIM24	0.056	transcription regulator	Inhibited	-2.598	1.44e-06	Bst2,CMPK2,Irgm1,SAMD9L,STAT1,STAT2,UBA7,VEGFA
IRF5	-0.113	transcription regulator	Activated	2.401	1.48e-06	CMPK2,IFITM3,Oasl2,RSAD2,STAT1,STAT2
STAT1	0.574	transcription regulator	Activated	2.97	7.87e-06	C3,CDKN1A,CMPK2,IRF8,Irgm1,NEURL3,RSAD2,STAT1,STAT2
CEBPB	0.575	transcription regulator		0.844	8.74e-06	APLN,APLNR,ASNS,CDKN1A,EMCN,FABP4,FOS,LYN,PLAUR,TRIB3
TP53	0.135	transcription regulator		-0.299	1.11e-05	ABAT,BCL2,CAV1,CDKN1A,ESR1,FABP4,FLRT2,FOS,H2AFX,HMOX1,IRF8,Mt2,P4HA1,PDGFB,SGK1,STAT1,TRIB3,UPP1,VEGFA
EPAS1	0.009	transcription regulator		1.982	2.88e-05	APLN,BCL2,BNIP3,CAV1,VEGFA
NKX2-3		transcription regulator			3.13e-05	CD300LG,CD34,EMCN
STAT3	0.246	transcription regulator		-0.806	3.68e-05	CDKN1A,CMPK2,FOS,HLA-A,Irgm1,NEURL3,RSAD2,STAT1,STAT2,VEGFA
CARM1	0.057	transcription regulator			0.00012	C3,CDKN1A,STC2
DDIT3	0.637	transcription regulator		1.951	0.000125	ATF5,DDIT3,SARS,TRIB3
FOXP3		transcription regulator		-0.283	0.000161	BCL2,CDKN1A,DUSP6,HLA-A
NFATC2	-0.268	transcription regulator	Activated	2.449	0.000166	CMPK2,HELZ2,RSAD2,SH3BP5,STAT1,STAT2
ELK3	0.24	transcription regulator			0.000414	FOS,HMOX1
IRF9	0.6	transcription regulator			0.000429	IRF8,STAT1,STAT2
TFAM	0.016	transcription regulator			0.000507	FABP4,FABP5,PFKP
CREB1	-0.11	transcription regulator	Activated	2.219	0.000595	APOLD1,BCL2,BHLHE40,FOS,VEGFA
SMAD5	0.013	transcription regulator			0.000686	PDGFB,VEGFA
FOXO3	-0.103	transcription regulator		-0.314	0.000702	AQP4,BNIP3,CDKN1A,FOS,VEGFA
CLOCK	0.092	transcription regulator			0.000934	ANGPTL4,BHLHE40,DDIT3,GIMAP4,SLC1A2,SLC20A1
ZBTB7A	0.027	transcription regulator			0.00102	DLL4,PFKP
NLRC5		transcription regulator			0.00143	B2M,HLA-A
BRCA1	-0.131	transcription regulator			0.00162	CDKN1A,ESR1,HMOX1
JUN	-0.045	transcription regulator		1.103	0.00168	CDKN1A,FABP4,GAP43,PLAU,STAT1
SMAD3	-0.13	transcription regulator		0.891	0.00175	BCL2,CDKN1A,ESR1,FOS,LGALS9B
CDKN2A		transcription regulator		0.181	0.00183	BCL2,C3,CDKN1A,H2AFX,VEGFA
KLF4	-0.156	transcription regulator			0.00285	CDKN1A,IFITM3,PLAUR
HDAC2	-0.061	transcription regulator			0.00298	CD34,CDKN1A,ESR1,PDGFB
SMARCB1	-0.096	transcription regulator			0.00298	BNIP3,CDKN1A,ETS2,FABP4
SMAD1	-0.041	transcription regulator			0.003	PDGFB,VEGFA
SKI	-0.026	transcription regulator			0.00365	CDKN1A,ODC1
MEF2A	-0.054	transcription regulator			0.00365	FOS,XIRP2
Ncoa6	0.014	transcription regulator			0.00365	FABP4,FOS
PROX1	-0.131	transcription regulator			0.00365	CD34,FLT4
FOS	0.894	transcription regulator			0.00435	APLN,FABP4,FLRT2,FOS,HMOX1,Mt2,ODC1
MAFK	0.183	transcription regulator			0.00436	EGLN3,HMOX1
BACH2	0.083	transcription regulator			0.00487	BCL2,EGLN3,HMOX1
NFATC3	0.022	transcription regulator			0.00512	FOS,GAP43
VHL	-0.176	transcription regulator			0.00512	BNIP3,VEGFA
NFYA	0.033	transcription regulator			0.00682	BCL2,CDKN1A
CREM	0.028	transcription regulator		1.982	0.00694	APOLD1,BHLHE40,FOS,VEGFA
NFE2L2	-0.026	transcription regulator	Activated	2.18	0.00699	BCL2,BNIP3,FABP4,HMOX1,Mt1,PKIA,RRS1,VEGFA
CREBBP	-0.047	transcription regulator			0.00707	ADORA2A,CDKN1A,ESAM,FABP4,FOS,GIMAP4,RSAD2
SOX4	-0.294	transcription regulator		1	0.00749	BCL2,CHAC1,Mt1,SLC7A3
CEBPA	-0.706	transcription regulator	Activated	2.191	0.00776	APLN,APLNR,CDKN1A,EMCN,FABP4
RBPJ	-0.196	transcription regulator			0.00807	CDKN1A,FOS,IRF8,VEGFA
SALL2	-0.055	transcription regulator			0.00838	CDKN1A
BRF1	-0.018	transcription regulator			0.00838	CDKN1A
POU4F3		transcription regulator			0.00838	FOS
PLAGL2	-0.141	transcription regulator			0.00838	BNIP3
BACH1	0.151	transcription regulator			0.00838	HMOX1
ILF2	-0.041	transcription regulator			0.00838	FOS
CTNNB1	0.024	transcription regulator		0.896	0.00871	AQP4,BHLHE40,CDKN1A,FABP4,GAP43,IRF8,SGK1,WT1
RELA	0.016	transcription regulator		0.849	0.009	DDIT3,FOS,HMOX1,PDGFB
MYB		transcription regulator			0.011	BCL2,ESAM,PDE2A
PTTG1	-0.038	transcription regulator			0.0132	BCL2,CDKN1A
CITED2	-0.211	transcription regulator			0.0132	ANGPTL4,VEGFA
CBX1	-0.013	transcription regulator			0.0167	CDKN1A
CBX5	-0.061	transcription regulator			0.0167	CDKN1A
TGFB1I1	-0.08	transcription regulator			0.0167	KRT19
ILF3	-0.025	transcription regulator			0.0167	FOS
Cops2	-0.1	transcription regulator			0.0167	CDKN1A
REL	0.299	transcription regulator			0.0171	CDKN1A,ESR1,IRF8,PARP14,RSAD2
PPARGC1B	0.256	transcription regulator			0.0171	EGLN3,VEGFA
ING1	0.024	transcription regulator			0.0171	ANGPTL4,CDKN1A
PPARGC1A	-0.057	transcription regulator			0.0184	EGLN1,FABP4,TRIB3,VEGFA
MEN1	0.041	transcription regulator			0.0185	CDKN1A,FABP4
SMARCA4	0.019	transcription regulator			0.0187	CDKN1A,FABP4,Mt1
NRF1	-0.037	transcription regulator			0.0199	HMOX1,Mt1
HOXC8		transcription regulator			0.0214	KRT19,SLC16A3
HDAC1	0.215	transcription regulator		-0.117	0.0239	CD34,CDKN1A,PDGFB,SGK1
ID1	0.034	transcription regulator			0.0244	CDKN1A,FABP4
ATF2	-0.05	transcription regulator			0.0244	ASNS,DDIT3
CREB3L2	0.051	transcription regulator			0.0249	ATF5
NKAP	-0.127	transcription regulator			0.0249	ST8SIA4
BCL11A	-0.349	transcription regulator			0.0249	BCL2
MED14	-0.097	transcription regulator			0.0249	FABP4
ARID1B	0.042	transcription regulator			0.0249	FOS
HIF3A	-0.037	transcription regulator			0.0249	VEGFA
HHEX	0.342	transcription regulator			0.0249	VEGFA
BRD8	0.078	transcription regulator			0.0249	FABP4
GFI1B		transcription regulator			0.0249	CDKN1A
TSG101	-0.118	transcription regulator			0.0249	CDKN1A
LMO2	0.177	transcription regulator			0.0249	ERG
E2F1	0.015	transcription regulator			0.0257	BCL2,BNIP3,CAV1,FOS
ARNT	0.028	transcription regulator			0.026	BCL2,BNIP3,VEGFA
FOXO1	-0.145	transcription regulator	Activated	2	0.0276	BCL2,CDKN1A,FOS,STAT2
STAT5A	-0.062	transcription regulator			0.0303	BCL2,CDKN1A,FABP4,FOS
FOXI1		transcription regulator			0.0331	SLC4A1
NOTCH4	0.443	transcription regulator			0.0331	DLL4
ARNT2	-0.285	transcription regulator			0.0331	VEGFA
HIVEP2	0.002	transcription regulator			0.0331	FOS
ZBTB17	0.178	transcription regulator			0.0331	BCL2
CBX3	-0.115	transcription regulator			0.0331	CDKN1A
E2F3	0.012	transcription regulator			0.0384	CDKN1A,SPARCL1
MYC	0.343	transcription regulator			0.0384	CDKN1A,FABP4,ODC1,SLC16A3
ID2	-0.283	transcription regulator			0.0391	BCL2,CDKN1A,ETS2,IRF8
SQSTM1	0.075	transcription regulator			0.0403	HMOX1,RSAD2
CERS2	0.006	transcription regulator			0.0412	CDKN1A
KIDINS220	0.022	transcription regulator			0.0412	FOS
FOXD3		transcription regulator			0.0412	CDKN1A
DMTF1	0.004	transcription regulator			0.0412	CDKN1A
SUPT5H	0.102	transcription regulator			0.0412	CDKN1A
HLF	-0.322	transcription regulator			0.0412	AQP4
HTT	0.058	transcription regulator			0.0449	ADORA2A,FOS,PPP1R1A,RRS1
JUNB	0.22	transcription regulator			0.0462	C3,PLAU
STAT5B	0.051	transcription regulator			0.0469	BCL2,CDKN1A,ST8SIA4
Rhox4b (includes others)		transcription regulator			0.0492	CD34
HUWE1	-0.049	transcription regulator			0.0492	CDKN1A
MYF5		transcription regulator			0.0492	CDKN1A
NUPR1	-0.141	transcription regulator			0.0492	BNIP3

## Sheet: JAG1NF_CardSystDevFunc
Category	Diseases or Functions Annotation	p-Value	Predicted Activation State	Activation z-score	Molecules
Cardiovascular System Development and Function	development of vasculature	0.000172		1.077	A2M,ACTA2,BMP10,BMP6,C3,CCNE1,CD36,CDKN1B,COL13A1,COMP,CYCS,DLL1,EGLN3,ERG,FABP4,FNIP1,GSN,HEYL,HMOX1,HOXA3,HSPB1,JAG1,KCNJ2,LGALS3,LOXL2,LRP2,PDE2A,PLVAP,RORA,SMAD7,SMAD9,SMOC2,STAB2,VEGFA,WT1
Cardiovascular System Development and Function	morphology of cardiovascular system	0.000172			ACTA2,BMP10,CAV3,CCNE1,CD36,CDKN1B,Cdkn1c,EGLN3,EPM2A,ERG,FABP3,HEYL,HMOX1,HOXA3,IRX4,ITPA,JAG1,LOXL2,MOV10L1,MSTN,MYL2,PLVAP,SMAD7,SMAD9,VEGFA,WT1
Cardiovascular System Development and Function	angiogenesis	0.000338		1.077	BMP10,BMP6,C3,CCNE1,CD36,CDKN1B,COL13A1,COMP,CYCS,DLL1,EGLN3,ERG,FABP4,FNIP1,GSN,HEYL,HMOX1,HSPB1,JAG1,KCNJ2,LGALS3,LOXL2,LRP2,PDE2A,PLVAP,RORA,SMAD7,SMOC2,STAB2,VEGFA,WT1
Cardiovascular System Development and Function	cardiogenesis	0.000342		0.896	BMP10,CAV3,CDKN1B,DLL1,HEYL,HMOX1,IRX4,ITPA,JAG1,LOXL2,LRP2,MOV10L1,MSTN,MYL2,MYL3,PDE2A,SMAD7,SMAD9,TCAP,VEGFA,WT1
Cardiovascular System Development and Function	vasculogenesis	0.000356		1.214	BMP6,C3,CCNE1,CD36,CDKN1B,COL13A1,COMP,DLL1,EGLN3,ERG,FABP4,FNIP1,GSN,HEYL,HMOX1,JAG1,KCNJ2,LGALS3,LOXL2,LRP2,PDE2A,PLVAP,RORA,SMAD7,SMOC2,VEGFA,WT1
Cardiovascular System Development and Function	morphology of heart	0.000621			BMP10,CAV3,CD36,CDKN1B,Cdkn1c,EPM2A,FABP3,HEYL,HMOX1,HOXA3,IRX4,ITPA,JAG1,LOXL2,MOV10L1,MSTN,MYL2,SMAD7,VEGFA,WT1
Cardiovascular System Development and Function	abnormal morphology of cardiovascular system	0.000905			ACTA2,BMP10,CAV3,CCNE1,CD36,CDKN1B,EGLN3,EPM2A,ERG,HMOX1,HOXA3,IRX4,ITPA,JAG1,LOXL2,PLVAP,SMAD7,SMAD9,VEGFA,WT1
Cardiovascular System Development and Function	heart rate	0.00155	Increased	2.412	BMP10,CACNA1G,CACNA2D2,CAV3,CORIN,HMOX1,ITPA,MYL2,MYL3,PPP1R1A,SMAD7,TCAP,VEGFA
Cardiovascular System Development and Function	contraction of heart	0.00192		1.982	BMP10,CAV3,CORIN,HMOX1,MYL2,MYL3,PPP1R1A,SMAD7,TCAP,VEGFA
Cardiovascular System Development and Function	morphogenesis of cardiac muscle	0.00274			BMP10,MYL2,MYL3,SMAD7,TCAP
Cardiovascular System Development and Function	morphogenesis of cardiac muscle tissue in heart ventricle	0.00479			BMP10,MYL2,MYL3,SMAD7
Cardiovascular System Development and Function	endothelial cell development	0.00483		1.537	BMP6,C3,CD36,CDKN1B,COMP,FABP4,HEYL,HMOX1,KCNJ2,LGALS3,LOXL2,PDE2A,SMOC2,VEGFA
Cardiovascular System Development and Function	density of capillary vessel	0.00514		-1.067	CDKN1B,EGLN3,FNIP1,VEGFA
Cardiovascular System Development and Function	density of blood vessel	0.00626		-1.14	CDKN1B,EGLN3,FNIP1,GSN,JAG1,VEGFA
Cardiovascular System Development and Function	formation of cardiac muscle	0.00694			BMP10,MYL2,MYL3,SMAD7,TCAP,VEGFA
Cardiovascular System Development and Function	abnormal morphology of heart	0.00696			BMP10,CAV3,CD36,CDKN1B,EPM2A,HMOX1,HOXA3,IRX4,ITPA,JAG1,LOXL2,SMAD7,VEGFA,WT1
Cardiovascular System Development and Function	fractional shortening of cardiomyocytes	0.00744			FABP3,FABP4
Cardiovascular System Development and Function	fractional shortening of heart	0.00831		-0.152	CAV3,FABP3,FABP4,VEGFA
Cardiovascular System Development and Function	morphogenesis of heart	0.01			BMP10,DLL1,HEYL,MYL2,MYL3,SMAD7,TCAP,VEGFA
Cardiovascular System Development and Function	morphology of heart ventricle	0.01			BMP10,CAV3,CDKN1B,Cdkn1c,HEYL,HMOX1,HOXA3,LOXL2,SMAD7,VEGFA
Cardiovascular System Development and Function	vasodilation of capillary vessel	0.0112			VEGFA,WT1
Cardiovascular System Development and Function	development of artery	0.0112			CCNE1,HMOX1,LRP2,PDE2A,SMAD7,VEGFA
Cardiovascular System Development and Function	dilation of heart	0.0124			CAV3,IRX4,MYL2
Cardiovascular System Development and Function	contraction of cardiac muscle	0.0124			BMP10,CAV3,MYL2,MYL3,SMAD7,TCAP
Cardiovascular System Development and Function	morphology of vessel	0.0129			ACTA2,BMP10,CDKN1B,EGLN3,ERG,HMOX1,HOXA3,JAG1,PLVAP,SMAD9,VEGFA,WT1
Cardiovascular System Development and Function	formation of blood vessel	0.013		1.125	COL13A1,FABP4,JAG1,LRP2,PDE2A,VEGFA,WT1
Cardiovascular System Development and Function	abnormal morphology of vasculature	0.0131			A2M,ACTA2,BMP10,EGLN3,ERG,HMOX1,HOXA3,LOXL2,PLVAP,SMAD9,VEGFA,WT1
Cardiovascular System Development and Function	sprouting angiogenesis	0.0133			LOXL2,PDE2A,STAB2,VEGFA
Cardiovascular System Development and Function	morphology of vasculature	0.0142			A2M,ACTA2,BMP10,CDKN1B,EGLN3,ERG,HMOX1,HOXA3,LOXL2,PLVAP,SMAD9,VEGFA,WT1
Cardiovascular System Development and Function	cardiac contractility	0.0145		0.277	CAV3,CORIN,HMOX1,IRX4,MYL2,MYL3,SMAD7,VEGFA
Cardiovascular System Development and Function	abnormal morphology of blood vessel	0.0153			ACTA2,BMP10,EGLN3,ERG,HMOX1,HOXA3,PLVAP,SMAD9,VEGFA,WT1
Cardiovascular System Development and Function	abnormal morphology of interlobular arteries	0.0153			VEGFA,WT1
Cardiovascular System Development and Function	blood pressure	0.0163		-0.145	ACTA2,CD36,Cdkn1c,CORIN,DLL1,EGLN3,HMOX1,RORA,SLC12A2,UTS2B,VEGFA
Cardiovascular System Development and Function	development of aorta	0.0176			CCNE1,LRP2,PDE2A,VEGFA
Cardiovascular System Development and Function	morphology of blood vessel	0.0179			ACTA2,BMP10,CDKN1B,EGLN3,ERG,HMOX1,HOXA3,PLVAP,SMAD9,VEGFA,WT1
Cardiovascular System Development and Function	angiogenesis of endothelial cells	0.0179			COMP,SMOC2,VEGFA
Cardiovascular System Development and Function	proliferation of endothelial cells	0.0183		1.485	BMP6,C3,CD36,CDKN1B,FABP4,HEYL,HMOX1,KCNJ2,LOXL2,PDE2A,VEGFA
Cardiovascular System Development and Function	abnormal morphology of venule	0.0196			ERG,VEGFA
Cardiovascular System Development and Function	chemotaxis of vascular endothelial cells	0.0229			CD36,LGALS3,VEGFA
Cardiovascular System Development and Function	development of vascular endothelial cells	0.0238		1.165	CDKN1B,LGALS3,SMOC2,VEGFA
Cardiovascular System Development and Function	morphology of vascular tissue	0.0238			CDKN1B,VEGFA
Cardiovascular System Development and Function	function of heart	0.0239		0.479	CACNA2D2,CAV3,CORIN,GSN,HMOX1,IRX4,PPP1R1A,SMAD7,VEGFA
Cardiovascular System Development and Function	density of microvessel	0.0239			GSN,JAG1,VEGFA
Cardiovascular System Development and Function	morphogenesis of cardiovascular system	0.0254			BMP10,DLL1,HEYL,LGALS3,MYL2,MYL3,SMAD7,TCAP,VEGFA
Cardiovascular System Development and Function	systolic pressure	0.0296		0.555	ACTA2,Cdkn1c,CORIN,EGLN3,HMOX1,VEGFA
Cardiovascular System Development and Function	function of cardiovascular system	0.0312		0.761	C3,CACNA2D2,CAV3,CD36,CORIN,GSN,HMOX1,IRX4,PPP1R1A,SMAD7,VEGFA
Cardiovascular System Development and Function	mass of heart	0.0328			CAV3,CDKN1B,FABP3,HMOX1,MSTN,VEGFA
Cardiovascular System Development and Function	angiogenesis of vascular endothelial cells	0.0328			SMOC2,VEGFA

## Sheet: Dll4NF_CardSystDevFunc
Category	Diseases or Functions Annotation	p-Value	Predicted Activation State	Activation z-score	Molecules	Molecules
Cardiovascular System Development and Function	development of vasculature	1.28e-06		1.68	A2M,ADM,ADORA2A,ARHGEF4,Ccl2,CLEC1B,CNN1,CRKL,CYSLTR1,DDIT3,DLC1,DLL1,DLL4,EGLN3,FNIP1,FZD8,GJA4,HIF1A,HIF1AN,HIPK2,HLX,HMOX1,ICAM1,JMJD6,KCNJ2,MYO18B,NAB2,NDRG1,NOSTRIN,NOTCH1,ODC1,PDE2A,PFKFB3,PIM3,PLCD3,PLOD1,RORA,SMAD7,SOX17,STAB2,STAT3,TGFBR1,TIPARP,TMEM204,TNFAIP3,VEGFA,WT1	A2M,ADM,ADORA2A,ARHGEF4,Ccl2,CLEC1B,CNN1,CRKL,CYSLTR1,DDIT3,DLC1,DLL1,DLL4,EGLN3,FNIP1,FZD8,GJA4,HIF1A,HIF1AN,HIPK2,HLX,HMOX1,ICAM1,JMJD6,KCNJ2,MYO18B,NAB2,NDRG1,NOSTRIN,NOTCH1,ODC1,PDE2A,PFKFB3,PIM3,PLCD3,PLOD1,RORA,SMAD7,SOX17,STAB2,STAT3,TGFBR1,TIPARP,TMEM204,TNFAIP3,VEGFA,WT1
Cardiovascular System Development and Function	angiogenesis	3.37e-06		1.677	ADM,ADORA2A,ARHGEF4,Ccl2,CLEC1B,CRKL,CYSLTR1,DDIT3,DLL1,DLL4,EGLN3,FNIP1,FZD8,GJA4,HIF1A,HIF1AN,HIPK2,HLX,HMOX1,ICAM1,JMJD6,KCNJ2,MYO18B,NAB2,NDRG1,NOSTRIN,NOTCH1,ODC1,PDE2A,PFKFB3,PIM3,PLCD3,RORA,SMAD7,SOX17,STAB2,STAT3,TGFBR1,TIPARP,TNFAIP3,VEGFA,WT1	ADM,ADORA2A,ARHGEF4,Ccl2,CLEC1B,CRKL,CYSLTR1,DDIT3,DLL1,DLL4,EGLN3,FNIP1,FZD8,GJA4,HIF1A,HIF1AN,HIPK2,HLX,HMOX1,ICAM1,JMJD6,KCNJ2,MYO18B,NAB2,NDRG1,NOSTRIN,NOTCH1,ODC1,PDE2A,PFKFB3,PIM3,PLCD3,RORA,SMAD7,SOX17,STAB2,STAT3,TGFBR1,TIPARP,TNFAIP3,VEGFA,WT1
Cardiovascular System Development and Function	cardiogenesis	2.86e-05		0	ADM,ATF7,BICC1,BIN1,CASQ1,CCND2,CRKL,DHRS3,DLC1,DLL1,DLL4,FZD2,HIF1A,HMOX1,ICAM1,JMJD6,MYO18B,NOTCH1,PDE2A,PTPN11,SMAD7,SOX17,TGFBR1,TTN,VEGFA,WT1,XIRP1	ADM,ATF7,BICC1,BIN1,CASQ1,CCND2,CRKL,DHRS3,DLC1,DLL1,DLL4,FZD2,HIF1A,HMOX1,ICAM1,JMJD6,MYO18B,NOTCH1,PDE2A,PTPN11,SMAD7,SOX17,TGFBR1,TTN,VEGFA,WT1,XIRP1
Cardiovascular System Development and Function	vasculogenesis	3.76e-05		1.123	ADM,Ccl2,CLEC1B,CRKL,DDIT3,DLL1,DLL4,EGLN3,FNIP1,HIF1A,HIF1AN,HIPK2,HLX,HMOX1,ICAM1,KCNJ2,MYO18B,NAB2,NOSTRIN,NOTCH1,ODC1,PDE2A,PFKFB3,PIM3,PLCD3,RORA,SMAD7,SOX17,STAT3,TGFBR1,TIPARP,TNFAIP3,VEGFA,WT1	ADM,Ccl2,CLEC1B,CRKL,DDIT3,DLL1,DLL4,EGLN3,FNIP1,HIF1A,HIF1AN,HIPK2,HLX,HMOX1,ICAM1,KCNJ2,MYO18B,NAB2,NOSTRIN,NOTCH1,ODC1,PDE2A,PFKFB3,PIM3,PLCD3,RORA,SMAD7,SOX17,STAT3,TGFBR1,TIPARP,TNFAIP3,VEGFA,WT1
Cardiovascular System Development and Function	morphology of heart ventricle	8.14e-05			ADM,ADORA2A,BIN1,Ccl2,CCND2,Cdkn1c,CTSV,DHRS3,FNIP1,HIF1A,HMOX1,IER3,JMJD6,PTPN11,SMAD7,STAT3,TTN,VEGFA	ADM,ADORA2A,BIN1,Ccl2,CCND2,Cdkn1c,CTSV,DHRS3,FNIP1,HIF1A,HMOX1,IER3,JMJD6,PTPN11,SMAD7,STAT3,TTN,VEGFA
Cardiovascular System Development and Function	abnormal morphology of artery	8.62e-05			ADM,ADORA2A,CRKL,DLL4,EGLN3,HIF1A,HMOX1,JMJD6,NOTCH1,PLOD1,VEGFA,WT1	ADM,ADORA2A,CRKL,DLL4,EGLN3,HIF1A,HMOX1,JMJD6,NOTCH1,PLOD1,VEGFA,WT1
Cardiovascular System Development and Function	morphology of cardiovascular system	0.000165			ADM,ADORA2A,BIN1,C8orf4,Ccl2,CCND2,Cdkn1c,CLEC1B,CNN1,CRKL,CTSV,DHRS3,DIDO1,DLL4,EGLN3,FNIP1,HIF1A,HMOX1,IER3,JMJD6,NOTCH1,PIM3,PLOD1,PPP1R3C,PTPN11,RRAD,SMAD7,STAT3,TLN1,TNFAIP3,TTN,VEGFA,WT1,XIRP1	ADM,ADORA2A,BIN1,C8orf4,Ccl2,CCND2,Cdkn1c,CLEC1B,CNN1,CRKL,CTSV,DHRS3,DIDO1,DLL4,EGLN3,FNIP1,HIF1A,HMOX1,IER3,JMJD6,NOTCH1,PIM3,PLOD1,PPP1R3C,PTPN11,RRAD,SMAD7,STAT3,TLN1,TNFAIP3,TTN,VEGFA,WT1,XIRP1
Cardiovascular System Development and Function	morphogenesis of heart	0.000328			DLC1,DLL1,DLL4,FZD2,HIF1A,NOTCH1,SMAD7,SOX17,TGFBR1,TTN,VEGFA,XIRP1	DLC1,DLL1,DLL4,FZD2,HIF1A,NOTCH1,SMAD7,SOX17,TGFBR1,TTN,VEGFA,XIRP1
Cardiovascular System Development and Function	abnormal morphology of cardiovascular system	0.000699			ADM,ADORA2A,BIN1,C8orf4,Ccl2,CCND2,CLEC1B,CRKL,DHRS3,DIDO1,DLL4,EGLN3,HIF1A,HMOX1,IER3,JMJD6,NOTCH1,PIM3,PLOD1,SMAD7,TTN,VEGFA,WT1,XIRP1	ADM,ADORA2A,BIN1,C8orf4,Ccl2,CCND2,CLEC1B,CRKL,DHRS3,DIDO1,DLL4,EGLN3,HIF1A,HMOX1,IER3,JMJD6,NOTCH1,PIM3,PLOD1,SMAD7,TTN,VEGFA,WT1,XIRP1
Cardiovascular System Development and Function	abnormal morphology of vasculature	0.0008			A2M,ADM,ADORA2A,CLEC1B,CRKL,DLC1,DLL4,EGLN3,HIF1A,HMOX1,ICAM1,JMJD6,NOSTRIN,NOTCH1,PLOD1,VEGFA,WT1	A2M,ADM,ADORA2A,CLEC1B,CRKL,DLC1,DLL4,EGLN3,HIF1A,HMOX1,ICAM1,JMJD6,NOSTRIN,NOTCH1,PLOD1,VEGFA,WT1
Cardiovascular System Development and Function	blood pressure	0.000853		1.13	ABCC1,ADM,ADORA2A,BGN,Cdkn1c,CLEC1B,DBP,DLL1,EGLN3,HIF1A,HMOX1,IER3,RORA,SGK1,TTN,VEGFA	ABCC1,ADM,ADORA2A,BGN,Cdkn1c,CLEC1B,DBP,DLL1,EGLN3,HIF1A,HMOX1,IER3,RORA,SGK1,TTN,VEGFA
Cardiovascular System Development and Function	morphogenesis of cardiovascular system	0.000994		-0.469	DHRS3,DLC1,DLL1,DLL4,FZD2,HIF1A,NOTCH1,ODC1,SMAD7,SOX17,TGFBR1,TTN,VEGFA,XIRP1	DHRS3,DLC1,DLL1,DLL4,FZD2,HIF1A,NOTCH1,ODC1,SMAD7,SOX17,TGFBR1,TTN,VEGFA,XIRP1
Cardiovascular System Development and Function	movement of vascular endothelial cells	0.00103		1.041	ADM,ARHGEF4,DLC1,DLL4,HIF1A,HLX,NOSTRIN,PDE2A,PTPN11,STAB2,STAT3,VEGFA	ADM,ARHGEF4,DLC1,DLL4,HIF1A,HLX,NOSTRIN,PDE2A,PTPN11,STAB2,STAT3,VEGFA
Cardiovascular System Development and Function	morphology of heart	0.00103			ADM,ADORA2A,BIN1,Ccl2,CCND2,Cdkn1c,CRKL,CTSV,DHRS3,FNIP1,HIF1A,HMOX1,IER3,JMJD6,NOTCH1,PPP1R3C,PTPN11,RRAD,SMAD7,STAT3,TLN1,TNFAIP3,TTN,VEGFA,WT1,XIRP1	ADM,ADORA2A,BIN1,Ccl2,CCND2,Cdkn1c,CRKL,CTSV,DHRS3,FNIP1,HIF1A,HMOX1,IER3,JMJD6,NOTCH1,PPP1R3C,PTPN11,RRAD,SMAD7,STAT3,TLN1,TNFAIP3,TTN,VEGFA,WT1,XIRP1
Cardiovascular System Development and Function	morphology of vasculature	0.00123			A2M,ADM,ADORA2A,CLEC1B,CNN1,CRKL,DLC1,DLL4,EGLN3,HIF1A,HMOX1,ICAM1,JMJD6,NOSTRIN,NOTCH1,PLOD1,VEGFA,WT1	A2M,ADM,ADORA2A,CLEC1B,CNN1,CRKL,DLC1,DLL4,EGLN3,HIF1A,HMOX1,ICAM1,JMJD6,NOSTRIN,NOTCH1,PLOD1,VEGFA,WT1
Cardiovascular System Development and Function	migration of vascular endothelial cells	0.00147		0.745	ADM,ARHGEF4,DLC1,DLL4,HIF1A,HLX,NOSTRIN,PDE2A,STAB2,STAT3,VEGFA	ADM,ARHGEF4,DLC1,DLL4,HIF1A,HLX,NOSTRIN,PDE2A,STAB2,STAT3,VEGFA
Cardiovascular System Development and Function	branching of endothelial cells	0.00175		0.332	ADM,DLL4,HLX,NAB2,NOTCH1,PIM3,VEGFA	ADM,DLL4,HLX,NAB2,NOTCH1,PIM3,VEGFA
Cardiovascular System Development and Function	vascularization	0.00194		1.845	ARHGEF4,Ccl2,HIF1A,ICAM1,NOSTRIN,NOTCH1,ODC1,PLCD3,RORA,STAT3,TNFAIP3,VEGFA,WT1	ARHGEF4,Ccl2,HIF1A,ICAM1,NOSTRIN,NOTCH1,ODC1,PLCD3,RORA,STAT3,TNFAIP3,VEGFA,WT1
Cardiovascular System Development and Function	morphology of cardiac muscle	0.00231			BIN1,Cdkn1c,HIF1A,IER3,JMJD6,NOTCH1,PTPN11,RRAD,SMAD7,STAT3,TNFAIP3,TTN,VEGFA,XIRP1	BIN1,Cdkn1c,HIF1A,IER3,JMJD6,NOTCH1,PTPN11,RRAD,SMAD7,STAT3,TNFAIP3,TTN,VEGFA,XIRP1
Cardiovascular System Development and Function	generation of cardiomyocytes	0.00308			MYO18B,PTPN11,TTN,VEGFA	MYO18B,PTPN11,TTN,VEGFA
Cardiovascular System Development and Function	development of artery	0.00317			CRKL,DLL4,HMOX1,ICAM1,PDE2A,SMAD7,STAT3,TGFBR1,VEGFA	CRKL,DLL4,HMOX1,ICAM1,PDE2A,SMAD7,STAT3,TGFBR1,VEGFA
Cardiovascular System Development and Function	abnormal morphology of blood vessel	0.00337			ADM,ADORA2A,CLEC1B,CRKL,DLL4,EGLN3,HIF1A,HMOX1,JMJD6,NOTCH1,PLOD1,VEGFA,WT1	ADM,ADORA2A,CLEC1B,CRKL,DLL4,EGLN3,HIF1A,HMOX1,JMJD6,NOTCH1,PLOD1,VEGFA,WT1
Cardiovascular System Development and Function	enlargement of heart ventricle	0.00343			ADORA2A,Ccl2,CTSV,FNIP1,HIF1A,IER3,PTPN11,SMAD7,TTN	ADORA2A,Ccl2,CTSV,FNIP1,HIF1A,IER3,PTPN11,SMAD7,TTN
Cardiovascular System Development and Function	vascularization of heart	0.00367			Ccl2,STAT3,WT1	Ccl2,STAT3,WT1
Cardiovascular System Development and Function	sprouting of vascular endothelial cells	0.00372		0.426	ADM,DLL4,HLX,NAB2,VEGFA	ADM,DLL4,HLX,NAB2,VEGFA
Cardiovascular System Development and Function	sprouting angiogenesis	0.00391			JMJD6,NOTCH1,PDE2A,STAB2,VEGFA	JMJD6,NOTCH1,PDE2A,STAB2,VEGFA
Cardiovascular System Development and Function	contractility of cardiac muscle	0.00442		1.342	ADM,HMOX1,ICAM1,IER3,RRAD,SMAD7,TTN,VEGFA,XIRP1	ADM,HMOX1,ICAM1,IER3,RRAD,SMAD7,TTN,VEGFA,XIRP1
Cardiovascular System Development and Function	morphology of vessel	0.00445			ADM,ADORA2A,CLEC1B,CNN1,CRKL,DLL4,EGLN3,HIF1A,HMOX1,JMJD6,NOTCH1,PLOD1,TMEM204,VEGFA,WT1	ADM,ADORA2A,CLEC1B,CNN1,CRKL,DLL4,EGLN3,HIF1A,HMOX1,JMJD6,NOTCH1,PLOD1,TMEM204,VEGFA,WT1
Cardiovascular System Development and Function	development of cardiovascular tissue	0.00541		1.717	ADM,Ccl2,CLEC1B,DLL4,HIF1A,HIF1AN,HIPK2,HMOX1,KCNJ2,NOTCH1,ODC1,PDE2A,PFKFB3,STAT3,TGFBR1,VEGFA	ADM,Ccl2,CLEC1B,DLL4,HIF1A,HIF1AN,HIPK2,HMOX1,KCNJ2,NOTCH1,ODC1,PDE2A,PFKFB3,STAT3,TGFBR1,VEGFA
Cardiovascular System Development and Function	abnormal morphology of heart ventricle	0.00541			ADM,BIN1,Ccl2,CCND2,DHRS3,HIF1A,HMOX1,JMJD6,SMAD7,TTN	ADM,BIN1,Ccl2,CCND2,DHRS3,HIF1A,HMOX1,JMJD6,SMAD7,TTN
Cardiovascular System Development and Function	morphology of blood vessel	0.00568			ADM,ADORA2A,CLEC1B,CNN1,CRKL,DLL4,EGLN3,HIF1A,HMOX1,JMJD6,NOTCH1,PLOD1,VEGFA,WT1	ADM,ADORA2A,CLEC1B,CNN1,CRKL,DLL4,EGLN3,HIF1A,HMOX1,JMJD6,NOTCH1,PLOD1,VEGFA,WT1
Cardiovascular System Development and Function	hypertrophy of heart	0.00595			ADM,ADORA2A,Ccl2,FNIP1,HIF1A,HMOX1,IER3,PTPN11,RRAD,SMAD7,STAT3,TLN1,TNFAIP3,TTN,XIRP1	ADM,ADORA2A,Ccl2,FNIP1,HIF1A,HMOX1,IER3,PTPN11,RRAD,SMAD7,STAT3,TLN1,TNFAIP3,TTN,XIRP1
Cardiovascular System Development and Function	abnormal morphology of heart	0.00617			ADM,BIN1,Ccl2,CCND2,CRKL,DHRS3,HIF1A,HMOX1,IER3,JMJD6,NOTCH1,SMAD7,TTN,VEGFA,WT1,XIRP1	ADM,BIN1,Ccl2,CCND2,CRKL,DHRS3,HIF1A,HMOX1,IER3,JMJD6,NOTCH1,SMAD7,TTN,VEGFA,WT1,XIRP1
Cardiovascular System Development and Function	morphology of cardiomyocytes	0.00696			BIN1,Cdkn1c,IER3,PTPN11,RRAD,SMAD7,STAT3,TNFAIP3,TTN,VEGFA,XIRP1	BIN1,Cdkn1c,IER3,PTPN11,RRAD,SMAD7,STAT3,TNFAIP3,TTN,VEGFA,XIRP1
Cardiovascular System Development and Function	formation of endocardium	0.00696			NOTCH1,SOX17,VEGFA	NOTCH1,SOX17,VEGFA
Cardiovascular System Development and Function	density of capillary vessel	0.00777		-1.067	EGLN3,FNIP1,HIF1A,VEGFA	EGLN3,FNIP1,HIF1A,VEGFA
Cardiovascular System Development and Function	morphogenesis of outflow tract	0.0081			DHRS3,FZD2,HIF1A,SOX17,VEGFA	DHRS3,FZD2,HIF1A,SOX17,VEGFA
Cardiovascular System Development and Function	ventricular hypertrophy	0.0082			ADORA2A,Ccl2,FNIP1,HIF1A,IER3,PTPN11,SMAD7,TTN	ADORA2A,Ccl2,FNIP1,HIF1A,IER3,PTPN11,SMAD7,TTN
Cardiovascular System Development and Function	morphology of ventricular septum	0.00827			ADM,BIN1,CCND2,DHRS3,HIF1A,PTPN11	ADM,BIN1,CCND2,DHRS3,HIF1A,PTPN11
Cardiovascular System Development and Function	cell movement of endothelial cells	0.00838		1.53	ADM,ARHGEF4,CLEC1B,DLC1,DLL4,HIF1A,HLX,ICAM1,NOSTRIN,PDE2A,PTPN11,STAB2,STAT3,TGFBR1,VEGFA	ADM,ARHGEF4,CLEC1B,DLC1,DLL4,HIF1A,HLX,ICAM1,NOSTRIN,PDE2A,PTPN11,STAB2,STAT3,TGFBR1,VEGFA
Cardiovascular System Development and Function	endothelial cell development	0.00885		1.553	ADM,Ccl2,CLEC1B,DLL4,HIF1A,HIF1AN,HIPK2,HMOX1,KCNJ2,NOTCH1,ODC1,PDE2A,PFKFB3,TGFBR1,VEGFA	ADM,Ccl2,CLEC1B,DLL4,HIF1A,HIF1AN,HIPK2,HMOX1,KCNJ2,NOTCH1,ODC1,PDE2A,PFKFB3,TGFBR1,VEGFA
Cardiovascular System Development and Function	QT interval of heart	0.00916			KCNE3,KCNJ2,PALLD,VEGFA	KCNE3,KCNJ2,PALLD,VEGFA
Cardiovascular System Development and Function	abnormal regression of vasculature	0.00927			DLL4,HIF1A,VEGFA	DLL4,HIF1A,VEGFA
Cardiovascular System Development and Function	migration of endothelial cells	0.00934		1.297	ADM,ARHGEF4,CLEC1B,DLC1,DLL4,HIF1A,HLX,ICAM1,NOSTRIN,PDE2A,STAB2,STAT3,TGFBR1,VEGFA	ADM,ARHGEF4,CLEC1B,DLC1,DLL4,HIF1A,HLX,ICAM1,NOSTRIN,PDE2A,STAB2,STAT3,TGFBR1,VEGFA
Cardiovascular System Development and Function	formation of ventricular septum	0.00984			FZD2,NOTCH1,PDE2A,PTPN11,SMAD7,TGFBR1	FZD2,NOTCH1,PDE2A,PTPN11,SMAD7,TGFBR1
Cardiovascular System Development and Function	vascularization of absolute anatomical region	0.0103		1.763	Ccl2,HIF1A,ICAM1,NOSTRIN,RORA,STAT3,VEGFA,WT1	Ccl2,HIF1A,ICAM1,NOSTRIN,RORA,STAT3,VEGFA,WT1
Cardiovascular System Development and Function	development of lymph vessel	0.0107			CLEC1B,HIF1A,TMEM204,VEGFA	CLEC1B,HIF1A,TMEM204,VEGFA
Cardiovascular System Development and Function	development of outflow tract	0.0117			CRKL,DHRS3,FZD2,HIF1A,SOX17,VEGFA	CRKL,DHRS3,FZD2,HIF1A,SOX17,VEGFA

## Sheet: Dll4Cdh5_CardSystDevFunc
Category	Diseases or Functions Annotation	p-Value	Predicted Activation State	Activation z-score	Flags	Molecules
Cardiovascular System Development and Function	vasculogenesis	1.84e-10		1.215	bias	ADAM15,ANGPTL4,APLN,ARHGEF15,BCL2,BCL6B,C3,CAV1,CDKN1A,CLEC1B,DDIT3,DLL4,EGLN1,EGLN3,ESAM,ESR1,FABP4,FLT4,H2AFX,HMOX1,NOSTRIN,ODC1,PDE2A,PDGFB,PLAU,PLAUR,PRCP,STAT1,VEGFA,WT1
Cardiovascular System Development and Function	development of vasculature	8.18e-09		1.352	bias	ADAM15,ADORA2A,ANGPTL4,APLN,ARHGEF15,BCL2,BCL6B,C3,CAV1,CDKN1A,CLEC1B,DDIT3,DLL4,EGFL7,EGLN1,EGLN3,ERG,ESAM,ESR1,FABP4,FLT4,H2AFX,HMOX1,NOSTRIN,ODC1,PDE2A,PDGFB,PLAU,PLAUR,PLOD1,PRCP,PXN,STAT1,VEGFA,WT1
Cardiovascular System Development and Function	angiogenesis	8.85e-09		1.352	bias	ADAM15,ADORA2A,ANGPTL4,APLN,ARHGEF15,BCL2,BCL6B,C3,CAV1,CDKN1A,CLEC1B,DDIT3,DLL4,EGLN1,EGLN3,ESAM,ESR1,FABP4,FLT4,H2AFX,HMOX1,NOSTRIN,ODC1,PDE2A,PDGFB,PLAU,PLAUR,PRCP,STAT1,VEGFA,WT1
Cardiovascular System Development and Function	morphology of vessel	1.73e-06				ADORA2A,ANGPTL4,APLN,BCL2,CLEC1B,DLL4,EGLN1,EGLN3,ERG,ESR1,FLT4,HMOX1,PDGFB,PLAU,PLOD1,PXN,VEGFA,WT1
Cardiovascular System Development and Function	morphology of blood vessel	1.01e-05				ADORA2A,APLN,BCL2,CLEC1B,DLL4,EGLN1,EGLN3,ERG,ESR1,FLT4,HMOX1,PDGFB,PLOD1,PXN,VEGFA,WT1
Cardiovascular System Development and Function	morphology of vasculature	1.11e-05				ADORA2A,APLN,BCL2,CAV1,CLEC1B,DLL4,EGLN1,EGLN3,ERG,ESR1,FLT4,HMOX1,NOSTRIN,PDGFB,PLOD1,PXN,VEGFA,WT1
Cardiovascular System Development and Function	neovascularization of choroid	2.33e-05		1.71		ADAM15,BCL2,C3,NOSTRIN,PLAU,PLAUR,VEGFA
Cardiovascular System Development and Function	vascularization of absolute anatomical region	2.65e-05		1.977	bias	ADAM15,ARHGEF15,BCL2,C3,H2AFX,NOSTRIN,PLAU,PLAUR,VEGFA,WT1
Cardiovascular System Development and Function	vascularization of eye	4.69e-05		1.691		ADAM15,ARHGEF15,BCL2,C3,H2AFX,NOSTRIN,PLAU,PLAUR,VEGFA
Cardiovascular System Development and Function	endothelial cell development	8.09e-05		1.187		ANGPTL4,CAV1,CLEC1B,DLL4,FABP4,FLT4,ODC1,PDGFB,VEGFA
Cardiovascular System Development and Function	organization of endothelial cells	9.35e-05				EGFL7,FLT4,VEGFA
Cardiovascular System Development and Function	neovascularization of eye	0.000109		1.691	bias	ADAM15,BCL2,C3,H2AFX,NOSTRIN,PLAU,PLAUR,VEGFA
Cardiovascular System Development and Function	permeability of vasculature	0.000112		0.166		ADORA2A,APLN,AQP4,C3,CAV1,ESAM,PLAU,VEGFA
Cardiovascular System Development and Function	morphology of artery	0.000128				ADORA2A,DLL4,EGLN3,ESR1,HMOX1,PDGFB,PLOD1,PXN,VEGFA,WT1
Cardiovascular System Development and Function	morphology of capillary vessel	0.000131				APLN,DLL4,EGLN1,PDGFB,VEGFA,WT1
Cardiovascular System Development and Function	quantity of endothelial cells	0.000163		1.067		BCL2,BCL6B,CAV1,PDGFB,VEGFA
Cardiovascular System Development and Function	vascularization	0.00021	Increased	2.21	bias	ADAM15,ARHGEF15,BCL2,C3,H2AFX,NOSTRIN,ODC1,PLAU,PLAUR,VEGFA,WT1
Cardiovascular System Development and Function	blood pressure	0.000218		0.427		ADORA2A,APLN,APLNR,CAV1,CLEC1B,EGLN3,HMOX1,PLAU,PLAUR,PRCP,SGK1,VEGFA
Cardiovascular System Development and Function	morphology of cardiovascular system	0.000263				ADAM15,ADORA2A,APLN,BCL2,CAV1,CDKN1A,CLEC1B,DLL4,DUSP6,EGLN1,EGLN3,ERG,ESR1,FLRT2,FLT4,HMOX1,LYN,PDGFB,PLAU,PLOD1,PXN,SLC4A1,VEGFA,WT1
Cardiovascular System Development and Function	abnormal morphology of artery	0.000272				ADORA2A,DLL4,EGLN3,HMOX1,PDGFB,PLOD1,PXN,VEGFA,WT1
Cardiovascular System Development and Function	abnormal morphology of vasculature	0.000299				ADORA2A,BCL2,CAV1,CLEC1B,DLL4,EGLN3,ERG,HMOX1,NOSTRIN,PDGFB,PLOD1,PXN,VEGFA,WT1
Cardiovascular System Development and Function	migration of endothelial cells	0.000304		0.972	bias	ANGPTL4,CLEC1B,DLL4,EGFL7,ESAM,NOSTRIN,VEGFA
Cardiovascular System Development and Function	proliferation of endothelial cells	0.000318		0.562		ANGPTL4,CAV1,CLEC1B,DLL4,FABP4,PDGFB,VEGFA
Cardiovascular System Development and Function	abnormal morphology of blood vessel	0.000324				ADORA2A,BCL2,CLEC1B,DLL4,EGLN3,ERG,HMOX1,PDGFB,PLOD1,PXN,VEGFA,WT1
Cardiovascular System Development and Function	abnormal morphology of cardiovascular system	0.000347				ADAM15,ADORA2A,BCL2,CAV1,CDKN1A,CLEC1B,DLL4,EGLN1,EGLN3,ERG,FLRT2,HMOX1,LYN,PDGFB,PLOD1,PXN,SLC4A1,VEGFA,WT1
Cardiovascular System Development and Function	size of vessel	0.000406				APLN,EGLN1,ESR1,PLAU,VEGFA
Cardiovascular System Development and Function	morphology of endothelial tissue	0.000678				BCL2,CAV1,CDKN1A,FLT4,PDGFB,VEGFA
Cardiovascular System Development and Function	sprouting angiogenesis	0.0011				FLT4,PDE2A,PLAUR,VEGFA
Cardiovascular System Development and Function	vascularization of retina	0.00111				ADAM15,ARHGEF15,C3,H2AFX,VEGFA
Cardiovascular System Development and Function	morphology of right ventricle	0.00119				ADAM15,ADORA2A,CAV1,ERG,HMOX1,PDGFB
Cardiovascular System Development and Function	angiogenesis of skin	0.00132				BCL6B,FLT4,VEGFA
Cardiovascular System Development and Function	permeability of blood vessel	0.00135		0.188		ADORA2A,AQP4,C3,CAV1,ESAM,VEGFA
Cardiovascular System Development and Function	abnormal morphology of pericytes	0.00163				BCL2,PDGFB,VEGFA
Cardiovascular System Development and Function	formation of blood vessel	0.00204		1.951	bias	EGLN1,FABP4,PDE2A,PLAUR,VEGFA,WT1
Cardiovascular System Development and Function	size of blood vessel	0.00222				APLN,EGLN1,ESR1,VEGFA
Cardiovascular System Development and Function	abnormal morphology of endothelial tissue	0.00223				BCL2,CAV1,CDKN1A,PDGFB,VEGFA
Cardiovascular System Development and Function	morphogenesis of cardiovascular system	0.00247				BMP5,DLL4,EGLN1,FLRT2,FLT4,ODC1,PDGFB,VEGFA,XIRP2
Cardiovascular System Development and Function	tubulation of endothelial cells	0.00273				ANGPTL4,ESAM,VEGFA
Cardiovascular System Development and Function	vasodilation of aorta	0.00277		1.154		F2RL3,PDGFB,PLAU,PLAUR
Cardiovascular System Development and Function	contractility of cardiac muscle	0.00296		1.698	bias	APLN,APLNR,CAV1,HMOX1,PLAU,SLC4A1,VEGFA
Cardiovascular System Development and Function	formation of artery	0.00364				PDE2A,PLAUR,VEGFA
Cardiovascular System Development and Function	morphology of heart ventricle	0.00388				ADAM15,ADORA2A,CAV1,EGLN1,ERG,HMOX1,PDGFB,PLAU,SLC4A1,VEGFA
Cardiovascular System Development and Function	angiogenesis of heart	0.00395				EGLN1,VEGFA
Cardiovascular System Development and Function	perfusion of lower limb	0.00395				ADAM15,EGLN1
Cardiovascular System Development and Function	vasodilation of aortic root	0.00395				PLAU,PLAUR
Cardiovascular System Development and Function	formation of cardiac muscle	0.00526				BMP5,EGLN1,PDGFB,VEGFA,XIRP2
Cardiovascular System Development and Function	abnormal morphology of capillary vessel	0.00562				DLL4,PDGFB,VEGFA,WT1
Cardiovascular System Development and Function	abnormal morphology of interlobular arteries	0.00562				VEGFA,WT1
Cardiovascular System Development and Function	retinal neovascularization	0.00623				ADAM15,C3,H2AFX,VEGFA
Cardiovascular System Development and Function	abnormal morphology of right ventricle	0.00663				ADAM15,CAV1,HMOX1,PDGFB
Cardiovascular System Development and Function	development of pericardium	0.00683				BMP5,DLL4,WT1
