# Supplementary material for: Coronary arterial development is regulated by a Dll4-Jag1-EphrinB2 signaling cascade
Source: eLife. 2019 Dec 4;8:e49977. doi: 10.7554/eLife.49977 (PMC6917494; doi:10.7554/eLife.49977)
Supplement: Supplementary file 4. [file elife-49977-supp4.xlsx]

## Sheet: Hoja1
			Primary antibodies
Antigen	Cardiac expression	Catalog number	Clone number	Source Ig	IHC dilution	Source
a-SMA-Cy3	Cardiomyocytes/smooth muscle cells	D3B8	1A4	Mouse	100	Sigma-Aldrich
SM22a	Smooth muscle cells	ab10135		Goat	100	Abcam
BrdU	Cells in S-phase of the cell cycle	347580	B-44	Mouse	50	BD Biosciences
CD31/Pecam-1	Endocardium/coronary endothelium	550274	MEC 13.3	Rat	100	BD Biosciences
Dll4	Endocardium/coronary endothelium	sc-28915	H-70	Rabbit	100	Santa Cruz Biotechnology
Endomucin	Endocardium	sc-65495	V.7C7	Rat	200	Santa Cruz Biotechnology
GFP	GFP expressing cells	632381	JL-8	Mouse	200	Clontech
Jag1	Cardiomyocytes/coronary endothelium	2620	28H8	Rabbit	100	Cell Signaling Technology
NFATc1	Endocardium	ALX-804-022-R100	7A6	Mouse	100	Enzo Life Sciences
Cleaved Notch1 (Val1744)_N1ICD	Endocardium/coronary endothelium	4147	D3B8	Rabbit	100	Cell Signaling Technology
p27/Kip1	Cells in S-phase of the cell cycle	K0082-3	p27 Kip1	Mouse	100	Medical and Biological Laboratories
Notch 3	Pericytes/smooth muscle cells	ab23426	G00041	Rabbit	150	Abcam
ERG	Endothelium	ab110639	EPR3863	Rabbit	100	Abcam
Glut1	Cell membrane	07-1401	C00222	Rabbit	100	MERCK Millipore
			Lectins
Isolectin IB4-Alexa Fluor 647	Endocardium/coronary endothelium	I32450			300	Molecular Probes
			Secondary antibodies
Antigen	Label or Dye	Amplification	Catalog number	IHC dilution	Source
Anti-rabbit	HRP	TSA Cy3 or fluorescein	P0448	100	Dako
Anti-goat	HRP	TSA Cy3 or fluorescein	P0449	100	Dako
Anti-goat	Alexa Fluor 594		A-21468	200	ThermoFisher
Anti-rat	Biotin	TSA Cy3 or fluorescein	BA4001	100	Vector laboratories
Anti-rabbit	Biotin	TSA Cy3 or fluorescein	111-066-003	100	Jackson Immunoresearch
Anti-rabbit	Alexa Fluor 488		711-547-003	150	Jackson Immunoresearch
Anti-mouse	Alexa Fluor 647		115-606-003	200	Jackson Immunoresearch
Anti-mouse	Alexa Fluor 488		A-11029	200	Invitrogen
Anti-rat	Alexa Fluor 488		A-11006	200	Invitrogen
